# Supplementary material for: Construction and Validation of a Novel Immunosignature for Overall Survival in Uveal Melanoma
Source: Front Cell Dev Biol. 2021 Sep 6;9:710558. doi: 10.3389/fcell.2021.710558 (PMC8450517; doi:10.3389/fcell.2021.710558)
Supplement: Supplementary file 2 [file Table_1.xlsx]

## Sheet: Sheet1
Gene name	logFC	abs(logFC)	label	AveExpr	t	P.Value	adj.P.Val	B
RP11-726G1.1	-4.13218	4.13218	down	0.0495696	-12.5224	2.72735e-20	1.59771e-15	35.6531
ISM1	4.43899	4.43899	up	-1.1728	10.5053	1.50215e-16	2.19994e-12	27.0606
CHAC1	3.84196	3.84196	up	4.19972	10.3147	3.45722e-16	3.37546e-12	26.2296
RP11-145O15.2	-6.16531	6.16531	down	-5.56219	-10.2434	4.72562e-16	3.95474e-12	25.918
RP13-735L24.1	-3.60198	3.60198	down	-2.5414	-10.1143	8.33279e-16	6.10179e-12	25.3527
ECM1	3.50561	3.50561	up	3.06403	10.0203	1.26002e-15	7.38134e-12	24.9406
SLC25A38	-1.67864	1.67864	down	3.47824	-9.93872	1.80452e-15	9.61006e-12	24.5827
MYEOV	4.46268	4.46268	up	0.341597	9.71877	4.76414e-15	2.14683e-11	23.6154
HTR2B	6.57599	6.57599	up	1.27969	9.69344	5.32848e-15	2.22963e-11	23.5039
RP11-599J14.2	-4.89835	4.89835	down	0.691467	-9.60009	8.05279e-15	3.14493e-11	23.0925
MIR4435-2HG	3.08906	3.08906	up	2.41144	9.5067	1.21774e-14	4.19625e-11	22.6807
LAG3	4.37079	4.37079	up	-0.962958	9.34726	2.46942e-14	7.61375e-11	21.9766
ZNF467	2.01348	2.01348	up	0.386375	9.31836	2.80735e-14	8.22287e-11	21.8489
KCTD17	2.25995	2.25995	up	1.82106	9.22445	4.25967e-14	1.18115e-10	21.4338
ZNF667-AS1	-3.63146	3.63146	down	2.40503	-9.21533	4.4358e-14	1.18115e-10	21.3935
CITED1	2.09002	2.09002	up	9.32987	9.15401	5.82501e-14	1.48363e-10	21.1223
LINC00152	3.16964	3.16964	up	1.75173	9.13472	6.3465e-14	1.51325e-10	21.037
C4B	3.316	3.316	up	4.17343	9.12939	6.49855e-14	1.51325e-10	21.0134
VGF	5.25759	5.25759	up	0.529771	9.12198	6.71626e-14	1.51325e-10	20.9806
ROPN1B	-2.37846	2.37846	down	3.75747	-9.07273	8.36007e-14	1.67411e-10	20.7627
HNMT	-1.77696	1.77696	down	3.81747	-9.07174	8.39681e-14	1.67411e-10	20.7583
SLC44A3	-2.09928	2.09928	down	3.55787	-9.06534	8.63923e-14	1.67411e-10	20.73
ZNF835	-3.88106	3.88106	down	-1.31664	-9.06007	8.84426e-14	1.67411e-10	20.7067
EDNRB	-2.20561	2.20561	down	6.03351	-9.05255	9.14488e-14	1.67411e-10	20.6734
MLIP	-3.12198	3.12198	down	3.6322	-9.01933	1.06007e-13	1.88182e-10	20.5264
OVOS2	-3.79148	3.79148	down	1.57578	-9.00915	1.10917e-13	1.91107e-10	20.4813
C4A	3.16594	3.16594	up	4.2317	8.97266	1.30467e-13	2.12303e-10	20.3198
ITGA5	1.83796	1.83796	up	2.57578	8.93499	1.5427e-13	2.33385e-10	20.1531
PPP1R3C	-1.94116	1.94116	down	3.56029	-8.93023	1.57575e-13	2.33385e-10	20.132
NR6A1	-2.35	2.35	down	-1.31608	-8.92454	1.6161e-13	2.33385e-10	20.1068
S100A6	1.55447	1.55447	up	8.51168	8.90269	1.78118e-13	2.48436e-10	20.01
SULF2	2.25416	2.25416	up	2.99496	8.87837	1.98478e-13	2.70397e-10	19.9024
ENPP2	-2.64894	2.64894	down	3.9222	-8.80267	2.77993e-13	3.54024e-10	19.5672
ADGRB2	2.5498	2.5498	up	0.111705	8.78104	3.06091e-13	3.81513e-10	19.4714
IGFBP2	2.31577	2.31577	up	5.5271	8.70921	4.21446e-13	5.03851e-10	19.1534
ACVR2B-AS1	-2.08561	2.08561	down	-1.04384	-8.70439	4.30599e-13	5.04499e-10	19.132
ACSF2	-1.82268	1.82268	down	2.9348	-8.69771	4.43584e-13	5.09522e-10	19.1024
FAM86HP	-1.93445	1.93445	down	0.463028	-8.69329	4.52403e-13	5.09658e-10	19.0829
CADM1	2.98821	2.98821	up	1.54972	8.68292	4.73792e-13	5.23683e-10	19.0369
DYSF	2.34521	2.34521	up	1.54283	8.64245	5.67342e-13	6.15471e-10	18.8577
TFAP2A	-1.51575	1.51575	down	7.36242	-8.62997	5.99749e-13	6.38798e-10	18.8025
CTC-523E23.1	-3.97065	3.97065	down	-3.97467	-8.61939	6.28685e-13	6.57661e-10	18.7556
ZNF667	-3.53747	3.53747	down	-1.50688	-8.61024	6.54832e-13	6.72995e-10	18.7151
SECTM1	2.59862	2.59862	up	1.09173	8.55972	8.20039e-13	8.28254e-10	18.4915
DLL4	2.49848	2.49848	up	1.42258	8.5266	9.50351e-13	9.43602e-10	18.3448
HTRA3	2.97704	2.97704	up	0.281842	8.47738	1.18322e-12	1.14718e-09	18.127
FBXO17	-2.31035	2.31035	down	2.46743	-8.47524	1.19455e-12	1.14718e-09	18.1175
PLEKHG4	-1.75021	1.75021	down	1.55886	-8.46597	1.24488e-12	1.17234e-09	18.0765
ARC	3.50257	3.50257	up	-1.41399	8.46312	1.26077e-12	1.17234e-09	18.0639
ISG20	3.19318	3.19318	up	2.33868	8.43134	1.45245e-12	1.30901e-09	17.9232
MANEAL	-2.01066	2.01066	down	1.06559	-8.41577	1.55667e-12	1.38168e-09	17.8543
SATB1	-2.15498	2.15498	down	1.76252	-8.39571	1.7021e-12	1.48822e-09	17.7656
HCP5	3.83653	3.83653	up	1.74224	8.35082	2.07857e-12	1.77708e-09	17.567
ADCY1	3.60609	3.60609	up	-0.18677	8.345	2.13319e-12	1.78521e-09	17.5412
RIMS2	5.90252	5.90252	up	-3.32409	8.33557	2.22462e-12	1.81e-09	17.4995
MTUS1	-2.27761	2.27761	down	1.98465	-8.27374	2.92927e-12	2.31891e-09	17.2261
RP11-4B16.3	6.63966	6.63966	up	-2.26812	8.25528	3.18019e-12	2.4513e-09	17.1445
CDH24	1.74371	1.74371	up	-0.0444671	8.22676	3.61044e-12	2.7468e-09	17.0184
TNFRSF1B	1.93624	1.93624	up	1.79945	8.22363	3.66111e-12	2.74688e-09	17.0046
CALHM2	1.99574	1.99574	up	2.57216	8.20676	3.94638e-12	2.88979e-09	16.93
S100A4	2.8566	2.8566	up	4.27535	8.20091	4.05038e-12	2.92933e-09	16.9042
PPP1R3B	-1.55288	1.55288	down	2.20394	-8.19793	4.10455e-12	2.9323e-09	16.891
RAPGEF3	-2.50324	2.50324	down	1.69018	-8.1612	4.83308e-12	3.37055e-09	16.7287
ZNF391	-2.9316	2.9316	down	-0.881848	-8.15733	4.91691e-12	3.37948e-09	16.7116
WARS	2.4453	2.4453	up	7.29232	8.15437	4.982e-12	3.37948e-09	16.6986
MMP12	5.85518	5.85518	up	-6.58215	8.15271	5.01895e-12	3.37948e-09	16.6912
RAMP2-AS1	-2.63674	2.63674	down	-2.03433	-8.13265	5.48726e-12	3.57166e-09	16.6026
ADM2	2.4116	2.4116	up	-1.08908	8.12898	5.57759e-12	3.58703e-09	16.5864
BCL3	1.57694	1.57694	up	2.69446	8.12396	5.70353e-12	3.58703e-09	16.5643
RP11-77P16.4	-2.77671	2.77671	down	-1.22904	-8.10999	6.06902e-12	3.67283e-09	16.5026
CTF1	-2.5666	2.5666	down	1.07525	-8.07514	7.08608e-12	4.23582e-09	16.3487
B4GALNT1	2.6757	2.6757	up	-2.23078	8.03093	8.62452e-12	5.05233e-09	16.1536
DCSTAMP	5.97531	5.97531	up	-3.68181	8.02444	8.87714e-12	5.14883e-09	16.125
AC022007.5	-1.66854	1.66854	down	-0.448828	-8.01892	9.09736e-12	5.22483e-09	16.1007
SLCO3A1	1.7621	1.7621	up	0.177156	7.97246	1.11831e-11	6.29918e-09	15.8957
P2RY6	2.14828	2.14828	up	-0.789795	7.95921	1.18611e-11	6.61132e-09	15.8373
LIMS2	-2.28918	2.28918	down	4.96775	-7.94809	1.24613e-11	6.81273e-09	15.7883
CLIP3	2.2496	2.2496	up	3.12794	7.93152	1.34127e-11	7.20854e-09	15.7153
AC110781.3	4.27587	4.27587	up	-0.345843	7.91229	1.46083e-11	7.77973e-09	15.6305
ENTHD1	3.98721	3.98721	up	-6.18878	7.89674	1.5652e-11	8.26046e-09	15.562
PPM1K	2.88581	2.88581	up	2.13527	7.88031	1.68359e-11	8.72798e-09	15.4897
PFKP	1.6818	1.6818	up	4.61182	7.85055	1.92127e-11	9.75483e-09	15.3586
FIBCD1	3.91125	3.91125	up	-0.414278	7.8382	2.02947e-11	1.01614e-08	15.3043
IRF1	2.57145	2.57145	up	2.33173	7.81517	2.2477e-11	1.09118e-08	15.2029
ABI3	2.02422	2.02422	up	1.01136	7.81388	2.26061e-11	1.09118e-08	15.1972
PTP4A3	2.10134	2.10134	up	6.40455	7.81348	2.26466e-11	1.09118e-08	15.1955
PPP1R14C	4.42069	4.42069	up	-5.03185	7.8127	2.27249e-11	1.09118e-08	15.192
PANX2	2.31025	2.31025	up	0.315163	7.7987	2.41802e-11	1.14234e-08	15.1305
COL5A3	1.86648	1.86648	up	-0.551539	7.79553	2.45223e-11	1.14819e-08	15.1165
IL18BP	2.50127	2.50127	up	2.25412	7.79394	2.46961e-11	1.14819e-08	15.1095
KCNJ4	4.23834	4.23834	up	-5.09593	7.76522	2.80493e-11	1.28793e-08	14.9832
WNK4	-2.48582	2.48582	down	0.747992	-7.76128	2.85429e-11	1.29618e-08	14.9659
ZNF30-AS1	-4.53911	4.53911	down	-5.94733	-7.74773	3.03099e-11	1.36583e-08	14.9063
RP11-532F12.5	-1.8813	1.8813	down	0.9905	-7.73408	3.21985e-11	1.43986e-08	14.8464
ALG1L2	-4.40041	4.40041	down	-4.8166	-7.729	3.29326e-11	1.46153e-08	14.824
MAD1L1	2.01638	2.01638	up	5.95772	7.71246	3.54356e-11	1.54914e-08	14.7513
RP11-276H19.1	-3.14488	3.14488	down	-5.02066	-7.70872	3.60266e-11	1.56332e-08	14.7349
MYO1G	2.26428	2.26428	up	-0.453568	7.70637	3.64048e-11	1.56811e-08	14.7246
GPR162	2.12417	2.12417	up	-0.215159	7.69704	3.79391e-11	1.62227e-08	14.6836
GJC3	-1.72746	1.72746	down	-0.578161	-7.66765	4.32121e-11	1.788e-08	14.5546
MAP1A	2.72302	2.72302	up	-0.34512	7.66698	4.33409e-11	1.788e-08	14.5516
THBS2	2.6113	2.6113	up	-0.228875	7.66347	4.40198e-11	1.8033e-08	14.5362
CELF2	3.20911	3.20911	up	0.915223	7.63594	4.97226e-11	1.98185e-08	14.4154
CTC-523E23.4	-4.247	4.247	down	-4.88358	-7.63191	5.06172e-11	2.00352e-08	14.3977
GRIN2D	1.77007	1.77007	up	-1.86732	7.62823	5.14469e-11	2.02269e-08	14.3816
ADAM19	2.45788	2.45788	up	-2.16263	7.61858	5.36911e-11	2.08296e-08	14.3393
AZGP1	-2.39746	2.39746	down	4.23264	-7.61108	5.55014e-11	2.13903e-08	14.3064
LINGO1	2.17218	2.17218	up	2.88724	7.59431	5.97763e-11	2.24472e-08	14.2328
SLIT1	2.38994	2.38994	up	-1.71054	7.5806	6.35121e-11	2.36981e-08	14.1727
RNF43	-2.47445	2.47445	down	0.398976	-7.57491	6.5129e-11	2.39958e-08	14.1478
PSTPIP1	1.98577	1.98577	up	0.794866	7.55393	7.14554e-11	2.59905e-08	14.0559
RP11-371A19.2	-4.66055	4.66055	down	-3.82645	-7.54664	7.37955e-11	2.65216e-08	14.0239
FABP3	1.83887	1.83887	up	6.45312	7.54325	7.49095e-11	2.67578e-08	14.0091
LAMA1	2.55662	2.55662	up	-0.412005	7.53257	7.85276e-11	2.78801e-08	13.9623
LINC01057	-1.7478	1.7478	down	1.7997	-7.52121	8.25696e-11	2.91386e-08	13.9126
HTRA1	2.35936	2.35936	up	5.29046	7.51381	8.53134e-11	2.97485e-08	13.8802
PSMB8-AS1	2.83633	2.83633	up	2.15602	7.49901	9.10755e-11	3.13841e-08	13.8154
FAM72A	1.69137	1.69137	up	0.385662	7.48493	9.69165e-11	3.30085e-08	13.7538
RBP7	-1.51803	1.51803	down	5.71521	-7.48169	9.83129e-11	3.32906e-08	13.7396
NKG7	2.92981	2.92981	up	1.5876	7.47563	1.00977e-10	3.38019e-08	13.7131
HMOX1	1.62741	1.62741	up	3.54545	7.45444	1.10872e-10	3.6212e-08	13.6205
LRRTM2	3.27868	3.27868	up	-3.88913	7.45364	1.11268e-10	3.6212e-08	13.617
CAMSAP3	-2.28125	2.28125	down	0.928899	-7.44558	1.15293e-10	3.71099e-08	13.5817
PLN	5.57842	5.57842	up	-2.22365	7.43567	1.20445e-10	3.85563e-08	13.5384
LNP1	-1.98529	1.98529	down	3.48591	-7.4194	1.29401e-10	4.09752e-08	13.4674
HLA-DMA	1.64099	1.64099	up	4.79679	7.39293	1.45419e-10	4.55551e-08	13.3517
B2M	2.10577	2.10577	up	10.5707	7.35747	1.70006e-10	5.24165e-08	13.197
DLC1	-1.54061	1.54061	down	2.86487	-7.35251	1.73755e-10	5.32919e-08	13.1754
CTC-523E23.11	-3.9242	3.9242	down	-1.07255	-7.35065	1.75187e-10	5.34511e-08	13.1672
AHNAK2	2.57448	2.57448	up	4.28861	7.34325	1.80988e-10	5.4652e-08	13.135
SEL1L3	2.9524	2.9524	up	0.758897	7.33242	1.89822e-10	5.67346e-08	13.0878
CHL1-AS2	-6.21283	6.21283	down	-1.89415	-7.31639	2.03698e-10	6.03257e-08	13.0179
TGFBI	1.90723	1.90723	up	4.16536	7.31475	2.05181e-10	6.03257e-08	13.0107
MRC2	2.2425	2.2425	up	1.69025	7.31454	2.05362e-10	6.03257e-08	13.0098
GPC4	2.7514	2.7514	up	-1.73682	7.30868	2.10731e-10	6.14172e-08	12.9843
EPHA8	3.10346	3.10346	up	-2.1351	7.30163	2.17365e-10	6.27263e-08	12.9536
IL32	2.39454	2.39454	up	3.18335	7.29508	2.2372e-10	6.42438e-08	12.925
VAX1	4.26242	4.26242	up	-6.68556	7.2898	2.2898e-10	6.54334e-08	12.902
CRHR1	4.56522	4.56522	up	-4.69425	7.26782	2.52206e-10	7.17209e-08	12.8064
SCN1B	1.88725	1.88725	up	2.69857	7.26299	2.57627e-10	7.2558e-08	12.7853
ARSH	-3.60949	3.60949	down	-6.65016	-7.21881	3.12816e-10	8.60236e-08	12.5931
GADD45G	2.33196	2.33196	up	-0.355924	7.2183	3.13511e-10	8.60236e-08	12.5909
ZIM2-AS1	-3.96462	3.96462	down	-5.66827	-7.21776	3.14249e-10	8.60236e-08	12.5886
GPR42	5.12985	5.12985	up	-4.26393	7.21366	3.19962e-10	8.718e-08	12.5708
LINC00518	-2.13942	2.13942	down	4.12095	-7.20623	3.30573e-10	8.92409e-08	12.5385
GATA6	2.9854	2.9854	up	-4.40692	7.18378	3.64798e-10	9.71374e-08	12.4409
HLA-B	2.49337	2.49337	up	8.73268	7.18141	3.68607e-10	9.77077e-08	12.4307
KCNJ6	2.87161	2.87161	up	-8.46168	7.17263	3.83085e-10	1.01088e-07	12.3925
LMCD1	-1.88692	1.88692	down	3.29923	-7.164	3.97863e-10	1.04517e-07	12.3551
FKBP11	1.65625	1.65625	up	5.65923	7.15418	4.15378e-10	1.08148e-07	12.3124
PSMB9	2.73971	2.73971	up	3.9583	7.14708	4.28516e-10	1.11075e-07	12.2816
FSTL4	1.88607	1.88607	up	0.558254	7.13936	4.4325e-10	1.13848e-07	12.2481
CD7	2.63531	2.63531	up	-0.454067	7.13844	4.45047e-10	1.13848e-07	12.2441
ARMC9	1.91239	1.91239	up	4.86714	7.13421	4.53368e-10	1.15473e-07	12.2258
ZNF492	-3.57881	3.57881	down	-6.6303	-7.12051	4.81435e-10	1.22091e-07	12.1664
GRID1	2.79417	2.79417	up	1.98886	7.11077	5.02405e-10	1.2686e-07	12.1242
LGALS1	1.56575	1.56575	up	8.62498	7.10715	5.10438e-10	1.27242e-07	12.1085
TYMP	1.87627	1.87627	up	3.91319	7.09599	5.36005e-10	1.31711e-07	12.0601
GGT1	2.37372	2.37372	up	1.77428	7.09508	5.38141e-10	1.31711e-07	12.0562
GABRD	2.16617	2.16617	up	-1.30062	7.09476	5.38909e-10	1.31711e-07	12.0548
COX7A1	1.94078	1.94078	up	3.274	7.09446	5.39604e-10	1.31711e-07	12.0535
GEM	2.71931	2.71931	up	0.931632	7.09126	5.47226e-10	1.33017e-07	12.0396
ULBP1	3.73562	3.73562	up	-4.42401	7.07987	5.75193e-10	1.37446e-07	11.9903
UCHL1	2.58491	2.58491	up	4.19115	7.07965	5.75758e-10	1.37446e-07	11.9893
SDC2	2.58999	2.58999	up	1.20233	7.07908	5.7718e-10	1.37446e-07	11.9869
NIPSNAP3B	-1.75046	1.75046	down	-0.242077	-7.07743	5.81371e-10	1.37884e-07	11.9797
EFS	-2.61665	2.61665	down	1.02925	-7.07162	5.96352e-10	1.39263e-07	11.9546
HCK	1.75131	1.75131	up	1.01872	7.06264	6.20248e-10	1.44186e-07	11.9157
TTC9B	2.83085	2.83085	up	-4.04959	7.05758	6.34109e-10	1.46825e-07	11.8938
SPON2	2.03253	2.03253	up	6.36989	7.05068	6.53558e-10	1.50733e-07	11.8639
FABP5	1.79722	1.79722	up	4.63138	7.02603	7.27924e-10	1.65302e-07	11.7573
GPR176	1.75917	1.75917	up	1.15597	7.02277	7.38365e-10	1.66054e-07	11.7432
ANKRD34A	1.66167	1.66167	up	-1.228	7.01971	7.48319e-10	1.66682e-07	11.73
NLRC5	1.93716	1.93716	up	1.87272	7.01855	7.52118e-10	1.66893e-07	11.725
ANPEP	2.42248	2.42248	up	-0.812999	7.01648	7.58955e-10	1.67775e-07	11.716
CENPVP3	-5.08444	5.08444	down	-4.34168	-7.00907	7.83913e-10	1.72211e-07	11.684
FFAR3	3.71618	3.71618	up	-0.545557	7.00878	7.849e-10	1.72211e-07	11.6828
AQP3	2.69998	2.69998	up	-2.50609	7.00774	7.88487e-10	1.72352e-07	11.6783
COLGALT2	2.33226	2.33226	up	-1.2808	7.00468	7.991e-10	1.72738e-07	11.6651
TNFRSF8	2.78742	2.78742	up	-4.10142	6.99788	8.23172e-10	1.75993e-07	11.6357
PADI1	3.29309	3.29309	up	-2.94188	6.99447	8.35515e-10	1.77983e-07	11.621
TTBK1	3.03599	3.03599	up	-6.03804	6.9892	8.55001e-10	1.81474e-07	11.5982
NECAB2	2.40724	2.40724	up	3.34906	6.976	9.0569e-10	1.91539e-07	11.5412
RP4-655J12.4	-3.92983	3.92983	down	-1.76991	-6.96537	9.48687e-10	1.9991e-07	11.4954
CLEC11A	-2.22263	2.22263	down	2.7495	-6.96115	9.66342e-10	2.02901e-07	11.4771
SLC7A7	1.51859	1.51859	up	1.22623	6.95698	9.84088e-10	2.05889e-07	11.4591
CARD11	2.71222	2.71222	up	0.218219	6.94672	1.02911e-09	2.14542e-07	11.4149
HPSE	2.56054	2.56054	up	-1.16033	6.93237	1.09555e-09	2.24401e-07	11.353
MPZ	-2.61623	2.61623	down	-0.020262	-6.90182	1.25156e-09	2.52819e-07	11.2214
SAP30	1.55701	1.55701	up	1.30188	6.88385	1.35343e-09	2.69678e-07	11.1441
MGLL	1.88465	1.88465	up	2.35749	6.88251	1.36134e-09	2.69998e-07	11.1383
CDK15	-2.36504	2.36504	down	-0.623181	-6.88202	1.36426e-09	2.69998e-07	11.1362
RP4-647J21.1	2.50331	2.50331	up	-3.65499	6.87574	1.40207e-09	2.76019e-07	11.1092
PRF1	2.54197	2.54197	up	-0.571027	6.87541	1.4041e-09	2.76019e-07	11.1077
GLI2	2.25867	2.25867	up	-3.03208	6.86465	1.47138e-09	2.87317e-07	11.0615
ST8SIA2	4.1107	4.1107	up	-4.66432	6.85138	1.55885e-09	3.0238e-07	11.0044
RARRES2P1	-4.6323	4.6323	down	-5.6277	-6.84403	1.60943e-09	3.10605e-07	10.9728
DOK7	2.1189	2.1189	up	-2.31535	6.84369	1.61185e-09	3.10605e-07	10.9713
APOBR	1.83182	1.83182	up	-0.53337	6.83783	1.65341e-09	3.155e-07	10.9462
AP000439.1	3.48422	3.48422	up	-5.97127	6.82377	1.75763e-09	3.32141e-07	10.8858
CST7	3.06847	3.06847	up	0.0412519	6.82066	1.78152e-09	3.35572e-07	10.8724
PDCD1	3.9898	3.9898	up	-3.46327	6.81857	1.79775e-09	3.3689e-07	10.8635
COX4I2	1.69572	1.69572	up	0.730282	6.81829	1.80001e-09	3.3689e-07	10.8622
RP11-783K16.5	1.58115	1.58115	up	0.4589	6.81029	1.8636e-09	3.47681e-07	10.8279
CHL1	-3.3019	3.3019	down	0.100997	-6.80133	1.9376e-09	3.58065e-07	10.7894
PHYHIP	2.43895	2.43895	up	-0.95823	6.79313	2.00784e-09	3.67566e-07	10.7543
GPR27	-2.16692	2.16692	down	1.29673	-6.78873	2.0465e-09	3.73476e-07	10.7354
GATA4	-3.89224	3.89224	down	-0.767051	-6.7876	2.05659e-09	3.74143e-07	10.7306
AC006547.14	3.36957	3.36957	up	-2.68305	6.78689	2.06292e-09	3.74143e-07	10.7275
TRBC2	3.36128	3.36128	up	1.27006	6.7854	2.07635e-09	3.75415e-07	10.7211
RASD2	1.6178	1.6178	up	0.862318	6.78167	2.11017e-09	3.76395e-07	10.7051
KIF6	-1.95047	1.95047	down	1.12605	-6.78127	2.1139e-09	3.76395e-07	10.7034
SCGB1B2P	-1.96947	1.96947	down	-0.18189	-6.78001	2.12544e-09	3.77304e-07	10.698
ZNF454	-2.86564	2.86564	down	-2.75321	-6.77812	2.14292e-09	3.77499e-07	10.6899
CD27	3.17187	3.17187	up	-0.226441	6.778	2.14408e-09	3.77499e-07	10.6894
CYSLTR2	5.89769	5.89769	up	-2.18977	6.76655	2.25329e-09	3.92857e-07	10.6403
TNFRSF9	4.36506	4.36506	up	-5.55313	6.75966	2.32166e-09	4.03575e-07	10.6108
CXCR2P1	4.40977	4.40977	up	-3.6789	6.75689	2.34969e-09	4.06038e-07	10.5989
RAB31	2.13999	2.13999	up	1.65467	6.75058	2.41486e-09	4.1364e-07	10.5719
CPS1	-2.90187	2.90187	down	-0.349622	-6.74715	2.45109e-09	4.14993e-07	10.5572
SETBP1	1.86154	1.86154	up	-2.38546	6.74071	2.52047e-09	4.2551e-07	10.5296
STEAP1	-1.63252	1.63252	down	-0.128006	-6.73886	2.54072e-09	4.27696e-07	10.5217
RAB7B	1.9762	1.9762	up	-1.90595	6.73682	2.56329e-09	4.30258e-07	10.513
SLC25A21-AS1	-3.04633	3.04633	down	-1.33486	-6.7348	2.58579e-09	4.32795e-07	10.5044
GREB1L	3.70626	3.70626	up	-4.9713	6.73259	2.61073e-09	4.35725e-07	10.4949
SLC29A4	1.72744	1.72744	up	1.2475	6.73062	2.63308e-09	4.38206e-07	10.4865
BATF3	1.72636	1.72636	up	-0.464868	6.72951	2.6458e-09	4.39076e-07	10.4817
CD74	2.05581	2.05581	up	8.81435	6.72876	2.65436e-09	4.39251e-07	10.4785
TAP1	2.13814	2.13814	up	4.59809	6.72675	2.67756e-09	4.41843e-07	10.4699
KCNQ2	3.52121	3.52121	up	-1.7398	6.71616	2.80325e-09	4.59993e-07	10.4246
IL21R	3.313	3.313	up	-3.87266	6.71524	2.81445e-09	4.6054e-07	10.4207
PARP8	2.36099	2.36099	up	0.928503	6.71188	2.85566e-09	4.65982e-07	10.4063
SSUH2	-3.08946	3.08946	down	0.0366608	-6.70672	2.92025e-09	4.75197e-07	10.3842
CD209	2.36795	2.36795	up	0.182957	6.69264	3.10368e-09	5.03647e-07	10.3241
FOXF1	2.44585	2.44585	up	-3.89786	6.6872	3.17761e-09	5.14219e-07	10.3008
IL12RB2	-2.85043	2.85043	down	1.56794	-6.66591	3.48413e-09	5.57661e-07	10.2099
MAN1C1	1.76159	1.76159	up	2.41243	6.66242	3.5371e-09	5.60561e-07	10.195
SLC2A3	1.91138	1.91138	up	1.0269	6.66219	3.54052e-09	5.60561e-07	10.194
NEDD9	-1.70661	1.70661	down	2.80441	-6.65403	3.66771e-09	5.77575e-07	10.1592
SSX5	5.64142	5.64142	up	-1.77797	6.64539	3.8071e-09	5.96319e-07	10.1223
NQO1	2.03347	2.03347	up	5.18803	6.641	3.88002e-09	6.06122e-07	10.1036
COL9A3	2.65352	2.65352	up	3.3829	6.63508	3.98053e-09	6.20169e-07	10.0784
ADCY2	2.99986	2.99986	up	-1.13663	6.62171	4.217e-09	6.55269e-07	10.0214
ITGAX	2.06893	2.06893	up	1.14865	6.61775	4.28982e-09	6.63066e-07	10.0045
AC133644.2	4.86987	4.86987	up	-4.62253	6.60755	4.48285e-09	6.89265e-07	9.96105
C1QB	2.09489	2.09489	up	6.01489	6.60352	4.56145e-09	6.99514e-07	9.9439
RP3-508I15.9	-1.74233	1.74233	down	-0.0991835	-6.59648	4.7021e-09	7.17327e-07	9.91392
SLCO5A1	3.4275	3.4275	up	-1.93146	6.58967	4.84214e-09	7.36772e-07	9.88496
SMIM10L2A	-1.55161	1.55161	down	0.340976	-6.58822	4.87246e-09	7.39465e-07	9.8788
ADAM11	1.72493	1.72493	up	0.448916	6.57817	5.08815e-09	7.66244e-07	9.83605
FEZ1	1.7374	1.7374	up	2.26253	6.57513	5.15528e-09	7.74363e-07	9.82311
ISG15	2.29446	2.29446	up	5.07194	6.57255	5.2129e-09	7.79023e-07	9.81214
CCL5	2.65715	2.65715	up	2.03314	6.57186	5.22838e-09	7.79348e-07	9.80922
AFAP1L2	1.70657	1.70657	up	-0.680975	6.56959	5.27989e-09	7.85028e-07	9.79954
CENPVP1	-3.55227	3.55227	down	-2.87172	-6.56334	5.42385e-09	8.02359e-07	9.773
SORBS2	-2.38954	2.38954	down	2.9141	-6.56152	5.46666e-09	8.06656e-07	9.76524
RP11-211G23.2	5.25006	5.25006	up	-6.43663	6.55581	5.60263e-09	8.22576e-07	9.74099
XIRP1	2.87369	2.87369	up	-7.49562	6.55163	5.70453e-09	8.35443e-07	9.72321
SIRPG	4.99137	4.99137	up	-3.74159	6.5413	5.96394e-09	8.66933e-07	9.67933
CORO1A	1.88161	1.88161	up	2.65111	6.53514	6.12419e-09	8.84311e-07	9.65317
TSGA10IP	-4.74727	4.74727	down	-3.82872	-6.53474	6.13458e-09	8.84311e-07	9.65149
CA12	3.21014	3.21014	up	-1.33605	6.53439	6.14388e-09	8.84311e-07	9.65
ADAMTS19-AS1	3.64953	3.64953	up	-7.60432	6.53342	6.16956e-09	8.85831e-07	9.64588
CTD-2554C21.2	-4.3883	4.3883	down	-2.49656	-6.52612	6.36636e-09	9.09628e-07	9.6149
ZNF826P	-2.94237	2.94237	down	-2.4707	-6.52195	6.48155e-09	9.21592e-07	9.59721
AK4	1.81967	1.81967	up	0.817971	6.52134	6.49875e-09	9.21799e-07	9.5946
RP11-367O10.1	-4.00596	4.00596	down	-7.56044	-6.51991	6.53864e-09	9.24116e-07	9.58856
NFATC4	2.45522	2.45522	up	2.34546	6.5196	6.54733e-09	9.24116e-07	9.58725
AMZ1	3.02743	3.02743	up	-2.84905	6.51907	6.5624e-09	9.24116e-07	9.58498
CD300A	1.81472	1.81472	up	0.161378	6.50597	6.94253e-09	9.68334e-07	9.52943
MYOM3	3.18238	3.18238	up	-7.495	6.50426	6.99379e-09	9.7194e-07	9.52218
PCED1B	2.03191	2.03191	up	-1.01648	6.504	7.00157e-09	9.7194e-07	9.52108
PSMB8	1.71929	1.71929	up	5.72294	6.50075	7.10011e-09	9.79349e-07	9.50729
SORL1	2.09577	2.09577	up	-0.633816	6.49585	7.25124e-09	9.94812e-07	9.48652
PDE4B	-2.1668	2.1668	down	0.663441	-6.49084	7.40887e-09	1.01406e-06	9.4653
C1QC	1.9225	1.9225	up	5.66235	6.48959	7.4488e-09	1.01715e-06	9.46
COL6A6	-2.70913	2.70913	down	-7.01609	-6.48136	7.71677e-09	1.05129e-06	9.42514
ZNF98	-4.61478	4.61478	down	-6.42656	-6.47235	8.02093e-09	1.08152e-06	9.38701
TMEM255A	3.15702	3.15702	up	-1.01919	6.47206	8.03099e-09	1.08152e-06	9.38577
CNTNAP1	1.50682	1.50682	up	1.75333	6.46105	8.41954e-09	1.12866e-06	9.33918
CTD-3162L10.5	-3.94549	3.94549	down	-6.77332	-6.45782	8.53704e-09	1.13916e-06	9.32551
TRABD2B	2.55228	2.55228	up	-3.64039	6.45207	8.75031e-09	1.15711e-06	9.30117
NPAS1	1.75987	1.75987	up	-1.06307	6.4506	8.80567e-09	1.16112e-06	9.29495
KLHL38	1.68489	1.68489	up	1.92692	6.45021	8.82027e-09	1.16112e-06	9.29332
SERPINB8	1.60466	1.60466	up	0.0920354	6.44531	9.00759e-09	1.18234e-06	9.2726
SOCS2	2.05149	2.05149	up	0.732562	6.43957	9.232e-09	1.20719e-06	9.24833
ZNF90	-1.51714	1.51714	down	-1.28403	-6.43524	9.40486e-09	1.22705e-06	9.23004
MAPK12	1.75327	1.75327	up	3.30739	6.43051	9.59747e-09	1.2494e-06	9.21005
CD3E	3.25874	3.25874	up	0.016462	6.42503	9.82574e-09	1.27346e-06	9.18687
SHC4	-2.49176	2.49176	down	-0.105222	-6.42042	1.00215e-08	1.29026e-06	9.16742
ANG	-1.73355	1.73355	down	1.42641	-6.41964	1.0055e-08	1.29174e-06	9.16413
ZNF135	-1.66404	1.66404	down	0.326794	-6.41778	1.01355e-08	1.29799e-06	9.15627
HLA-DRB1	2.20666	2.20666	up	5.23904	6.41749	1.0148e-08	1.29799e-06	9.15506
RP11-1081L13.4	-1.65073	1.65073	down	0.237182	-6.41429	1.02882e-08	1.31306e-06	9.14152
LHFP	1.64894	1.64894	up	1.67491	6.40996	1.04808e-08	1.32846e-06	9.12324
MTCL1	1.79082	1.79082	up	-0.713199	6.40954	1.04996e-08	1.32846e-06	9.12147
FST	2.98066	2.98066	up	-3.09681	6.40748	1.05926e-08	1.33734e-06	9.11278
CA8	3.69133	3.69133	up	-2.53232	6.40167	1.08591e-08	1.36803e-06	9.08828
HLA-A	1.51639	1.51639	up	9.98981	6.39843	1.10111e-08	1.38421e-06	9.07458
PRR5L	1.65116	1.65116	up	-0.357346	6.3955	1.11499e-08	1.39865e-06	9.06223
FOXS1	1.64729	1.64729	up	-0.469749	6.39373	1.12346e-08	1.40627e-06	9.05476
ERVMER34-1	2.264	2.264	up	-1.93038	6.38727	1.15493e-08	1.44258e-06	9.02753
COL4A2	1.61793	1.61793	up	3.38356	6.38025	1.19013e-08	1.48338e-06	8.99794
Z95704.3	-3.66012	3.66012	down	-7.49996	-6.3793	1.195e-08	1.48629e-06	8.99392
C1R	2.10617	2.10617	up	3.67492	6.37718	1.20587e-08	1.48976e-06	8.98499
LINC00941	3.69168	3.69168	up	-6.90285	6.37715	1.20601e-08	1.48976e-06	8.98487
SUSD2	1.80224	1.80224	up	1.00912	6.3744	1.22026e-08	1.50177e-06	8.97329
RP11-223C24.1	4.39528	4.39528	up	-6.44724	6.3735	1.22498e-08	1.5042e-06	8.96949
ETV7	2.81026	2.81026	up	0.0386	6.37305	1.22737e-08	1.5042e-06	8.96756
CELF5	-1.79718	1.79718	down	-0.706256	-6.37013	1.24274e-08	1.51696e-06	8.9553
OR2I1P	4.35311	4.35311	up	-3.93722	6.37009	1.24296e-08	1.51696e-06	8.95512
SIPA1L2	2.07474	2.07474	up	0.775367	6.36896	1.24902e-08	1.52118e-06	8.95033
LST1	1.70173	1.70173	up	2.5113	6.36713	1.25883e-08	1.52994e-06	8.94262
HPGD	-3.49423	3.49423	down	0.0485671	-6.34942	1.35773e-08	1.63657e-06	8.86808
IL2RG	2.40406	2.40406	up	0.969244	6.34339	1.39313e-08	1.67236e-06	8.84271
SPN	2.43458	2.43458	up	-1.45291	6.34138	1.40514e-08	1.68123e-06	8.83426
RNF208	-1.65822	1.65822	down	1.98384	-6.3412	1.40627e-08	1.68123e-06	8.83346
CTD-2554C21.3	-3.04359	3.04359	down	-2.91916	-6.34062	1.40971e-08	1.68192e-06	8.83105
CDC25B	1.53589	1.53589	up	3.56565	6.33792	1.42607e-08	1.69798e-06	8.81968
UNC5D	3.94803	3.94803	up	-5.45744	6.32445	1.51047e-08	1.78757e-06	8.76302
IL12RB1	2.37319	2.37319	up	-1.01385	6.32287	1.52067e-08	1.79255e-06	8.75639
HLA-C	1.8002	1.8002	up	8.578	6.32285	1.5208e-08	1.79255e-06	8.75631
GPBAR1	2.01549	2.01549	up	-2.01223	6.31877	1.54747e-08	1.82032e-06	8.73918
TENM4	2.89681	2.89681	up	-3.45117	6.31685	1.56018e-08	1.82429e-06	8.73111
NCF1	1.79214	1.79214	up	1.2929	6.30554	1.63729e-08	1.90684e-06	8.68359
CD79B	1.77288	1.77288	up	4.43041	6.30394	1.64846e-08	1.91225e-06	8.67688
AHCYL2	-1.82778	1.82778	down	5.04992	-6.30016	1.67524e-08	1.9296e-06	8.66101
BANCR	2.92325	2.92325	up	2.8335	6.29997	1.67659e-08	1.9296e-06	8.66021
TOX2	1.81811	1.81811	up	-0.514435	6.29665	1.7005e-08	1.95327e-06	8.64626
RP11-560J1.2	-1.50877	1.50877	down	-1.59148	-6.29504	1.7122e-08	1.96286e-06	8.63951
SLAMF8	2.29295	2.29295	up	-0.170308	6.29421	1.71829e-08	1.96427e-06	8.63601
ZNF204P	-3.32401	3.32401	down	-2.87493	-6.29396	1.72013e-08	1.96427e-06	8.63496
RP11-63E9.1	-4.03767	4.03767	down	-1.58662	-6.29133	1.73952e-08	1.98254e-06	8.62392
ZNF571-AS1	-2.38515	2.38515	down	-0.160082	-6.28964	1.75204e-08	1.99294e-06	8.61685
C1QA	1.82078	1.82078	up	6.07606	6.28259	1.80547e-08	2.04577e-06	8.58726
GMFG	1.50208	1.50208	up	2.42039	6.28114	1.81666e-08	2.05448e-06	8.58117
MUC12	4.15741	4.15741	up	-3.79166	6.27154	1.8924e-08	2.1319e-06	8.54093
SCRG1	3.71931	3.71931	up	-5.41088	6.26541	1.94242e-08	2.18405e-06	8.51523
TNFRSF19	2.82668	2.82668	up	1.31412	6.25832	2.00192e-08	2.22955e-06	8.48552
PTPN6	1.68628	1.68628	up	2.20121	6.25758	2.00827e-08	2.23238e-06	8.48239
ZNF883	-3.2602	3.2602	down	-2.45359	-6.255	2.03037e-08	2.24932e-06	8.47162
TPPP	1.53389	1.53389	up	1.18524	6.25446	2.03502e-08	2.24932e-06	8.46936
SIGLEC10	2.54493	2.54493	up	-1.50737	6.25193	2.0571e-08	2.26943e-06	8.45873
SLC1A4	1.69376	1.69376	up	3.69859	6.24564	2.11283e-08	2.30918e-06	8.43241
RCOR2	1.68814	1.68814	up	1.68721	6.24275	2.13897e-08	2.33339e-06	8.4203
TRIM67	2.37964	2.37964	up	-4.85333	6.2353	2.20778e-08	2.38184e-06	8.38911
HFE	-1.97597	1.97597	down	-0.319616	-6.22585	2.29816e-08	2.47025e-06	8.3496
RP11-803D5.1	2.79928	2.79928	up	-7.31239	6.22049	2.35106e-08	2.52248e-06	8.32719
ZNF208	-4.21414	4.21414	down	-2.80582	-6.21636	2.3927e-08	2.55779e-06	8.30991
FN1	1.79248	1.79248	up	4.23439	6.21129	2.44472e-08	2.6039e-06	8.28873
MAL2	4.17467	4.17467	up	-2.75531	6.20804	2.47875e-08	2.62962e-06	8.27512
LGI2	1.59682	1.59682	up	-3.02676	6.20769	2.48234e-08	2.62962e-06	8.27369
RP11-403A3.3	4.09775	4.09775	up	-7.33584	6.20498	2.51107e-08	2.65047e-06	8.26236
PTPN7	2.52745	2.52745	up	-1.64603	6.20369	2.52485e-08	2.66022e-06	8.25698
HES6	1.67171	1.67171	up	5.60718	6.20176	2.54559e-08	2.67726e-06	8.24892
GDF11	1.97951	1.97951	up	3.31148	6.20098	2.55402e-08	2.68131e-06	8.24566
IL15RA	1.58691	1.58691	up	-0.600422	6.19543	2.61491e-08	2.74032e-06	8.22247
NTNG2	2.138	2.138	up	-1.69915	6.19449	2.62539e-08	2.74244e-06	8.21853
CAMK1D	1.79995	1.79995	up	-1.10209	6.19441	2.62629e-08	2.74244e-06	8.21819
CTSW	2.50846	2.50846	up	-0.428732	6.19161	2.65764e-08	2.76531e-06	8.20651
GRIN2A	3.94196	3.94196	up	-3.86047	6.18935	2.68322e-08	2.78698e-06	8.19708
TLCD1	1.66278	1.66278	up	3.09997	6.17686	2.82914e-08	2.91785e-06	8.14495
RASSF5	1.8755	1.8755	up	-0.841225	6.17643	2.83424e-08	2.91797e-06	8.14317
UBD	3.07909	3.07909	up	0.355142	6.17434	2.85952e-08	2.93883e-06	8.13443
BCAT1	2.16457	2.16457	up	-1.39388	6.15658	3.08282e-08	3.14625e-06	8.06042
PLEKHO1	1.56104	1.56104	up	2.97745	6.15336	3.12516e-08	3.18391e-06	8.04699
SLC16A6	2.14079	2.14079	up	2.20032	6.15237	3.13835e-08	3.1918e-06	8.04285
ALDH1L1	-2.01115	2.01115	down	3.01545	-6.15036	3.16513e-08	3.21346e-06	8.03448
BAALC	1.78502	1.78502	up	-1.82879	6.14964	3.17477e-08	3.21767e-06	8.03149
RP11-713M15.2	2.18525	2.18525	up	-2.04619	6.14302	3.26489e-08	3.29192e-06	8.00394
PSD2	3.18088	3.18088	up	-3.8491	6.14079	3.29591e-08	3.31748e-06	7.99464
RP11-666A20.3	-5.59536	5.59536	down	-2.79592	-6.13917	3.3186e-08	3.33459e-06	7.98789
TNFAIP8L2	1.64307	1.64307	up	0.0770886	6.1345	3.38479e-08	3.37792e-06	7.96845
FCER1G	1.5306	1.5306	up	4.58866	6.1305	3.44255e-08	3.42973e-06	7.9518
APOL1	2.68605	2.68605	up	1.80925	6.12225	3.56466e-08	3.53934e-06	7.9175
BNIP3P30	-3.78662	3.78662	down	-7.45325	-6.12133	3.57851e-08	3.54476e-06	7.91368
RP11-10A14.9	-3.912	3.912	down	-3.18512	-6.12074	3.58741e-08	3.54476e-06	7.91124
WAS	1.58037	1.58037	up	0.889734	6.11881	3.61681e-08	3.56694e-06	7.9032
NCF1C	1.82333	1.82333	up	0.39412	6.11312	3.70483e-08	3.64148e-06	7.87955
SLC47A1	1.81742	1.81742	up	-0.190194	6.11076	3.74191e-08	3.67178e-06	7.86975
RP11-255H23.2	-3.54146	3.54146	down	-3.91783	-6.10218	3.88003e-08	3.78197e-06	7.83408
SYNPR	-3.90588	3.90588	down	1.56906	-6.10088	3.90142e-08	3.79649e-06	7.82867
GPR156	-1.71612	1.71612	down	-2.20766	-6.09931	3.92741e-08	3.80588e-06	7.82214
GZMK	3.88755	3.88755	up	-1.79099	6.09883	3.93528e-08	3.80588e-06	7.82017
PPP2R2B	2.98779	2.98779	up	-2.39382	6.09812	3.94708e-08	3.80929e-06	7.81722
CD163L1	2.32275	2.32275	up	-0.391642	6.09738	3.95951e-08	3.815e-06	7.81413
RP11-466F5.6	-3.60925	3.60925	down	-5.5373	-6.09077	4.07152e-08	3.90366e-06	7.78669
SERPINB9	-1.58797	1.58797	down	2.55521	-6.08722	4.13302e-08	3.94434e-06	7.77194
PCOLCE2	-1.54922	1.54922	down	0.698132	-6.08325	4.20273e-08	3.98815e-06	7.75548
TMEM155	3.99076	3.99076	up	-5.54758	6.08315	4.20458e-08	3.98815e-06	7.75505
CXCR3	3.35264	3.35264	up	-1.93946	6.08074	4.24752e-08	4.00683e-06	7.74505
HILS1	-1.58984	1.58984	down	2.5538	-6.07957	4.26842e-08	4.01362e-06	7.74023
AC106706.1	-4.8803	4.8803	down	-5.72607	-6.07768	4.30269e-08	4.03936e-06	7.73236
TMEM119	2.40347	2.40347	up	0.575424	6.07373	4.37494e-08	4.07767e-06	7.71598
TRAV12-2	5.48865	5.48865	up	-5.28434	6.07355	4.3783e-08	4.07767e-06	7.71522
F5	3.6442	3.6442	up	-3.89254	6.07315	4.38569e-08	4.07807e-06	7.71356
CD6	1.73852	1.73852	up	-0.61513	6.07004	4.44341e-08	4.11866e-06	7.7007
EMILIN3	1.84673	1.84673	up	-0.578622	6.0663	4.51412e-08	4.17759e-06	7.68517
DPYS	4.8142	4.8142	up	-4.54582	6.06359	4.566e-08	4.21894e-06	7.67393
ZNF793-AS1	-2.52733	2.52733	down	0.28589	-6.06301	4.57717e-08	4.2226e-06	7.67153
ZSCAN1	-4.06861	4.06861	down	-3.57918	-6.06005	4.63466e-08	4.2643e-06	7.65925
RPL23AP49	-2.06962	2.06962	down	0.692947	-6.05993	4.63693e-08	4.2643e-06	7.65877
RP11-736K20.5	1.56975	1.56975	up	-2.18279	6.05703	4.69396e-08	4.30324e-06	7.64675
RP11-557H15.4	4.20891	4.20891	up	-1.86162	6.05534	4.7275e-08	4.32073e-06	7.63974
DNAH17-AS1	3.81746	3.81746	up	-5.59706	6.05518	4.73055e-08	4.32073e-06	7.63911
FABP5P7	1.70639	1.70639	up	3.85712	6.05352	4.76391e-08	4.34019e-06	7.6322
TRBV25-1	3.48274	3.48274	up	-0.0346304	6.04771	4.88187e-08	4.44076e-06	7.60814
PLEKHG6	2.80412	2.80412	up	-3.44509	6.04524	4.93279e-08	4.48012e-06	7.59794
CD8B	3.87127	3.87127	up	-2.39916	6.04369	4.96516e-08	4.50254e-06	7.5915
SATB1-AS1	-3.51676	3.51676	down	-1.80884	-6.04242	4.99173e-08	4.51964e-06	7.58626
KCP	1.72326	1.72326	up	-4.24471	6.03839	5.07713e-08	4.57504e-06	7.56957
ROBO1	-2.23776	2.23776	down	1.08628	-6.03822	5.08075e-08	4.57504e-06	7.56887
TYROBP	1.59597	1.59597	up	5.64887	6.0367	5.11337e-08	4.59427e-06	7.56258
FBXL7	2.19659	2.19659	up	0.346153	6.0361	5.12634e-08	4.59887e-06	7.56009
LAPTM5	1.77203	1.77203	up	3.79523	6.02823	5.29886e-08	4.71751e-06	7.52754
NFAM1	1.54368	1.54368	up	-1.11754	6.02768	5.31118e-08	4.71947e-06	7.52525
RP11-620J15.4	-2.6627	2.6627	down	-1.30737	-6.0263	5.342e-08	4.72127e-06	7.51956
GZMA	3.08413	3.08413	up	-0.590035	6.02163	5.44815e-08	4.78498e-06	7.50022
RAC2	1.81567	1.81567	up	2.57046	6.0181	5.5296e-08	4.83468e-06	7.48562
GBP1P1	4.24987	4.24987	up	-4.33942	6.01775	5.53776e-08	4.83468e-06	7.48417
FJX1	1.57497	1.57497	up	0.819924	6.01548	5.59073e-08	4.87367e-06	7.47481
CTC-260E6.4	-2.71722	2.71722	down	-3.36046	-6.00094	5.94303e-08	5.14078e-06	7.41473
EPHB2	1.86527	1.86527	up	-1.6839	6.00067	5.9498e-08	5.14078e-06	7.41361
FSD1	3.59279	3.59279	up	-4.64023	5.99986	5.96998e-08	5.15063e-06	7.41028
CLCNKB	1.59954	1.59954	up	-0.325972	5.98866	6.25747e-08	5.35137e-06	7.36404
CD8A	3.26283	3.26283	up	-0.954848	5.97865	6.52578e-08	5.55308e-06	7.32277
LINC00963	1.51337	1.51337	up	3.12438	5.97512	6.62336e-08	5.61403e-06	7.30818
ITGAL	2.34677	2.34677	up	-0.440522	5.97482	6.63168e-08	5.61403e-06	7.30695
RP11-473M20.11	-4.50542	4.50542	down	-5.95067	-5.97303	6.68155e-08	5.64808e-06	7.29958
LINC00900	2.35433	2.35433	up	-0.63179	5.97194	6.71205e-08	5.66496e-06	7.29511
PYGM	1.54077	1.54077	up	-0.970233	5.97163	6.72086e-08	5.66496e-06	7.29382
HMGN2P15	-4.70615	4.70615	down	-2.56955	-5.96729	6.84441e-08	5.76081e-06	7.27591
SLA2	2.80952	2.80952	up	-3.33718	5.96524	6.90341e-08	5.78553e-06	7.26748
ADAMTS2	2.79688	2.79688	up	0.485005	5.9644	6.92765e-08	5.79755e-06	7.26403
TCHH	2.29553	2.29553	up	-4.64394	5.96214	6.99364e-08	5.84443e-06	7.25471
ADAMDEC1	4.97939	4.97939	up	-4.14655	5.96018	7.0513e-08	5.86866e-06	7.24664
LHB	1.5069	1.5069	up	0.5652	5.96014	7.05269e-08	5.86866e-06	7.24645
FAM163A	2.41272	2.41272	up	-3.75421	5.95771	7.1248e-08	5.91187e-06	7.23645
SLC1A1	2.39689	2.39689	up	-1.60883	5.95064	7.33902e-08	6.0468e-06	7.20734
PDLIM4	1.93464	1.93464	up	0.702506	5.94881	7.3956e-08	6.07632e-06	7.19979
ZYG11AP1	-3.94586	3.94586	down	-5.71057	-5.9474	7.43928e-08	6.0951e-06	7.194
2021-03-04	2.65234	2.65234	up	-6.30972	5.94707	7.44967e-08	6.0951e-06	7.19263
ANKRD33B	2.57855	2.57855	up	-3.7083	5.94385	7.55069e-08	6.16914e-06	7.17939
DOK2	1.81485	1.81485	up	0.110339	5.94254	7.59233e-08	6.19452e-06	7.17399
IL1R2	2.43319	2.43319	up	-2.02988	5.94127	7.63267e-08	6.21877e-06	7.16878
PHLDA2	1.66023	1.66023	up	3.44956	5.93558	7.81673e-08	6.35989e-06	7.14537
HK3	1.55235	1.55235	up	-1.09026	5.9314	7.95452e-08	6.46302e-06	7.1282
ME1	2.45112	2.45112	up	-0.712915	5.92831	8.05807e-08	6.52003e-06	7.11549
RP11-893F2.14	-2.47833	2.47833	down	-1.1349	-5.92726	8.09361e-08	6.53135e-06	7.11116
LINC01270	2.83476	2.83476	up	-2.00653	5.92582	8.14271e-08	6.56132e-06	7.10522
CD2	3.15377	3.15377	up	-1.09559	5.9217	8.284e-08	6.666e-06	7.08832
ATP6V0D2	4.06422	4.06422	up	-4.22257	5.91812	8.40897e-08	6.75728e-06	7.0736
UCP2	1.62308	1.62308	up	3.38959	5.91505	8.51782e-08	6.8167e-06	7.06097
AC011298.2	2.54937	2.54937	up	-7.07825	5.91064	8.67609e-08	6.93389e-06	7.04288
VTN	2.80751	2.80751	up	1.39365	5.90406	8.91821e-08	7.11768e-06	7.01584
TRPM2	2.04095	2.04095	up	1.84999	5.89758	9.16261e-08	7.29355e-06	6.98928
CHI3L2	2.82802	2.82802	up	-1.55221	5.89756	9.16347e-08	7.29355e-06	6.98919
FOSL1	1.79031	1.79031	up	0.993781	5.89708	9.18211e-08	7.29847e-06	6.98719
CCBE1	3.2162	3.2162	up	-7.21456	5.89431	9.28862e-08	7.37313e-06	6.97586
IKZF1	1.84715	1.84715	up	-1.57389	5.89332	9.3271e-08	7.39365e-06	6.9718
RP11-557H15.3	3.9387	3.9387	up	-6.7144	5.89126	9.40767e-08	7.43739e-06	6.96335
TRPV2	2.50816	2.50816	up	4.76446	5.89064	9.4321e-08	7.44666e-06	6.9608
TPTE2P2	-3.11959	3.11959	down	-3.79411	-5.88417	9.69026e-08	7.62991e-06	6.93428
RASAL3	2.01006	2.01006	up	-0.95308	5.87404	1.0109e-07	7.9383e-06	6.89272
IFI27	2.93899	2.93899	up	5.22113	5.87014	1.02745e-07	8.03723e-06	6.87678
FRMPD3	3.23423	3.23423	up	-5.3319	5.8701	1.02762e-07	8.03723e-06	6.87662
RP11-48B3.4	2.08025	2.08025	up	0.718257	5.85594	1.09011e-07	8.51053e-06	6.81864
INPP5J	1.72731	1.72731	up	-0.902806	5.85574	1.09104e-07	8.51053e-06	6.8178
CD300LF	2.63042	2.63042	up	-1.95224	5.85333	1.10202e-07	8.57067e-06	6.80796
HOGA1	1.65605	1.65605	up	1.52742	5.85309	1.10314e-07	8.57067e-06	6.80697
IRX1	3.41338	3.41338	up	-1.58076	5.85175	1.10931e-07	8.5882e-06	6.8015
GZMB	2.94872	2.94872	up	-1.49249	5.85165	1.10979e-07	8.5882e-06	6.80107
C12orf75	1.92148	1.92148	up	-0.120309	5.85117	1.112e-07	8.5939e-06	6.79912
SHISA2	2.97836	2.97836	up	-5.17094	5.84602	1.13612e-07	8.74577e-06	6.77804
TXNDC2	2.76578	2.76578	up	-7.36552	5.84131	1.15859e-07	8.88369e-06	6.75881
TRPC3	3.01049	3.01049	up	-6.29042	5.83937	1.16798e-07	8.93598e-06	6.75088
NPTX1	2.805	2.805	up	-2.32934	5.83928	1.16846e-07	8.93598e-06	6.75048
RASL11B	2.55858	2.55858	up	-2.24315	5.83769	1.17623e-07	8.98364e-06	6.74398
RP11-129M16.4	2.0796	2.0796	up	-1.56231	5.8344	1.19241e-07	9.09535e-06	6.73056
ITPKA	2.34957	2.34957	up	-3.03033	5.83205	1.20413e-07	9.14902e-06	6.72096
TRAC	2.64883	2.64883	up	1.47375	5.82992	1.21485e-07	9.19473e-06	6.71225
APOL3	2.2214	2.2214	up	1.00084	5.82737	1.2278e-07	9.26754e-06	6.70184
OR2L1P	-2.78885	2.78885	down	-8.42669	-5.8271	1.22922e-07	9.26754e-06	6.70071
KLC3	-1.77633	1.77633	down	2.02919	-5.82299	1.2504e-07	9.41509e-06	6.68394
REEP1	1.93606	1.93606	up	-0.416486	5.81555	1.28967e-07	9.64895e-06	6.65358
RP11-156K13.1	-3.83986	3.83986	down	-7.22618	-5.81449	1.29536e-07	9.679e-06	6.64926
RP11-326C3.2	2.98894	2.98894	up	-2.27311	5.81153	1.31142e-07	9.7488e-06	6.63716
NLRP11	-3.1069	3.1069	down	-7.09393	-5.80592	1.34235e-07	9.94057e-06	6.61427
MORN3	1.8503	1.8503	up	-3.40446	5.80563	1.34394e-07	9.94057e-06	6.61311
NNMT	1.53468	1.53468	up	1.54102	5.80388	1.35379e-07	1.00008e-05	6.60595
GBX2	4.24502	4.24502	up	-3.95196	5.80287	1.35946e-07	1.0021e-05	6.60184
RP1-290I10.7	-3.71061	3.71061	down	-3.14356	-5.79762	1.38943e-07	1.02254e-05	6.58044
CIITA	1.89264	1.89264	up	-0.910181	5.79201	1.4222e-07	1.04534e-05	6.55756
LEKR1	-2.97365	2.97365	down	-2.91673	-5.79069	1.43002e-07	1.04977e-05	6.55218
FOXD1	3.20792	3.20792	up	-2.37188	5.79006	1.43375e-07	1.05075e-05	6.54962
LY9	2.84102	2.84102	up	-2.85565	5.78986	1.43493e-07	1.05075e-05	6.54881
CMB9-22P13.1	2.28362	2.28362	up	0.566885	5.78418	1.46912e-07	1.07344e-05	6.5257
AIF1	1.5389	1.5389	up	3.48999	5.78152	1.48546e-07	1.08368e-05	6.51485
CD70	4.32905	4.32905	up	-2.04135	5.78007	1.4944e-07	1.08885e-05	6.50896
SERPINE1	1.82597	1.82597	up	-0.507319	5.77661	1.51602e-07	1.10323e-05	6.49486
KCTD8	3.60542	3.60542	up	-6.43198	5.77196	1.54555e-07	1.11916e-05	6.47592
FOXD2	1.94438	1.94438	up	-1.53835	5.76893	1.56508e-07	1.1305e-05	6.4636
GBP1	3.00467	3.00467	up	-0.0668418	5.76752	1.57424e-07	1.13494e-05	6.45788
ACAN	2.90241	2.90241	up	-1.54219	5.76739	1.5751e-07	1.13494e-05	6.45734
RNASE6	1.6357	1.6357	up	1.86361	5.76087	1.61823e-07	1.16046e-05	6.43083
NINJ2	1.59545	1.59545	up	-0.734041	5.76076	1.61896e-07	1.16046e-05	6.43039
ABCC3	1.81267	1.81267	up	-1.82067	5.75654	1.64751e-07	1.17555e-05	6.41323
MATK	2.52437	2.52437	up	1.46813	5.75312	1.67107e-07	1.18514e-05	6.3993
AC005083.1	4.14508	4.14508	up	-6.66054	5.75239	1.67613e-07	1.1873e-05	6.39634
MYCN	1.89688	1.89688	up	-2.67962	5.75024	1.69112e-07	1.19387e-05	6.3876
FOXL2	1.69241	1.69241	up	-3.48798	5.74972	1.69477e-07	1.19387e-05	6.38549
SH2D5	1.83583	1.83583	up	-0.736937	5.7496	1.6956e-07	1.19387e-05	6.38501
C1S	2.11875	2.11875	up	2.78112	5.74697	1.71412e-07	1.1997e-05	6.37435
CRIP1	1.79544	1.79544	up	3.89954	5.7431	1.74187e-07	1.21351e-05	6.35859
CCL4	2.56275	2.56275	up	0.0188038	5.74298	1.7427e-07	1.21351e-05	6.35812
GALNT18	1.90067	1.90067	up	1.832	5.74277	1.7442e-07	1.21351e-05	6.35728
RP11-434H14.1	-4.6907	4.6907	down	-6.61751	-5.7386	1.77458e-07	1.23171e-05	6.34034
AIM2	4.13507	4.13507	up	-5.24939	5.73694	1.78681e-07	1.23873e-05	6.3336
AMN	1.96803	1.96803	up	2.10638	5.72924	1.84462e-07	1.27224e-05	6.30236
COL4A1	1.59278	1.59278	up	2.3157	5.72802	1.85397e-07	1.27623e-05	6.2974
CLUHP3	-1.84138	1.84138	down	-0.44193	-5.72682	1.86316e-07	1.28106e-05	6.29255
TPTE2P3	-3.32617	3.32617	down	-6.5582	-5.72582	1.87092e-07	1.28488e-05	6.28847
MAP1B	1.99156	1.99156	up	-0.972868	5.72446	1.88144e-07	1.29059e-05	6.28298
PLEKHG4B	2.05462	2.05462	up	1.04586	5.72413	1.88405e-07	1.29087e-05	6.28162
GAD1	3.40559	3.40559	up	-3.97172	5.72249	1.89686e-07	1.29712e-05	6.27497
TRBV20-1	5.01269	5.01269	up	-4.26791	5.72211	1.89982e-07	1.29712e-05	6.27344
RP4-616B8.5	3.57267	3.57267	up	-6.47696	5.72131	1.90612e-07	1.29991e-05	6.27019
C2	1.66395	1.66395	up	5.83147	5.72041	1.91324e-07	1.30325e-05	6.26653
SH3RF2	2.64016	2.64016	up	-3.54449	5.71671	1.94269e-07	1.31871e-05	6.25155
SASH3	1.90717	1.90717	up	0.091681	5.71158	1.98437e-07	1.34079e-05	6.23073
TNFAIP2	1.65926	1.65926	up	2.43621	5.71032	1.99466e-07	1.3449e-05	6.22565
IL2RB	2.05627	2.05627	up	-1.00897	5.71	1.9973e-07	1.3449e-05	6.22436
HCLS1	1.66086	1.66086	up	2.01547	5.70908	2.00494e-07	1.34846e-05	6.22061
NDUFA4L2	1.55884	1.55884	up	3.46977	5.7086	2.00891e-07	1.34958e-05	6.21867
PCDHA13	-3.94315	3.94315	down	-5.66553	-5.70805	2.0135e-07	1.34958e-05	6.21643
LGALS17A	4.52339	4.52339	up	-5.56197	5.70456	2.04268e-07	1.36445e-05	6.20232
ARHGAP19-SLIT1	2.69678	2.69678	up	-8.54799	5.70353	2.05146e-07	1.36875e-05	6.19812
LCP2	1.68478	1.68478	up	0.655924	5.701	2.07296e-07	1.37839e-05	6.18789
OSR2	3.27282	3.27282	up	-4.25885	5.70057	2.07661e-07	1.37925e-05	6.18617
SLC15A3	1.63222	1.63222	up	4.86789	5.69662	2.11082e-07	1.3988e-05	6.17014
SCN11A	-2.44121	2.44121	down	-7.12612	-5.69453	2.12908e-07	1.40771e-05	6.16169
MSC	-2.77608	2.77608	down	4.13553	-5.69198	2.15156e-07	1.41778e-05	6.15139
RARRES2	2.13664	2.13664	up	5.79924	5.68652	2.20064e-07	1.43547e-05	6.12928
LCTL	2.50049	2.50049	up	-3.77509	5.68555	2.20939e-07	1.43809e-05	6.12538
IL4I1	1.56119	1.56119	up	-0.19932	5.68502	2.2143e-07	1.43969e-05	6.12321
GNGT2	1.86702	1.86702	up	-0.861652	5.68381	2.22535e-07	1.44527e-05	6.11832
KLHDC7B	2.53111	2.53111	up	-3.85961	5.68067	2.25437e-07	1.45681e-05	6.10562
SCN8A	-2.12994	2.12994	down	-3.08563	-5.68025	2.25828e-07	1.45681e-05	6.10392
ATP8B3	1.62423	1.62423	up	-0.0294203	5.6802	2.25869e-07	1.45681e-05	6.10374
MIMT1	-2.99744	2.99744	down	-7.18968	-5.67811	2.27827e-07	1.46311e-05	6.09528
RP11-10A14.5	-3.20933	3.20933	down	-1.85759	-5.67789	2.2803e-07	1.46311e-05	6.09441
LIF	2.26288	2.26288	up	-2.93406	5.6712	2.34409e-07	1.49098e-05	6.06735
TIFAB	3.40239	3.40239	up	-6.34367	5.67076	2.34829e-07	1.49203e-05	6.0656
ALDH1L1-AS2	-3.2709	3.2709	down	-3.37852	-5.67035	2.35226e-07	1.49268e-05	6.06394
GLIS3	2.36247	2.36247	up	-3.37165	5.67013	2.35441e-07	1.49268e-05	6.06305
CFAP43	-1.82878	1.82878	down	-3.00002	-5.66914	2.36407e-07	1.49718e-05	6.05903
ANKRD2	3.55039	3.55039	up	-6.44803	5.66612	2.39365e-07	1.51336e-05	6.04684
CHN2	1.78339	1.78339	up	-0.143492	5.66513	2.4034e-07	1.51718e-05	6.04285
MMP9	2.46256	2.46256	up	0.425044	5.66471	2.40762e-07	1.5182e-05	6.04113
CTD-2162K18.4	-3.05492	3.05492	down	-4.19295	-5.66147	2.43993e-07	1.53198e-05	6.02806
AC017104.6	1.73227	1.73227	up	0.90392	5.66103	2.44436e-07	1.53311e-05	6.02629
NPB	-3.16284	3.16284	down	-3.42091	-5.65955	2.45936e-07	1.54088e-05	6.02029
GCNT4	2.97199	2.97199	up	-6.04736	5.65687	2.48664e-07	1.5563e-05	6.00948
AC090945.1	-2.71004	2.71004	down	-4.20861	-5.65013	2.5566e-07	1.59413e-05	5.98227
PART1	3.14827	3.14827	up	-7.16672	5.64885	2.57005e-07	1.59996e-05	5.97713
MIR497HG	1.51353	1.51353	up	-0.994039	5.64053	2.65958e-07	1.65044e-05	5.94356
RP5-934G17.6	-2.76019	2.76019	down	-7.74179	-5.63821	2.68502e-07	1.66446e-05	5.93423
HTATIP2	1.85223	1.85223	up	3.01891	5.63745	2.6935e-07	1.66795e-05	5.93114
TUBA8	1.50902	1.50902	up	4.41906	5.63433	2.72822e-07	1.68588e-05	5.91859
ASIP	3.46539	3.46539	up	-1.8771	5.63323	2.74055e-07	1.68994e-05	5.91417
AC016582.2	-3.44218	3.44218	down	-6.7078	-5.632	2.75453e-07	1.69499e-05	5.90918
IDO1	4.26246	4.26246	up	-2.88913	5.6312	2.76356e-07	1.69876e-05	5.90597
DOCK11	1.82185	1.82185	up	0.0885266	5.62862	2.79296e-07	1.71437e-05	5.8956
CD5L	4.64162	4.64162	up	-5.98218	5.62837	2.79585e-07	1.71437e-05	5.89459
LCK	2.67552	2.67552	up	-1.54403	5.62768	2.80377e-07	1.71603e-05	5.89181
AC005019.3	-4.64292	4.64292	down	-5.8348	-5.62205	2.86941e-07	1.75097e-05	5.86913
TESPA1	3.27269	3.27269	up	-3.98091	5.61971	2.89718e-07	1.7624e-05	5.85969
LAMB3	2.10718	2.10718	up	-2.17468	5.61919	2.90336e-07	1.76251e-05	5.8576
LINC00421	3.67156	3.67156	up	-5.39726	5.61677	2.93238e-07	1.77461e-05	5.84786
CFAP74	2.7418	2.7418	up	-8.02133	5.60614	3.0631e-07	1.84419e-05	5.80512
SLC45A3	1.56503	1.56503	up	-1.91762	5.60363	3.09487e-07	1.85949e-05	5.79501
HLA-F	2.01906	2.01906	up	5.20535	5.60264	3.10748e-07	1.86232e-05	5.79102
MALL	1.83301	1.83301	up	0.350761	5.60251	3.10911e-07	1.86232e-05	5.79051
RASGRP2	1.50947	1.50947	up	-0.464662	5.60024	3.1382e-07	1.87783e-05	5.78138
AC145124.2	-1.51896	1.51896	down	-0.159148	-5.59944	3.1485e-07	1.88036e-05	5.77817
FHDC1	2.3634	2.3634	up	-0.475197	5.59941	3.14886e-07	1.88036e-05	5.77806
ITGB3	2.00642	2.00642	up	-3.09338	5.5908	3.26205e-07	1.94004e-05	5.74346
STAR	-1.74598	1.74598	down	-1.64658	-5.58848	3.29317e-07	1.95656e-05	5.73416
PTPRD	3.18579	3.18579	up	-5.32102	5.57872	3.42759e-07	2.0282e-05	5.69496
LILRB2	1.623	1.623	up	-0.297862	5.57815	3.43556e-07	2.02878e-05	5.69269
RP11-806O11.1	-4.0163	4.0163	down	-5.56319	-5.57808	3.43654e-07	2.02878e-05	5.69241
RP1-182O16.2	-3.07421	3.07421	down	-5.40196	-5.57767	3.44242e-07	2.02878e-05	5.69073
GRAP2	2.26945	2.26945	up	-2.59804	5.57192	3.52436e-07	2.06667e-05	5.66769
RLN2	-3.32596	3.32596	down	-3.47635	-5.57123	3.53439e-07	2.06871e-05	5.6649
NIPAL4	3.60827	3.60827	up	-6.8775	5.56285	3.65773e-07	2.13207e-05	5.6313
LL22NC03-104C7.1	-4.09748	4.09748	down	-3.95025	-5.56168	3.67523e-07	2.14014e-05	5.62663
CYP27C1	-1.87027	1.87027	down	-3.251	-5.56138	3.67979e-07	2.14067e-05	5.62541
PTGS1	1.74292	1.74292	up	0.0676266	5.55832	3.72607e-07	2.16116e-05	5.61317
SDK2	2.02679	2.02679	up	-1.72565	5.55758	3.73742e-07	2.16346e-05	5.61019
TIGIT	3.73816	3.73816	up	-3.91983	5.55413	3.79055e-07	2.19204e-05	5.59637
PXDN	1.86672	1.86672	up	0.905884	5.55112	3.83748e-07	2.217e-05	5.58432
SCN4B	1.55168	1.55168	up	-0.869477	5.54401	3.95057e-07	2.27336e-05	5.55587
SLC9A7	1.9655	1.9655	up	-3.71307	5.53995	4.01671e-07	2.30463e-05	5.53961
FCGR1A	1.9863	1.9863	up	1.25401	5.53812	4.0469e-07	2.31784e-05	5.53228
PAEP	4.26639	4.26639	up	-2.03644	5.53807	4.04764e-07	2.31784e-05	5.5321
CLDN10-AS1	-3.39358	3.39358	down	-7.62409	-5.53647	4.07414e-07	2.33074e-05	5.52571
MIRLET7BHG	2.09418	2.09418	up	-1.59742	5.5309	4.16791e-07	2.37741e-05	5.50343
SYT5	3.25393	3.25393	up	-2.60034	5.52554	4.26005e-07	2.42028e-05	5.48201
KLK13	-3.62724	3.62724	down	-1.12924	-5.52398	4.2873e-07	2.43131e-05	5.47577
RP11-348F1.3	-4.16791	4.16791	down	-5.98507	-5.52351	4.29549e-07	2.4336e-05	5.4739
KCNK2	-2.23825	2.23825	down	-0.0154684	-5.52182	4.32536e-07	2.44579e-05	5.46712
GAB3	1.5732	1.5732	up	-2.04313	5.52	4.35759e-07	2.4569e-05	5.45985
CECR1	1.92018	1.92018	up	2.64621	5.51368	4.4714e-07	2.509e-05	5.43461
HAP1	2.53995	2.53995	up	-3.67312	5.5118	4.5058e-07	2.52347e-05	5.4271
BATF	2.4636	2.4636	up	-1.20568	5.50649	4.60441e-07	2.56642e-05	5.40591
RP4-604G5.1	-3.31659	3.31659	down	-7.35077	-5.50377	4.6557e-07	2.58762e-05	5.39506
RP11-141M3.6	-2.30762	2.30762	down	-5.94198	-5.50184	4.69234e-07	2.60345e-05	5.38739
SLC38A8	3.32162	3.32162	up	-1.44844	5.50097	4.70913e-07	2.60522e-05	5.38389
S100A3	3.13481	3.13481	up	-3.11278	5.50094	4.70959e-07	2.60522e-05	5.3838
CD5	2.58379	2.58379	up	-2.83455	5.50053	4.71752e-07	2.60602e-05	5.38215
ACSBG1	3.17537	3.17537	up	-0.461675	5.50041	4.71993e-07	2.60602e-05	5.38165
RP11-598F7.5	2.58538	2.58538	up	-2.9501	5.49925	4.74216e-07	2.61582e-05	5.37705
FAM26F	2.53566	2.53566	up	0.320224	5.49882	4.75055e-07	2.61798e-05	5.37532
HS3ST3B1	2.50566	2.50566	up	-3.98227	5.49844	4.75792e-07	2.61958e-05	5.3738
EBI3	1.6197	1.6197	up	-0.274548	5.4961	4.80348e-07	2.63723e-05	5.36447
CD96	3.02592	3.02592	up	-3.62245	5.4901	4.92224e-07	2.69685e-05	5.34057
IKZF3	2.67318	2.67318	up	-3.68528	5.4871	4.98285e-07	2.72041e-05	5.32859
TNFRSF10C	2.23183	2.23183	up	-1.4365	5.48519	5.02156e-07	2.73899e-05	5.32101
NLRP6	2.12374	2.12374	up	-4.39413	5.47716	5.18849e-07	2.81955e-05	5.289
CASP5	3.61801	3.61801	up	-6.58296	5.47131	5.31328e-07	2.88011e-05	5.26575
LINC00645	-4.58148	4.58148	down	-5.45407	-5.46864	5.37126e-07	2.90808e-05	5.25512
RP11-281O15.4	-3.86922	3.86922	down	-4.5809	-5.46781	5.38947e-07	2.90987e-05	5.25181
LCP1	1.86666	1.86666	up	1.36735	5.46605	5.42818e-07	2.92807e-05	5.24481
NAP1L4P1	-3.1557	3.1557	down	-4.95973	-5.46227	5.51229e-07	2.95282e-05	5.22976
GABBR2	1.78038	1.78038	up	-3.42318	5.46217	5.5144e-07	2.95282e-05	5.22939
OLIG1	3.96404	3.96404	up	-2.97914	5.46171	5.52476e-07	2.95297e-05	5.22755
HLA-DPA1	1.72022	1.72022	up	5.47307	5.45936	5.57775e-07	2.97587e-05	5.21821
EPSTI1	2.14528	2.14528	up	-0.985468	5.45908	5.58403e-07	2.97651e-05	5.21711
CXCL10	3.29884	3.29884	up	-1.36986	5.45441	5.69107e-07	3.02805e-05	5.19853
GPR17	-2.82319	2.82319	down	-4.27822	-5.45338	5.71494e-07	3.03799e-05	5.19443
GFRA2	1.84817	1.84817	up	-1.94303	5.45276	5.72939e-07	3.04291e-05	5.19196
PKD2L1	3.30431	3.30431	up	-3.7481	5.44976	5.79963e-07	3.07743e-05	5.18004
FBXW12	-2.67129	2.67129	down	-5.84845	-5.44813	5.83809e-07	3.09503e-05	5.17357
TRABD2A	-1.9126	1.9126	down	0.271678	-5.4467	5.87198e-07	3.11019e-05	5.16791
AK5	2.50506	2.50506	up	-2.65261	5.44131	6.0019e-07	3.15617e-05	5.1465
CD52	2.13553	2.13553	up	1.85524	5.44006	6.03247e-07	3.1694e-05	5.14153
NXPH4	1.85969	1.85969	up	-0.731435	5.43853	6.06996e-07	3.18624e-05	5.13547
OMG	2.87142	2.87142	up	-0.297761	5.43683	6.11208e-07	3.19975e-05	5.1287
SFTA1P	3.43173	3.43173	up	-3.9449	5.43612	6.12973e-07	3.20538e-05	5.12588
ROR1	2.76733	2.76733	up	-4.89254	5.43595	6.13378e-07	3.20538e-05	5.12524
MSX1	1.54753	1.54753	up	-2.59675	5.43439	6.17272e-07	3.22285e-05	5.11904
RP1-239B22.5	1.92567	1.92567	up	-0.903819	5.43062	6.26774e-07	3.26664e-05	5.1041
NOVA1	1.89486	1.89486	up	-1.82666	5.42993	6.28553e-07	3.273e-05	5.10133
IFITM1	2.08368	2.08368	up	5.66326	5.42764	6.34397e-07	3.29757e-05	5.09227
GSTO2	-1.93259	1.93259	down	1.56547	-5.42495	6.41369e-07	3.3279e-05	5.08158
CPT1C	1.69064	1.69064	up	0.40723	5.42356	6.44973e-07	3.34364e-05	5.0761
SOCS2-AS1	2.05816	2.05816	up	-1.45536	5.41859	6.5811e-07	3.40572e-05	5.05638
ZBED2	3.59834	3.59834	up	-7.51199	5.41155	6.77123e-07	3.4887e-05	5.02852
SIT1	3.18455	3.18455	up	-2.43207	5.41004	6.81293e-07	3.5071e-05	5.02252
APLNR	1.76806	1.76806	up	-0.562752	5.40485	6.95738e-07	3.57418e-05	5.002
AP004782.1	-2.32619	2.32619	down	-4.83637	-5.40471	6.96154e-07	3.57418e-05	5.00141
SCIMP	1.63334	1.63334	up	-1.23975	5.40189	7.04138e-07	3.61201e-05	4.99026
PARVG	1.69877	1.69877	up	0.616624	5.39507	7.23826e-07	3.70327e-05	4.96329
HLA-DOA	1.99508	1.99508	up	0.27917	5.39444	7.25683e-07	3.70953e-05	4.96079
ZNF257	-3.02426	3.02426	down	-4.09909	-5.39318	7.29392e-07	3.72524e-05	4.9558
RP5-884G6.2	-2.02031	2.02031	down	-1.88634	-5.39273	7.3072e-07	3.72864e-05	4.95402
RP11-679B19.1	2.27132	2.27132	up	-4.42477	5.3871	7.47518e-07	3.79795e-05	4.9318
FAM196A	2.64787	2.64787	up	-6.83762	5.38585	7.51327e-07	3.80739e-05	4.92683
HLA-DRA	2.00359	2.00359	up	6.2572	5.38539	7.5271e-07	3.81111e-05	4.92503
TEKT3	-1.76286	1.76286	down	-0.118644	-5.38232	7.62101e-07	3.84536e-05	4.91291
TBC1D10C	2.30203	2.30203	up	-1.03284	5.37642	7.80498e-07	3.91794e-05	4.88959
NT5E	2.50781	2.50781	up	1.60257	5.37564	7.82954e-07	3.92354e-05	4.88651
EEF1A2	2.85476	2.85476	up	3.81737	5.36869	8.05226e-07	4.02308e-05	4.85909
PRKCDBP	1.93016	1.93016	up	3.68088	5.36848	8.05899e-07	4.02308e-05	4.85827
ADGRE1	2.3571	2.3571	up	-4.41722	5.36816	8.06962e-07	4.0232e-05	4.85699
PRRT4	-1.66543	1.66543	down	1.55009	-5.3675	8.09115e-07	4.03051e-05	4.85438
CNTN3	-3.68556	3.68556	down	-3.39135	-5.36513	8.16875e-07	4.06571e-05	4.84505
PATL2	1.87601	1.87601	up	-1.28573	5.36241	8.25884e-07	4.08624e-05	4.83433
PTGS2	2.2605	2.2605	up	-4.94129	5.36011	8.33587e-07	4.1174e-05	4.82525
FGF12	2.29106	2.29106	up	-2.00429	5.35393	8.54639e-07	4.21428e-05	4.80087
NFATC2	1.51472	1.51472	up	-1.84544	5.3533	8.56785e-07	4.2213e-05	4.79842
GJA1	1.57906	1.57906	up	2.24709	5.34291	8.93428e-07	4.37242e-05	4.75749
CH507-39O4.2	-3.11538	3.11538	down	-3.21534	-5.33927	9.06622e-07	4.42418e-05	4.74316
FAM43B	2.73187	2.73187	up	-3.50158	5.33916	9.07024e-07	4.42418e-05	4.74273
SLC16A8	1.73304	1.73304	up	0.833587	5.3387	9.08712e-07	4.42504e-05	4.74091
TNFSF14	2.65934	2.65934	up	-5.6482	5.33838	9.09873e-07	4.42702e-05	4.73966
CD247	2.27907	2.27907	up	-1.45128	5.33565	9.19955e-07	4.46865e-05	4.72889
ATP8A2	1.73399	1.73399	up	-4.10723	5.3338	9.26817e-07	4.48743e-05	4.72163
ITPR2	2.25926	2.25926	up	0.290161	5.33304	9.29663e-07	4.49345e-05	4.71864
SLC39A2	3.34074	3.34074	up	-5.96175	5.33216	9.32964e-07	4.50538e-05	4.71517
LINC01233	-3.2163	3.2163	down	-8.18522	-5.3297	9.42239e-07	4.53552e-05	4.7055
SLC8A1	2.15836	2.15836	up	-3.2217	5.32841	9.47161e-07	4.55324e-05	4.70041
SOX11	2.31306	2.31306	up	-7.77929	5.3283	9.47556e-07	4.55324e-05	4.70001
CTB-60B18.10	1.50928	1.50928	up	-0.615973	5.32812	9.48251e-07	4.55324e-05	4.69929
PAPSS2	1.55881	1.55881	up	-0.00984177	5.32463	9.61664e-07	4.60943e-05	4.68556
ZNF681	-2.39309	2.39309	down	-3.60494	-5.31405	1.00347e-06	4.78312e-05	4.64398
RP11-417E7.1	4.14779	4.14779	up	-5.83338	5.31153	1.01367e-06	4.82388e-05	4.6341
BCL11B	2.58328	2.58328	up	-4.76245	5.31125	1.01482e-06	4.82542e-05	4.633
RARRES3	2.11205	2.11205	up	3.84475	5.31092	1.01618e-06	4.82795e-05	4.63169
CCDC64	1.80415	1.80415	up	-0.134048	5.30922	1.02312e-06	4.85699e-05	4.62504
FCGR3B	3.39353	3.39353	up	-4.30102	5.30489	1.04107e-06	4.93819e-05	4.60805
CDKN1A	1.58903	1.58903	up	4.99233	5.30383	1.04552e-06	4.95502e-05	4.60387
ADGRB1	1.73711	1.73711	up	1.14249	5.30218	1.05246e-06	4.98014e-05	4.59742
LONRF3	2.69493	2.69493	up	-4.3633	5.29857	1.06784e-06	5.02107e-05	4.58324
TMEM178B	1.76709	1.76709	up	-3.32173	5.29726	1.07348e-06	5.04173e-05	4.5781
SPATA31A7	-3.59765	3.59765	down	-6.24064	-5.29601	1.07886e-06	5.06009e-05	4.57322
ZNF415	-2.41402	2.41402	down	-0.0670949	-5.29558	1.08074e-06	5.06486e-05	4.57151
HCN2	1.52428	1.52428	up	0.924729	5.28842	1.11224e-06	5.19172e-05	4.54345
ST8SIA1	2.73091	2.73091	up	-1.71619	5.28674	1.11974e-06	5.22256e-05	4.53688
APBB1IP	1.60147	1.60147	up	-0.726604	5.28608	1.12274e-06	5.23239e-05	4.53427
GSTA3	-2.99717	2.99717	down	1.96132	-5.28534	1.12605e-06	5.24363e-05	4.5314
BAG2	1.88596	1.88596	up	-0.433071	5.28191	1.14164e-06	5.30782e-05	4.51796
PTPRH	2.00558	2.00558	up	-0.188713	5.28088	1.14639e-06	5.32143e-05	4.51391
RP11-550I24.2	-3.15825	3.15825	down	-3.2549	-5.28017	1.14963e-06	5.33224e-05	4.51116
AMICA1	1.60879	1.60879	up	0.408322	5.27798	1.15978e-06	5.37508e-05	4.50257
AC104654.2	3.66629	3.66629	up	-5.76982	5.2749	1.17418e-06	5.4375e-05	4.49052
MYCNOS	3.73133	3.73133	up	-5.7751	5.27208	1.18755e-06	5.49074e-05	4.47946
S1PR4	2.32364	2.32364	up	-2.52503	5.27164	1.18961e-06	5.49593e-05	4.47777
ROPN1	-2.61718	2.61718	down	0.572256	-5.27127	1.19139e-06	5.49983e-05	4.47631
C8orf49	-2.97532	2.97532	down	-7.69899	-5.26806	1.20679e-06	5.5578e-05	4.46376
BIN2	1.82043	1.82043	up	-1.03474	5.26472	1.22306e-06	5.62386e-05	4.45069
FCGR3A	2.40919	2.40919	up	1.32929	5.25981	1.24735e-06	5.73105e-05	4.43149
SH2D1A	3.58736	3.58736	up	-4.93049	5.25786	1.25713e-06	5.76694e-05	4.42386
OR51E1	2.26791	2.26791	up	-4.92525	5.25442	1.27456e-06	5.84234e-05	4.41041
TUBB3	2.93057	2.93057	up	0.238994	5.252	1.28695e-06	5.88991e-05	4.40096
EGFLAM	1.76434	1.76434	up	-1.30613	5.25101	1.29207e-06	5.9087e-05	4.39709
REEP2	1.65411	1.65411	up	0.227323	5.24952	1.29976e-06	5.93414e-05	4.39129
MAMSTR	-1.62498	1.62498	down	0.548524	-5.24906	1.30218e-06	5.93642e-05	4.38948
GJA5	1.73968	1.73968	up	-1.77685	5.24847	1.30525e-06	5.9458e-05	4.38718
CD3D	3.1408	3.1408	up	-0.491229	5.24538	1.32148e-06	6.00106e-05	4.37511
MAFA	2.77885	2.77885	up	-5.49268	5.23719	1.36541e-06	6.16233e-05	4.34319
HP09025	2.52128	2.52128	up	-5.35982	5.23441	1.38067e-06	6.21205e-05	4.33234
TMEM178A	1.80279	1.80279	up	-1.15213	5.23404	1.38274e-06	6.21661e-05	4.33087
RP11-1149M10.2	3.38909	3.38909	up	-4.42239	5.23348	1.38585e-06	6.22256e-05	4.32869
FAM132B	1.82105	1.82105	up	1.22464	5.23304	1.38827e-06	6.22712e-05	4.32698
BDKRB2	1.82141	1.82141	up	-2.98546	5.23181	1.39508e-06	6.2529e-05	4.3222
TRBV5-6	3.70122	3.70122	up	-7.62113	5.22393	1.43972e-06	6.42345e-05	4.29146
SPATA31A1	-3.36275	3.36275	down	-5.35232	-5.21368	1.49978e-06	6.65595e-05	4.25157
RP11-64B16.2	1.69855	1.69855	up	-1.33884	5.21221	1.50862e-06	6.69014e-05	4.24583
SLC38A3	2.12483	2.12483	up	-0.926896	5.20832	1.53218e-06	6.78947e-05	4.23071
ZNF154	-1.52323	1.52323	down	-0.589367	-5.20575	1.54798e-06	6.84392e-05	4.2207
SLAMF6	2.67414	2.67414	up	-3.26042	5.20155	1.57409e-06	6.94667e-05	4.20437
ZP1	3.51745	3.51745	up	-5.8992	5.20133	1.57547e-06	6.94667e-05	4.20352
OLIG2	3.74907	3.74907	up	-6.68925	5.20028	1.58207e-06	6.95761e-05	4.19944
RP13-766D20.4	1.52567	1.52567	up	-2.13865	5.19744	1.60006e-06	7.02121e-05	4.18841
MMP2	2.03635	2.03635	up	3.7762	5.19695	1.60317e-06	7.0296e-05	4.18651
CCR5	2.33076	2.33076	up	-2.2157	5.19268	1.63072e-06	7.13435e-05	4.16989
SIGLEC1	1.50156	1.50156	up	0.365001	5.19169	1.63713e-06	7.15708e-05	4.16606
TSPYL5	1.5072	1.5072	up	2.57017	5.18952	1.65132e-06	7.20298e-05	4.15764
RP11-872D17.8	1.873	1.873	up	0.574742	5.18725	1.66634e-06	7.25007e-05	4.14881
PDE3A	-2.42399	2.42399	down	0.704404	-5.18465	1.68363e-06	7.31126e-05	4.13873
GAS6-AS1	2.89163	2.89163	up	-2.35772	5.18277	1.69629e-06	7.35531e-05	4.13143
CXCL13	4.33112	4.33112	up	-5.54779	5.17733	1.73337e-06	7.50498e-05	4.11033
S100A1	1.84779	1.84779	up	9.76018	5.17181	1.77182e-06	7.63198e-05	4.08893
CERKL	2.24702	2.24702	up	-2.88156	5.1695	1.78818e-06	7.68611e-05	4.07996
FBP2	-3.97704	3.97704	down	-3.52479	-5.1693	1.78963e-06	7.68611e-05	4.07917
CAMK2A	1.91902	1.91902	up	-1.69226	5.16803	1.79864e-06	7.71346e-05	4.07427
CES1P1	3.25975	3.25975	up	-4.93919	5.15615	1.88553e-06	8.0566e-05	4.02826
MRPL48P1	-3.1679	3.1679	down	-7.48529	-5.15564	1.8894e-06	8.06726e-05	4.02626
TBX20	2.74226	2.74226	up	-8.0469	5.15359	1.90484e-06	8.09777e-05	4.01832
PTPRCAP	2.60768	2.60768	up	0.212173	5.15304	1.90899e-06	8.09777e-05	4.0162
LINC00403	3.61549	3.61549	up	0.886223	5.15267	1.91175e-06	8.09777e-05	4.01479
ASCL2	1.58588	1.58588	up	-2.42522	5.14806	1.94709e-06	8.21777e-05	3.99692
ADAMTS14	2.46819	2.46819	up	-2.41176	5.14589	1.9639e-06	8.28274e-05	3.98854
CD53	1.65353	1.65353	up	1.8093	5.14232	1.99193e-06	8.37683e-05	3.97472
SMOC2	1.5302	1.5302	up	0.779611	5.14099	2.00245e-06	8.41394e-05	3.96959
RFTN2	-1.68775	1.68775	down	0.871247	-5.13929	2.016e-06	8.45396e-05	3.96301
IL11	2.46125	2.46125	up	-4.89648	5.13907	2.01775e-06	8.45396e-05	3.96216
RP11-554A11.7	-3.30428	3.30428	down	-5.61016	-5.13906	2.01781e-06	8.45396e-05	3.96213
PADI3	2.38519	2.38519	up	-8.09642	5.13892	2.01893e-06	8.45396e-05	3.96159
UBASH3A	3.09249	3.09249	up	-4.4869	5.1365	2.03835e-06	8.52311e-05	3.95225
DPEP1	3.03778	3.03778	up	-4.95443	5.13226	2.07294e-06	8.65539e-05	3.93585
RP11-446H18.5	-3.28105	3.28105	down	-6.40538	-5.13039	2.0883e-06	8.70089e-05	3.92865
TNFRSF4	1.74991	1.74991	up	-0.387587	5.12772	2.11056e-06	8.78116e-05	3.91831
TBX21	2.6485	2.6485	up	-4.18562	5.12676	2.11853e-06	8.79559e-05	3.91464
TOB2P1	-1.9008	1.9008	down	-1.99795	-5.12539	2.13005e-06	8.8309e-05	3.90935
RP11-215D10.1	3.02786	3.02786	up	-7.68818	5.12411	2.14088e-06	8.86323e-05	3.90441
JPH1	2.13848	2.13848	up	-1.03172	5.12326	2.1481e-06	8.88687e-05	3.90112
FRMD1	2.56112	2.56112	up	-6.63434	5.12246	2.15492e-06	8.90879e-05	3.89803
C1orf95	1.85153	1.85153	up	1.23205	5.12113	2.16635e-06	8.9497e-05	3.89288
CFB	1.67105	1.67105	up	1.04481	5.11964	2.17914e-06	8.99528e-05	3.88714
HYAL1	-1.58937	1.58937	down	-0.111761	-5.11936	2.18156e-06	8.99528e-05	3.88606
LTB	2.20391	2.20391	up	-0.47419	5.11931	2.18199e-06	8.99528e-05	3.88587
COL12A1	1.53198	1.53198	up	-1.37985	5.11908	2.18396e-06	8.99648e-05	3.88498
APOL6	1.86993	1.86993	up	0.392965	5.1096	2.26738e-06	9.32109e-05	3.84844
CPNE5	1.91592	1.91592	up	-0.642044	5.10541	2.30525e-06	9.45022e-05	3.8323
SLC38A5	3.18535	3.18535	up	2.45257	5.10427	2.31573e-06	9.48657e-05	3.82787
SDS	2.26033	2.26033	up	-0.503053	5.10384	2.31962e-06	9.49586e-05	3.82624
HTR1A	-2.83614	2.83614	down	-7.63878	-5.10229	2.33386e-06	9.54747e-05	3.82027
ZNF197-AS1	-3.31847	3.31847	down	-6.29077	-5.10148	2.34139e-06	9.55824e-05	3.81714
COL22A1	2.2519	2.2519	up	0.0737342	5.10129	2.34312e-06	9.55867e-05	3.81641
CCDC184	2.0781	2.0781	up	-3.4984	5.10026	2.35271e-06	9.58744e-05	3.81243
CYTIP	2.02133	2.02133	up	-2.38219	5.09842	2.36981e-06	9.63256e-05	3.80537
LINC00862	3.17412	3.17412	up	-5.88676	5.098	2.37375e-06	9.63256e-05	3.80376
LRRN3	2.46004	2.46004	up	-3.70549	5.09311	2.42011e-06	9.78417e-05	3.7849
JAKMIP1	3.19981	3.19981	up	-4.19196	5.09089	2.44141e-06	9.84243e-05	3.77637
VWC2	2.94173	2.94173	up	-7.61674	5.09029	2.44719e-06	9.85282e-05	3.77406
XXbac-BPG248L24.12	2.57982	2.57982	up	-0.586653	5.08956	2.45427e-06	9.87457e-05	3.77124
VN1R85P	-3.84594	3.84594	down	-6.69597	-5.08769	2.47239e-06	9.93381e-05	3.76408
APOL4	1.87488	1.87488	up	-1.95081	5.08721	2.47707e-06	9.93898e-05	3.76224
VN1R20P	-2.91618	2.91618	down	-6.81326	-5.08663	2.48275e-06	9.95498e-05	3.76
DDX25	-1.74973	1.74973	down	-0.549214	-5.08556	2.49326e-06	9.98344e-05	3.75589
LAYN	1.61281	1.61281	up	-0.63468	5.08256	2.52299e-06	0.000100818	3.74433
ASS1	1.65331	1.65331	up	4.23116	5.08166	2.53195e-06	0.000101107	3.74088
MDGA1	1.88367	1.88367	up	0.159865	5.07586	2.59053e-06	0.000103095	3.71859
GATA5	2.22179	2.22179	up	-6.38902	5.07456	2.60383e-06	0.000103414	3.7136
CRABP2	1.65336	1.65336	up	0.661435	5.07044	2.64649e-06	0.000104824	3.69777
LINC01354	-2.55121	2.55121	down	-6.17369	-5.06974	2.65373e-06	0.000105039	3.69511
HLA-DQA1	2.20281	2.20281	up	3.08821	5.06803	2.67169e-06	0.000105573	3.68854
GRM8	2.09733	2.09733	up	-2.87524	5.06758	2.67648e-06	0.000105573	3.68679
IZUMO2	-3.21601	3.21601	down	-7.3294	-5.06743	2.67803e-06	0.000105573	3.68623
RP11-79N23.1	-3.4115	3.4115	down	-6.22397	-5.06663	2.68649e-06	0.000105836	3.68315
BEX5	-1.8544	1.8544	down	1.0317	-5.06373	2.7174e-06	0.000106705	3.67201
ZSCAN12P1	-1.9489	1.9489	down	-1.23664	-5.06363	2.71838e-06	0.000106705	3.67166
MFSD2A	1.64799	1.64799	up	-1.98192	5.06065	2.75055e-06	0.000107779	3.6602
CTD-2015G9.2	2.15895	2.15895	up	-7.83885	5.06032	2.75404e-06	0.000107844	3.65896
CCDC109B	1.72605	1.72605	up	0.872447	5.05824	2.77676e-06	0.000108661	3.65096
PALM3	2.89623	2.89623	up	-5.38455	5.05775	2.78214e-06	0.000108749	3.64907
AMIGO2	2.07257	2.07257	up	-2.70538	5.05636	2.79731e-06	0.000109246	3.64377
RP6-109B7.4	2.85637	2.85637	up	-4.06029	5.05511	2.81112e-06	0.000109566	3.63898
RP11-548H18.2	-1.73088	1.73088	down	-4.51945	-5.05121	2.85461e-06	0.000110966	3.62403
STK32B	1.51582	1.51582	up	-1.48769	5.04964	2.87232e-06	0.000111433	3.618
IFNG	3.54967	3.54967	up	-6.80755	5.04705	2.90178e-06	0.000112204	3.60806
EGR3	2.04485	2.04485	up	-2.23851	5.04029	2.97991e-06	0.000114909	3.58218
ZNF663P	-3.03472	3.03472	down	-5.51663	-5.03471	3.04597e-06	0.000117315	3.56083
HOXB4	2.81249	2.81249	up	-6.91063	5.03013	3.10123e-06	0.00011919	3.54332
ARHGDIG	2.06691	2.06691	up	1.18909	5.03	3.1028e-06	0.00011919	3.54283
IRF8	1.75542	1.75542	up	-0.429038	5.02721	3.13701e-06	0.00012011	3.53215
LRRK2	-1.7836	1.7836	down	-1.18369	-5.02622	3.14925e-06	0.000120422	3.52836
ADAMTS12	1.73786	1.73786	up	-3.91614	5.02458	3.1696e-06	0.000120885	3.52208
PHF24	-1.76007	1.76007	down	-0.0778608	-5.02289	3.19065e-06	0.00012145	3.51564
C2CD4B	2.44784	2.44784	up	-5.89332	5.02161	3.20676e-06	0.000121847	3.51074
RP1-266L20.2	-1.86625	1.86625	down	-1.06716	-5.01255	3.32275e-06	0.000125824	3.47614
ATP1B2	1.53497	1.53497	up	2.90442	5.0109	3.34431e-06	0.000126477	3.46984
ZSCAN12	-1.50687	1.50687	down	-0.481014	-5.00949	3.36279e-06	0.00012693	3.46448
RP11-16P20.4	-2.05706	2.05706	down	-5.40245	-5.0062	3.40649e-06	0.000128259	3.45191
CTD-2529O21.1	2.19686	2.19686	up	-2.24017	5.00529	3.41858e-06	0.000128539	3.44846
RP1-131F15.2	-2.30815	2.30815	down	-7.77608	-5.00374	3.43943e-06	0.000129157	3.44254
ERN2	2.71198	2.71198	up	-7.31963	5.00349	3.44285e-06	0.000129203	3.44157
RP11-142G1.3	-3.00206	3.00206	down	-7.93548	-5.00268	3.45377e-06	0.000129509	3.43849
FAM105A	1.82574	1.82574	up	-1.10089	5.0014	3.47116e-06	0.000129849	3.4336
LOXL4	1.85719	1.85719	up	2.59907	5.00001	3.4901e-06	0.000130225	3.42831
C1orf167	2.48632	2.48632	up	-1.11397	4.99841	3.51198e-06	0.000130958	3.42222
AGPAT4	1.83349	1.83349	up	-1.31316	4.99794	3.51847e-06	0.000131117	3.42042
RP11-266J6.2	-2.98693	2.98693	down	-2.10364	-4.99589	3.54689e-06	0.000131924	3.41259
IL10RA	1.61517	1.61517	up	0.383667	4.99246	3.59481e-06	0.000133452	3.39953
NCKAP1L	1.54254	1.54254	up	0.101357	4.99199	3.60142e-06	0.000133613	3.39774
FGD5P1	-2.8356	2.8356	down	-6.15462	-4.9867	3.67673e-06	0.000135976	3.3776
ABCB4	2.2258	2.2258	up	-0.868378	4.9854	3.69543e-06	0.000136582	3.37266
AC008088.4	1.64947	1.64947	up	-0.973999	4.98416	3.7135e-06	0.000136907	3.36791
KIF17	2.62141	2.62141	up	1.91975	4.97461	3.85473e-06	0.000141665	3.33159
LOC401913	-3.20706	3.20706	down	-7.32171	-4.96973	3.92896e-06	0.000144122	3.31303
WDR87	-2.28486	2.28486	down	-8.01229	-4.96931	3.93536e-06	0.000144139	3.31145
RP11-12M5.3	3.98617	3.98617	up	-6.2666	4.96929	3.93571e-06	0.000144139	3.31136
SLC25A21	-3.45163	3.45163	down	-3.6341	-4.96593	3.9876e-06	0.000145816	3.29861
SP140	1.73852	1.73852	up	-2.16791	4.96532	3.99719e-06	0.000146076	3.29628
HCG16	-3.50139	3.50139	down	-2.66522	-4.9642	4.0146e-06	0.000146529	3.29205
PLAC8	2.78554	2.78554	up	-2.68558	4.9591	4.09547e-06	0.000149202	3.27264
CTD-2561J22.5	-3.41692	3.41692	down	-5.5985	-4.95484	4.16409e-06	0.000151419	3.25648
MPEG1	1.50494	1.50494	up	1.31224	4.94719	4.29007e-06	0.00015523	3.22748
RP11-485G7.5	-3.4359	3.4359	down	-5.19888	-4.94688	4.29537e-06	0.000155325	3.22628
HOXA1	2.77253	2.77253	up	-7.22529	4.94605	4.30916e-06	0.000155632	3.22316
CCL3	1.98441	1.98441	up	0.505595	4.94586	4.31237e-06	0.000155652	3.22244
SSPO	1.70183	1.70183	up	-3.17172	4.944	4.34386e-06	0.000156596	3.21536
AQP1	1.5769	1.5769	up	1.65171	4.94365	4.34972e-06	0.00015671	3.21405
TRBV29-1	4.45328	4.45328	up	-5.71126	4.94078	4.39858e-06	0.000158082	3.20319
SLIT3	1.61557	1.61557	up	-1.77383	4.9403	4.40683e-06	0.000158281	3.20136
HLA-DQB1	2.44267	2.44267	up	3.52598	4.93924	4.42513e-06	0.000158841	3.19733
RSAD2	2.16008	2.16008	up	-1.72685	4.93804	4.44582e-06	0.000159486	3.1928
TRGC2	3.4206	3.4206	up	-3.10323	4.93346	4.52579e-06	0.000161506	3.17546
AGGF1P3	-2.82851	2.82851	down	-7.8084	-4.93328	4.52908e-06	0.000161506	3.17475
LINC01271	2.99648	2.99648	up	-5.39451	4.93327	4.52916e-06	0.000161506	3.17473
CCKBR	2.74678	2.74678	up	-7.21598	4.9269	4.64277e-06	0.000164641	3.15064
SLC27A2	2.36844	2.36844	up	-3.59932	4.92666	4.64724e-06	0.000164695	3.1497
FGL1	-2.54968	2.54968	down	-7.78967	-4.92282	4.71719e-06	0.000167072	3.13517
FGD2	1.59188	1.59188	up	-0.749609	4.92117	4.74742e-06	0.00016794	3.12896
MEGF11	3.01	3.01	up	-3.9707	4.9207	4.75623e-06	0.00016815	3.12716
SELL	1.99437	1.99437	up	-1.24726	4.91927	4.78263e-06	0.000168778	3.12178
RP11-473C18.3	2.42121	2.42121	up	-8.77052	4.91827	4.80128e-06	0.000169334	3.11799
AC008060.7	2.94261	2.94261	up	-7.12136	4.91703	4.82461e-06	0.000169967	3.11328
RP11-404P21.8	2.97329	2.97329	up	-8.15621	4.91579	4.84783e-06	0.000170565	3.10861
SIGLEC7	1.53987	1.53987	up	-1.3264	4.91484	4.86584e-06	0.000170993	3.105
C4orf19	-3.00224	3.00224	down	-2.50531	-4.91257	4.90891e-06	0.000172197	3.09644
SIGLEC12	2.90239	2.90239	up	-4.21282	4.91063	4.94593e-06	0.000172978	3.08913
TRAV14DV4	3.94238	3.94238	up	-6.97316	4.90988	4.96054e-06	0.000173385	3.08626
TRAV4	3.87312	3.87312	up	-7.49743	4.9085	4.98718e-06	0.000174043	3.08105
NCKAP5	-1.7679	1.7679	down	-0.922735	-4.90259	5.10299e-06	0.000177412	3.05874
GBP5	2.71765	2.71765	up	-1.78985	4.9012	5.13052e-06	0.000178052	3.0535
C16orf45	1.56398	1.56398	up	1.98172	4.89634	5.22818e-06	0.000181012	3.03517
RP11-552E4.3	3.53866	3.53866	up	-6.22456	4.89404	5.27514e-06	0.000182422	3.02648
SOX15	-1.58856	1.58856	down	0.782227	-4.89117	5.33413e-06	0.000184027	3.01567
CXCL9	3.00943	3.00943	up	-1.74614	4.8902	5.35427e-06	0.000184614	3.01201
GZMH	2.36762	2.36762	up	-1.00976	4.88675	5.42626e-06	0.000186876	2.99903
C1orf116	2.40712	2.40712	up	-0.0824013	4.88509	5.4613e-06	0.000187972	2.99277
NKX6-1	2.86746	2.86746	up	-6.41683	4.88304	5.50479e-06	0.000189358	2.98506
BCL11A	-2.00144	2.00144	down	-0.243761	-4.88223	5.52207e-06	0.000189841	2.98202
ACOT12	-3.20209	3.20209	down	-4.78364	-4.88141	5.53967e-06	0.000190111	2.97892
AC083884.8	3.39847	3.39847	up	-4.7422	4.87732	5.62824e-06	0.000192925	2.96351
TDRD10	-1.84463	1.84463	down	-1.00606	-4.87551	5.66777e-06	0.000193746	2.95671
CTD-3035D6.1	-2.96238	2.96238	down	-3.64214	-4.87548	5.66849e-06	0.000193746	2.95658
RNF125	1.70433	1.70433	up	-1.96272	4.87547	5.66876e-06	0.000193746	2.95654
NEXN	1.61504	1.61504	up	-2.44072	4.87512	5.67634e-06	0.000193893	2.95524
HSPB8	2.44545	2.44545	up	2.51591	4.87486	5.68216e-06	0.000193978	2.95424
NTF3	3.46647	3.46647	up	-4.9246	4.87233	5.738e-06	0.000195656	2.94474
RP11-304L19.3	2.35863	2.35863	up	-1.17686	4.86637	5.87198e-06	0.000199566	2.92231
SCCPDH	1.68106	1.68106	up	1.87485	4.86223	5.96657e-06	0.000202039	2.90678
LINC01010	3.07563	3.07563	up	-7.15939	4.85986	6.02161e-06	0.00020359	2.89786
AL022344.7	-3.04443	3.04443	down	-7.08867	-4.85914	6.03841e-06	0.000204	2.89515
UNQ6494	3.08161	3.08161	up	-7.38452	4.85705	6.08726e-06	0.000205532	2.88733
CHRNB2	-1.71459	1.71459	down	-1.35376	-4.85529	6.12904e-06	0.000206704	2.88068
KCNK1	2.68435	2.68435	up	-1.55091	4.85508	6.13395e-06	0.000206751	2.8799
ZNF676	-3.11434	3.11434	down	-5.46878	-4.85443	6.14942e-06	0.000207153	2.87745
RUNX1T1	1.87999	1.87999	up	-2.66684	4.85265	6.19186e-06	0.000208343	2.87077
ZAP70	2.42312	2.42312	up	-1.84838	4.85017	6.25146e-06	0.000209704	2.86147
RPS6KA2	1.56245	1.56245	up	1.72363	4.85012	6.25255e-06	0.000209704	2.8613
RP11-276H19.2	-2.2433	2.2433	down	-8.5016	-4.85007	6.25377e-06	0.000209704	2.86111
CASP1	1.60579	1.60579	up	1.85483	4.84873	6.28632e-06	0.000210204	2.85606
COL11A1	-2.20808	2.20808	down	0.717138	-4.8486	6.28948e-06	0.000210204	2.85558
RP11-242J7.1	2.54432	2.54432	up	-8.70974	4.8485	6.29184e-06	0.000210204	2.85521
LGALS3	1.69417	1.69417	up	6.0662	4.84754	6.31517e-06	0.000210797	2.85162
FASLG	3.30374	3.30374	up	-4.7034	4.84449	6.38998e-06	0.000212326	2.84018
LILRA5	1.58243	1.58243	up	-1.9188	4.84325	6.42065e-06	0.000213104	2.83552
CCDC177	2.03734	2.03734	up	-4.70642	4.84294	6.42845e-06	0.000213193	2.83435
ADRA2A	1.7114	1.7114	up	-0.0340544	4.84285	6.43063e-06	0.000213193	2.83402
RP11-803B1.8	-2.76484	2.76484	down	-3.73052	-4.84059	6.48685e-06	0.000214809	2.82556
HS3ST3A1	2.58261	2.58261	up	-4.59399	4.83891	6.52919e-06	0.000215972	2.81924
NTRK1	1.94399	1.94399	up	-3.6449	4.83611	6.60009e-06	0.000218194	2.80875
RTP5	2.53898	2.53898	up	-8.27996	4.83056	6.74283e-06	0.000222286	2.78797
SULT1A1	1.87056	1.87056	up	4.2835	4.83012	6.75439e-06	0.000222468	2.78631
ESR2	1.89489	1.89489	up	-3.18969	4.82878	6.78915e-06	0.00022331	2.78132
RP11-181B11.2	-2.50919	2.50919	down	-2.05272	-4.82801	6.80941e-06	0.000223851	2.77843
PCDHA11	-3.22815	3.22815	down	-4.98634	-4.82705	6.83463e-06	0.000224428	2.77484
FCGR1B	1.75816	1.75816	up	-1.08975	4.82636	6.85298e-06	0.000224851	2.77223
NTRK3	1.79445	1.79445	up	-2.6407	4.82627	6.85519e-06	0.000224851	2.77192
CLEC12A	3.15419	3.15419	up	-4.74069	4.82071	7.00364e-06	0.000228951	2.75111
RP4-710M3.2	-4.35042	4.35042	down	-6.05262	-4.82056	7.00777e-06	0.000228958	2.75054
TMEM163	1.74539	1.74539	up	-3.086	4.82	7.02284e-06	0.000229195	2.74846
SPOCD1	2.53065	2.53065	up	-2.44692	4.81652	7.11765e-06	0.000231515	2.73543
XCR1	2.84601	2.84601	up	-6.51756	4.80946	7.31362e-06	0.000236837	2.70906
PRLR	2.44411	2.44411	up	-5.22185	4.80905	7.32538e-06	0.000237087	2.7075
PTGER4	3.08128	3.08128	up	0.306439	4.80772	7.36276e-06	0.000238034	2.70256
ZNF831	2.63091	2.63091	up	-7.15529	4.80582	7.41696e-06	0.000238995	2.69544
LINC00404	3.88407	3.88407	up	-2.26711	4.80421	7.46296e-06	0.000240213	2.68944
MOXD1	2.06755	2.06755	up	-1.99137	4.80003	7.58393e-06	0.000243305	2.67383
LPPR4	2.37295	2.37295	up	-4.35821	4.79978	7.59098e-06	0.000243398	2.67292
AF186192.6	-3.26272	3.26272	down	-4.76254	-4.79937	7.60297e-06	0.000243602	2.67139
CCNO	2.45999	2.45999	up	0.596972	4.79442	7.74911e-06	0.00024752	2.65291
IGFN1	1.98945	1.98945	up	-8.63772	4.79422	7.75519e-06	0.000247579	2.65215
TRBV4-1	4.03389	4.03389	up	-6.11277	4.79323	7.78445e-06	0.000248377	2.64849
CALY	3.38642	3.38642	up	-4.74055	4.79169	7.83072e-06	0.000249446	2.64274
GUCY1B3	1.5093	1.5093	up	-1.39477	4.79139	7.83978e-06	0.000249599	2.64162
GIPC3	-1.50124	1.50124	down	1.58912	-4.78978	7.88844e-06	0.000250759	2.63561
2021-03-11	2.87782	2.87782	up	-8.0666	4.78962	7.89333e-06	0.000250759	2.63501
GBP2	2.23344	2.23344	up	1.72439	4.78891	7.91474e-06	0.000250972	2.63238
CCDC68	-2.02998	2.02998	down	-1.82783	-4.78826	7.93465e-06	0.00025139	2.62994
KCNF1	1.66984	1.66984	up	-2.16481	4.78666	7.98336e-06	0.000252796	2.624
ZNF285	-1.61829	1.61829	down	-0.415037	-4.78447	8.05096e-06	0.000254524	2.61582
CH507-236L23.3	-1.62141	1.62141	down	-5.00781	-4.784	8.06549e-06	0.000254571	2.61407
CH507-338C24.3	-1.62141	1.62141	down	-5.00781	-4.784	8.06549e-06	0.000254571	2.61407
CH507-39O4.3	-1.62141	1.62141	down	-5.00781	-4.784	8.06549e-06	0.000254571	2.61407
NOV	1.66798	1.66798	up	0.50863	4.78328	8.08774e-06	0.000254999	2.6114
RP11-573D15.1	-3.77983	3.77983	down	-6.02773	-4.78054	8.17335e-06	0.00025725	2.60118
RP11-709A23.2	2.49221	2.49221	up	-8.392	4.77797	8.25427e-06	0.000259551	2.59162
HLA-DMB	1.57088	1.57088	up	2.91168	4.7773	8.27561e-06	0.000260082	2.58911
TNFRSF18	2.23015	2.23015	up	-2.56125	4.77523	8.34145e-06	0.000262011	2.58142
IGSF21	1.94985	1.94985	up	-1.43824	4.77437	8.36911e-06	0.000262598	2.57821
MEGF10	-2.88833	2.88833	down	-2.104	-4.77097	8.47893e-06	0.000265334	2.56556
EFCAB12	-2.10226	2.10226	down	-3.89135	-4.76872	8.55225e-06	0.0002672	2.5572
TAS1R1	-2.84142	2.84142	down	-4.99872	-4.76785	8.58087e-06	0.000267808	2.55396
RP11-433J20.1	-2.33642	2.33642	down	-5.92603	-4.76731	8.59855e-06	0.000268217	2.55196
RP3-388M5.9	-1.91437	1.91437	down	-2.95386	-4.76643	8.62758e-06	0.000268979	2.54869
RP11-124N2.1	-3.81544	3.81544	down	-3.31948	-4.76217	8.76958e-06	0.000272872	2.53285
RP11-944L7.4	-3.33001	3.33001	down	-5.07941	-4.7618	8.78198e-06	0.000272998	2.53148
CMPK2	1.71204	1.71204	up	-0.6505	4.76173	8.78444e-06	0.000272998	2.53121
MPPED2	-2.27198	2.27198	down	-0.2332	-4.76021	8.83569e-06	0.0002743	2.52557
CTLA4	3.25428	3.25428	up	-6.47634	4.75377	9.05625e-06	0.000280404	2.50165
PPAPDC1A	2.81656	2.81656	up	-4.6653	4.75363	9.06107e-06	0.000280405	2.50113
DLX5	1.77766	1.77766	up	-3.10037	4.75225	9.10899e-06	0.000281442	2.49601
EOMES	2.64401	2.64401	up	-1.78909	4.75128	9.14264e-06	0.000282146	2.49243
SPAG1	1.5879	1.5879	up	-1.70074	4.75104	9.1513e-06	0.000282154	2.49152
RP5-1171I10.5	2.67117	2.67117	up	-3.67832	4.74958	9.20247e-06	0.000283433	2.48611
KIR2DL4	2.87881	2.87881	up	-5.62548	4.74909	9.21956e-06	0.000283661	2.48431
MLC1	2.77697	2.77697	up	-3.77207	4.74856	9.23835e-06	0.00028409	2.48233
AC005609.17	-3.40063	3.40063	down	-7.66338	-4.74678	9.30155e-06	0.000285136	2.47572
PCDHA10	-3.13095	3.13095	down	-5.15596	-4.74634	9.3171e-06	0.000285314	2.4741
TMPRSS6	1.82953	1.82953	up	-8.71667	4.74612	9.32518e-06	0.000285412	2.47326
SLITRK2	2.39222	2.39222	up	-2.09125	4.74459	9.37965e-06	0.000286779	2.46761
LINC01314	1.85677	1.85677	up	-1.61898	4.74429	9.39051e-06	0.000286962	2.46649
RP1-29C18.9	2.93753	2.93753	up	-6.24874	4.7433	9.42604e-06	0.000287581	2.46282
TRAV24	3.14389	3.14389	up	-8.25106	4.74318	9.43042e-06	0.000287581	2.46237
GBP4	1.91092	1.91092	up	0.325918	4.74293	9.43941e-06	0.000287705	2.46145
ITIH6	2.9885	2.9885	up	-3.65016	4.74133	9.49736e-06	0.000289278	2.45551
MMP25	1.79206	1.79206	up	-2.99924	4.74123	9.50089e-06	0.000289278	2.45515
WBSCR17	2.59436	2.59436	up	-3.79903	4.74068	9.52112e-06	0.000289443	2.45309
OPRD1	2.18365	2.18365	up	-7.17627	4.73981	9.55252e-06	0.000290247	2.44989
CCL18	3.302	3.302	up	0.643366	4.7389	9.58611e-06	0.000291117	2.44649
CD38	1.93963	1.93963	up	-1.74765	4.73808	9.61592e-06	0.000291719	2.44348
MAST4-AS1	-2.99848	2.99848	down	-5.77532	-4.73659	9.67084e-06	0.000292628	2.43795
RP11-903H12.5	-2.67026	2.67026	down	-0.468233	-4.73646	9.67586e-06	0.000292628	2.43745
FOXD1-AS1	3.80745	3.80745	up	-3.16688	4.73224	9.83285e-06	0.000296764	2.42184
RP11-235C23.5	-2.90719	2.90719	down	-5.17498	-4.72295	1.01878e-05	0.000306372	2.38745
PACSIN1	1.85555	1.85555	up	-1.76609	4.72177	1.02339e-05	0.000307285	2.38307
GPR63	2.3526	2.3526	up	-5.56219	4.72036	1.02891e-05	0.000308783	2.37786
RP5-875H18.9	3.4626	3.4626	up	-5.11269	4.71904	1.03407e-05	0.000309921	2.373
LINC00528	2.29331	2.29331	up	-5.59758	4.71325	1.05718e-05	0.000315974	2.35158
SPOCK1	1.54602	1.54602	up	-0.273462	4.71057	1.06803e-05	0.00031889	2.34168
PCDHA3	-3.1802	3.1802	down	-6.55842	-4.70746	1.08074e-05	0.000322086	2.33021
BMPR1B	3.0485	3.0485	up	-2.3633	4.70732	1.08132e-05	0.000322086	2.32969
LINC01252	2.32079	2.32079	up	-3.45444	4.70212	1.10295e-05	0.000327978	2.31049
KIR2DL3	2.56509	2.56509	up	-7.40716	4.70186	1.10402e-05	0.00032813	2.30955
RP11-431N15.2	-3.09347	3.09347	down	-4.40057	-4.70136	1.10615e-05	0.00032843	2.30768
LINC00239	2.94319	2.94319	up	-7.56263	4.70015	1.11126e-05	0.000329614	2.30321
TACR1	2.33177	2.33177	up	-6.99415	4.69878	1.11708e-05	0.000331004	2.29815
COBL	2.13992	2.13992	up	-0.321153	4.6973	1.12336e-05	0.000332697	2.29272
MIR155HG	2.75744	2.75744	up	-3.71805	4.69608	1.12858e-05	0.000334053	2.28822
TFCP2L1	1.54898	1.54898	up	-2.69057	4.69597	1.12908e-05	0.000334053	2.2878
RP11-419C23.1	-3.42672	3.42672	down	-5.98799	-4.69188	1.14677e-05	0.000338261	2.27273
CORO6	2.09213	2.09213	up	-0.943137	4.69169	1.14758e-05	0.000338332	2.27204
RP11-687M24.8	-1.98109	1.98109	down	1.19852	-4.69154	1.14824e-05	0.000338357	2.27148
LINC01044	2.928	2.928	up	-7.63441	4.6909	1.15105e-05	0.000338791	2.26912
MYO7B	-2.51978	2.51978	down	-0.754666	-4.69086	1.15124e-05	0.000338791	2.26895
LURAP1	-1.67301	1.67301	down	1.09289	-4.6882	1.16292e-05	0.000341649	2.25917
CTA-212A2.1	2.29934	2.29934	up	-5.02891	4.68776	1.16485e-05	0.000341873	2.25757
CES1	2.90265	2.90265	up	1.53413	4.68645	1.17069e-05	0.000343417	2.25272
SIGLEC8	2.47157	2.47157	up	-1.90255	4.68271	1.18745e-05	0.000347811	2.23894
GZMM	1.61821	1.61821	up	-1.13897	4.68139	1.19343e-05	0.000349212	2.23408
RP11-307C18.1	2.3233	2.3233	up	-1.59032	4.67886	1.20492e-05	0.000351398	2.22479
FAM196B	-2.74149	2.74149	down	-6.8309	-4.67616	1.21733e-05	0.000354436	2.21486
FXYD2	3.00574	3.00574	up	-2.74944	4.67536	1.22104e-05	0.000355226	2.21191
KATNAL2	1.53032	1.53032	up	0.386406	4.6731	1.23155e-05	0.000357509	2.20361
ICOS	2.97102	2.97102	up	-6.52268	4.67011	1.24563e-05	0.000360883	2.19259
SAMSN1	2.27768	2.27768	up	-2.18111	4.66957	1.24815e-05	0.000361434	2.19063
LINC00158	2.73588	2.73588	up	-7.88534	4.66906	1.25059e-05	0.000361961	2.18874
RP11-57H12.3	-3.20602	3.20602	down	-4.28288	-4.66772	1.25695e-05	0.000363621	2.18383
RP11-392A14.8	-2.29108	2.29108	down	-6.18218	-4.66584	1.26596e-05	0.000365199	2.1769
CLEC4G	2.27027	2.27027	up	-4.03015	4.66039	1.2924e-05	0.000371857	2.15688
ZNF860	-1.75142	1.75142	down	-3.41252	-4.65944	1.29706e-05	0.000372832	2.15339
RP11-281O15.8	-3.17545	3.17545	down	-6.92805	-4.65435	1.32231e-05	0.000378788	2.13472
RASGRP1	2.57505	2.57505	up	-3.78515	4.6542	1.32304e-05	0.000378812	2.13418
PTHLH	2.77712	2.77712	up	-3.44031	4.65385	1.32481e-05	0.000378949	2.13289
APOBEC2	-2.95901	2.95901	down	-4.76373	-4.65331	1.32752e-05	0.000379539	2.13091
RP3-439F8.1	2.24421	2.24421	up	-3.79654	4.65197	1.3343e-05	0.000380919	2.12597
SLA	1.61569	1.61569	up	-0.690644	4.65115	1.33844e-05	0.000381799	2.12298
ENDOU	-1.69711	1.69711	down	-3.9426	-4.65107	1.33885e-05	0.000381799	2.12268
OR4F13P	2.14022	2.14022	up	-8.79943	4.65094	1.33948e-05	0.000381799	2.12222
RP11-15A1.2	-3.27587	3.27587	down	-6.30457	-4.6489	1.3499e-05	0.000384062	2.11472
CHL1-AS1	-2.60582	2.60582	down	-8.13427	-4.64441	1.37301e-05	0.000389692	2.09827
PPP1R1A	2.25463	2.25463	up	-2.11536	4.64186	1.38634e-05	0.000393094	2.08892
FERMT1	-2.36375	2.36375	down	-4.43258	-4.64147	1.38836e-05	0.000393286	2.08751
RP11-143A12.3	2.5642	2.5642	up	-5.22762	4.64065	1.39269e-05	0.000394322	2.08449
MMP16	2.52732	2.52732	up	-5.42141	4.63975	1.39745e-05	0.000395287	2.08119
OR7E122P	-2.93733	2.93733	down	-6.983	-4.63948	1.39886e-05	0.000395304	2.08021
DOCK4	1.5121	1.5121	up	-1.281	4.63823	1.40551e-05	0.0003968	2.07562
MYCNUT	3.87385	3.87385	up	-4.76031	4.63584	1.41827e-05	0.000400211	2.06686
RP11-481A20.10	3.545	3.545	up	-6.71954	4.63244	1.43661e-05	0.000404994	2.05443
SLFN12L	2.92326	2.92326	up	-5.50294	4.6323	1.43736e-05	0.000405012	2.05392
SNX20	1.88054	1.88054	up	-1.99264	4.63081	1.44545e-05	0.000406706	2.04848
BCHE	-2.18147	2.18147	down	0.198435	-4.62951	1.45259e-05	0.000408517	2.04372
ZNF99	-1.95553	1.95553	down	-8.70955	-4.62871	1.45699e-05	0.000409559	2.04078
RP11-225H22.4	3.0278	3.0278	up	-5.08876	4.62826	1.45944e-05	0.000410049	2.03916
CNN3P1	-2.15653	2.15653	down	-8.87389	-4.62797	1.46107e-05	0.000410115	2.03808
AC017002.1	3.33141	3.33141	up	-6.77796	4.62747	1.46383e-05	0.000410692	2.03625
RP11-88G17.6	1.84449	1.84449	up	-8.59948	4.62516	1.47663e-05	0.000413295	2.02782
CFAP70	-1.68616	1.68616	down	-1.60665	-4.62152	1.49711e-05	0.000418625	2.01449
TNIP3	2.86996	2.86996	up	-7.08846	4.61963	1.50782e-05	0.000421019	2.00758
ABCG4	2.04987	2.04987	up	-4.367	4.61928	1.50978e-05	0.000421365	2.00633
IQCJ-SCHIP1	1.90158	1.90158	up	-1.52659	4.61881	1.51246e-05	0.000421711	2.00461
CTC-575N7.1	2.33705	2.33705	up	-1.91626	4.6184	1.51479e-05	0.00042216	2.00312
ZNF69	-1.63753	1.63753	down	-0.222429	-4.61632	1.52677e-05	0.000425094	1.99549
SPEF1	-1.7625	1.7625	down	-2.80732	-4.61531	1.53259e-05	0.000426309	1.99181
EGR2	1.68641	1.68641	up	-1.85301	4.61261	1.54827e-05	0.000430263	1.98195
CDH1	1.70753	1.70753	up	5.90136	4.6086	1.57184e-05	0.000435709	1.96733
AC017002.2	2.20465	2.20465	up	-8.64377	4.60542	1.5908e-05	0.000440202	1.95572
GPR31	1.7631	1.7631	up	-8.92244	4.60486	1.59414e-05	0.000440917	1.9537
PCDH20	-2.04234	2.04234	down	-6.0869	-4.60468	1.59523e-05	0.000441009	1.95304
EGF	2.47892	2.47892	up	-3.23843	4.60368	1.60125e-05	0.000442257	1.94939
TICAM2	1.50031	1.50031	up	-1.22735	4.60278	1.60669e-05	0.00044355	1.94611
MYO5B	1.88042	1.88042	up	-0.376395	4.60266	1.60745e-05	0.000443553	1.94564
RP11-1167A19.2	-3.40632	3.40632	down	-5.62245	-4.60089	1.61821e-05	0.000446099	1.93919
CACNA1I	2.31016	2.31016	up	-7.17827	4.59918	1.62862e-05	0.000448549	1.93298
ANGPTL7	1.61399	1.61399	up	-1.24845	4.59792	1.63635e-05	0.000450466	1.9284
TPRXL	-3.08255	3.08255	down	-5.32165	-4.59593	1.6487e-05	0.000453282	1.92113
UNC5A	1.87028	1.87028	up	-3.55932	4.59577	1.64971e-05	0.000453291	1.92053
SUSD4	2.5806	2.5806	up	-4.25868	4.59252	1.66997e-05	0.000457998	1.90872
CD3G	3.00879	3.00879	up	-3.82511	4.59218	1.67209e-05	0.000458367	1.90749
TNFSF13B	1.65463	1.65463	up	-1.63696	4.58878	1.69363e-05	0.000462108	1.89511
ANO4	2.4685	2.4685	up	-2.90548	4.58825	1.69702e-05	0.000462602	1.89317
LINC00494	2.26138	2.26138	up	-2.59961	4.58774	1.7003e-05	0.000463282	1.8913
RP1-122K4.2	2.53104	2.53104	up	-8.46859	4.58459	1.72056e-05	0.000468147	1.87984
PGR	2.21144	2.21144	up	-8.00203	4.58114	1.74301e-05	0.000473595	1.8673
SHISA8	2.67874	2.67874	up	-5.9546	4.57852	1.76026e-05	0.000477177	1.85777
LINC00092	1.79832	1.79832	up	-1.6897	4.57794	1.76407e-05	0.000477766	1.85568
FPR3	1.52776	1.52776	up	-0.0335266	4.57431	1.78829e-05	0.000483434	1.84248
RP11-302B13.1	2.45755	2.45755	up	-1.23277	4.57385	1.79141e-05	0.000484053	1.8408
MYPN	1.77136	1.77136	up	-8.83188	4.56856	1.82733e-05	0.000492395	1.8216
AC109826.1	1.74403	1.74403	up	-1.52699	4.56784	1.83228e-05	0.000493276	1.81898
SLC26A8	1.83819	1.83819	up	-4.03572	4.56682	1.83932e-05	0.000494945	1.81527
AC079610.2	-2.31611	2.31611	down	-6.80748	-4.55834	1.89874e-05	0.000509063	1.78452
STXBP5L	-2.50488	2.50488	down	-4.75981	-4.55508	1.9221e-05	0.000513914	1.77269
VWA8-AS1	-2.09316	2.09316	down	-6.40395	-4.55488	1.92355e-05	0.000514068	1.77196
RP11-440I14.3	-2.87149	2.87149	down	-7.96273	-4.55226	1.94255e-05	0.000517868	1.76246
B3GALT2	2.67936	2.67936	up	-6.10425	4.55089	1.95254e-05	0.000519451	1.7575
FKBP5	1.68297	1.68297	up	1.76735	4.55088	1.95256e-05	0.000519451	1.75749
GNLY	1.964	1.964	up	-0.181803	4.54928	1.96434e-05	0.000521725	1.75167
AP000439.2	3.15791	3.15791	up	-6.75234	4.54909	1.96571e-05	0.000521763	1.751
RHBDL2	2.04562	2.04562	up	-3.0366	4.54819	1.97237e-05	0.00052282	1.74773
MS4A6A	1.52677	1.52677	up	2.87444	4.54519	1.99467e-05	0.000527538	1.73685
AF131216.5	2.40923	2.40923	up	-1.60381	4.54418	2.00222e-05	0.000528819	1.7332
ITGA4	2.50365	2.50365	up	-3.1395	4.5431	2.01031e-05	0.00053	1.7293
LILRB1	1.53995	1.53995	up	-1.95087	4.54286	2.01211e-05	0.000530235	1.72844
CTD-2195M15.3	-2.78968	2.78968	down	-8.39074	-4.54114	2.02511e-05	0.000532703	1.72221
DOCK10	2.02597	2.02597	up	0.827578	4.53927	2.03935e-05	0.000535247	1.71543
IFI6	1.74716	1.74716	up	5.93089	4.53801	2.04895e-05	0.000537525	1.7109
LYZ	2.22462	2.22462	up	2.44009	4.53775	2.05093e-05	0.000537803	1.70996
SP5	2.11188	2.11188	up	-7.94857	4.53737	2.05388e-05	0.000538098	1.70857
ADAM23	2.20802	2.20802	up	3.33992	4.53711	2.05583e-05	0.000538167	1.70765
ZDHHC15	-1.99406	1.99406	down	-3.07702	-4.53631	2.062e-05	0.000538982	1.70476
CTC-498J12.1	-3.41845	3.41845	down	-4.40714	-4.53621	2.06278e-05	0.000538982	1.70439
CAPN11	2.13243	2.13243	up	-5.35061	4.53196	2.09587e-05	0.00054568	1.68901
STAT1	1.53238	1.53238	up	4.15574	4.53133	2.10074e-05	0.000546707	1.68676
CLNK	2.13624	2.13624	up	-8.2709	4.53119	2.10187e-05	0.000546758	1.68624
XCL1	2.96409	2.96409	up	-5.16227	4.53061	2.10646e-05	0.000547465	1.68413
CDH23	1.69412	1.69412	up	-2.36881	4.53024	2.10938e-05	0.00054798	1.68279
ERVFRD-1	-2.11687	2.11687	down	-3.22197	-4.52999	2.11137e-05	0.000548253	1.68188
HCRTR1	1.73599	1.73599	up	-8.99898	4.5233	2.16476e-05	0.000560131	1.65774
MMP1	3.06204	3.06204	up	-4.77111	4.52199	2.17541e-05	0.000561895	1.653
GDF15	1.84069	1.84069	up	5.93603	4.52157	2.17881e-05	0.000562524	1.65149
LINC00866	-3.06221	3.06221	down	-7.36454	-4.5211	2.18264e-05	0.000563016	1.64979
CHGB	-2.25288	2.25288	down	0.193194	-4.52006	2.1911e-05	0.00056495	1.64605
EVI2B	1.72045	1.72045	up	-0.418382	4.5181	2.20717e-05	0.000568594	1.63899
FOXC2	1.51383	1.51383	up	-3.44455	4.51735	2.21336e-05	0.000569734	1.63628
RP11-396O20.2	-3.28456	3.28456	down	-4.48829	-4.51733	2.21354e-05	0.000569734	1.6362
RP11-674N23.4	2.23809	2.23809	up	-8.60313	4.51266	2.25242e-05	0.000578471	1.61937
SLC6A3	2.03084	2.03084	up	-3.2273	4.51064	2.26948e-05	0.000582086	1.61209
LINC01606	2.79589	2.79589	up	-6.80932	4.5073	2.29796e-05	0.000588359	1.60004
BST2	1.82438	1.82438	up	4.19967	4.50584	2.31051e-05	0.0005908	1.59477
KIR3DL1	2.32796	2.32796	up	-7.32793	4.50538	2.31444e-05	0.000591427	1.59313
CTD-3064M3.3	2.059	2.059	up	-3.70761	4.50192	2.3445e-05	0.000597961	1.58066
RP11-422N16.3	-2.06786	2.06786	down	-7.93778	-4.5019	2.34464e-05	0.000597961	1.5806
TNF	2.77374	2.77374	up	-5.39495	4.50127	2.35019e-05	0.000598854	1.57832
XXyac-YM21GA2.4	-3.82159	3.82159	down	-7.00096	-4.50094	2.35307e-05	0.000599328	1.57713
OASL	2.10696	2.10696	up	-0.691609	4.50063	2.35578e-05	0.000599756	1.57602
CTNND2	2.40852	2.40852	up	-0.827919	4.50051	2.35686e-05	0.000599771	1.57558
AL035610.2	-4.23146	4.23146	down	-6.86899	-4.49946	2.36605e-05	0.000601847	1.57182
CACNG5	2.82386	2.82386	up	-4.07136	4.49903	2.36989e-05	0.000602563	1.57025
RP11-475O6.1	-3.11495	3.11495	down	-3.47302	-4.49551	2.40112e-05	0.000608391	1.5576
TSPAN5	1.67626	1.67626	up	0.660343	4.49366	2.41768e-05	0.000611755	1.55096
KB-1836B5.1	-1.69568	1.69568	down	-3.30244	-4.49356	2.41857e-05	0.000611755	1.55061
RP1-7G5.6	-2.50975	2.50975	down	-7.90182	-4.49244	2.42875e-05	0.000613535	1.54655
MSC-AS1	-1.67067	1.67067	down	1.45358	-4.492	2.43272e-05	0.000614007	1.54497
CCL22	2.56043	2.56043	up	-6.30189	4.48887	2.46119e-05	0.000620125	1.53373
LINC00595	2.66162	2.66162	up	-8.06449	4.4814	2.53053e-05	0.000633956	1.50689
RP11-100E13.1	3.19633	3.19633	up	-7.37884	4.476	2.58185e-05	0.000645253	1.4875
RP11-598F7.6	1.74521	1.74521	up	-3.44333	4.47366	2.6043e-05	0.000650032	1.47914
BARX1	2.72641	2.72641	up	-5.00504	4.47298	2.61097e-05	0.000650866	1.47667
SKAP1	2.15376	2.15376	up	-2.22066	4.47162	2.6241e-05	0.000653304	1.47183
PCDHA8	-2.50737	2.50737	down	-7.81153	-4.46908	2.64902e-05	0.000658635	1.4627
PVRL4	2.4337	2.4337	up	-6.45365	4.46633	2.67621e-05	0.000664709	1.45284
RIMBP3	2.30445	2.30445	up	-3.66199	4.46585	2.68097e-05	0.000665482	1.45112
IRS4	-2.56327	2.56327	down	-4.00363	-4.46535	2.68589e-05	0.000666421	1.44935
ARNTL2	2.41325	2.41325	up	-5.97024	4.46444	2.69504e-05	0.000668409	1.44607
LTF	1.83979	1.83979	up	-2.5322	4.46413	2.69812e-05	0.000668889	1.44497
ADGRG1	1.66646	1.66646	up	6.33565	4.46096	2.73008e-05	0.000675668	1.4336
HECW2	1.53219	1.53219	up	-4.04785	4.45774	2.76282e-05	0.000683195	1.42208
AQP4	2.9137	2.9137	up	-4.50045	4.45492	2.7919e-05	0.000689802	1.41198
RP11-48B3.3	1.95607	1.95607	up	-3.74843	4.45356	2.80599e-05	0.0006927	1.40712
KCNK13	1.71649	1.71649	up	-4.35656	4.44909	2.8528e-05	0.000702479	1.39115
PIGR	2.24286	2.24286	up	-7.83659	4.44765	2.868e-05	0.000705334	1.38601
LY96	2.07755	2.07755	up	4.05308	4.44515	2.89469e-05	0.000710464	1.37707
TLR1	-1.53023	1.53023	down	-0.100523	-4.44019	2.94837e-05	0.000722671	1.35934
ENPP7	1.63612	1.63612	up	-9.07161	4.43925	2.95861e-05	0.000724878	1.35599
CTB-191K22.6	-3.66618	3.66618	down	-5.58634	-4.43791	2.97335e-05	0.000727881	1.35119
TMEM132E	1.81542	1.81542	up	-4.44172	4.43458	3.01017e-05	0.000736279	1.33932
NR2F1-AS1	1.83865	1.83865	up	-1.68069	4.43442	3.01195e-05	0.000736406	1.33875
UTS2R	2.52314	2.52314	up	-7.66152	4.43378	3.0191e-05	0.000737848	1.33646
LINC01102	-2.50911	2.50911	down	-4.31301	-4.43058	3.05503e-05	0.000744453	1.32504
CTA-384D8.35	3.2469	3.2469	up	-6.95033	4.42966	3.0654e-05	0.000746671	1.32177
HSFX1	-1.56744	1.56744	down	-1.26584	-4.42801	3.08409e-05	0.000750911	1.3159
RPS2P32	1.51388	1.51388	up	-0.850918	4.42562	3.11152e-05	0.000756331	1.30736
TMEM207	-1.80814	1.80814	down	-8.81063	-4.42502	3.1184e-05	0.000757504	1.30523
TRGV10	3.60575	3.60575	up	-6.57602	4.42497	3.11893e-05	0.000757504	1.30507
TMSB15B	-1.72904	1.72904	down	-0.738628	-4.42153	3.15883e-05	0.000764658	1.2928
FAM20A	1.56881	1.56881	up	1.39074	4.42123	3.16233e-05	0.000765191	1.29173
C16orf54	2.35548	2.35548	up	-3.78242	4.41911	3.18717e-05	0.00076961	1.28418
RP5-991G20.2	-2.08546	2.08546	down	-3.58445	-4.41787	3.20183e-05	0.00077188	1.27976
PLCH1-AS1	-3.09475	3.09475	down	-4.31989	-4.4105	3.28999e-05	0.000790617	1.25355
HLA-DRB5	2.14872	2.14872	up	3.33202	4.40975	3.29918e-05	0.000791762	1.25086
BHLHA15	3.09816	3.09816	up	-5.26189	4.40717	3.33063e-05	0.000797349	1.24171
TRIM9	1.54902	1.54902	up	-2.04222	4.40682	3.33493e-05	0.000798054	1.24046
KIT	1.79202	1.79202	up	4.98483	4.40565	3.3494e-05	0.000800536	1.23629
CDH17	2.54224	2.54224	up	-7.16576	4.40488	3.35884e-05	0.000801922	1.23357
LINGO3	2.48322	2.48322	up	-5.53697	4.40306	3.38146e-05	0.000806553	1.2271
ECEL1	2.34144	2.34144	up	-3.64193	4.40188	3.39622e-05	0.000809415	1.2229
ZBP1	2.7634	2.7634	up	-4.37148	4.40075	3.41041e-05	0.000810804	1.21888
LETM1P2	-2.30904	2.30904	down	-7.53274	-4.40013	3.41819e-05	0.000812007	1.21668
CEND1	1.71927	1.71927	up	-2.5608	4.39908	3.43142e-05	0.000813501	1.21295
RP11-485M7.3	3.04691	3.04691	up	-6.3731	4.39879	3.43508e-05	0.000814039	1.21193
MGAT3	1.68954	1.68954	up	-2.00525	4.39344	3.50336e-05	0.000828879	1.19294
FGF5	2.25101	2.25101	up	-8.57233	4.39236	3.51737e-05	0.000831521	1.1891
LINGO2	-2.20777	2.20777	down	-2.95063	-4.38698	3.58769e-05	0.000845416	1.17001
AC003973.3	-2.98353	2.98353	down	-5.46565	-4.38537	3.60892e-05	0.000849345	1.16432
LTA	2.52044	2.52044	up	-4.83462	4.38528	3.61016e-05	0.000849345	1.16399
TONSL-AS1	2.01076	2.01076	up	-1.63302	4.38376	3.63036e-05	0.000853412	1.15861
C10orf105	2.13226	2.13226	up	-7.58661	4.38268	3.64478e-05	0.00085577	1.15479
SNCA	-1.58406	1.58406	down	4.58805	-4.38228	3.65013e-05	0.000856683	1.15337
HECW1	3.16525	3.16525	up	-6.48911	4.38153	3.66015e-05	0.000858692	1.15073
CALHM1	1.84514	1.84514	up	-8.20657	4.37408	3.76178e-05	0.000879013	1.12432
SLFN11	1.55072	1.55072	up	-0.74271	4.37349	3.7699e-05	0.00088021	1.12224
ADAMTS5	1.97451	1.97451	up	-4.63443	4.37318	3.77413e-05	0.000880846	1.12116
LINC00882	-1.81331	1.81331	down	-1.31362	-4.36928	3.82864e-05	0.000891791	1.10734
RP11-128M1.1	-1.93055	1.93055	down	-1.40279	-4.36634	3.8701e-05	0.000900375	1.09696
FAM172BP	1.75169	1.75169	up	-9.10104	4.3643	3.89921e-05	0.000906067	1.08974
RP5-1071N3.1	2.30551	2.30551	up	-6.65812	4.36381	3.90618e-05	0.000906968	1.08801
PCDHA12	-2.89592	2.89592	down	-6.16815	-4.36294	3.91864e-05	0.00090914	1.08494
ZNF793	-1.90035	1.90035	down	-1.56098	-4.36161	3.9378e-05	0.000913223	1.08024
ZP4	-2.84525	2.84525	down	-7.73654	-4.3584	3.9844e-05	0.000922934	1.06891
ANKRD26P3	2.40129	2.40129	up	-7.17754	4.35677	4.0083e-05	0.000927694	1.06314
AC137932.6	1.69561	1.69561	up	0.509787	4.35584	4.02192e-05	0.000929419	1.05987
USP30-AS1	3.06086	3.06086	up	-3.45318	4.3536	4.05504e-05	0.000936336	1.05197
RP11-441F2.5	-2.14003	2.14003	down	-5.18582	-4.35063	4.09946e-05	0.000944359	1.04147
RP5-875H18.10	-3.28426	3.28426	down	-6.45735	-4.34941	4.11772e-05	0.000947567	1.03719
RP13-46H24.1	-2.681	2.681	down	-3.46307	-4.34927	4.11986e-05	0.000947567	1.03669
TNNI3	-2.26376	2.26376	down	-1.67576	-4.34873	4.12799e-05	0.000949065	1.03479
TFPI2	2.27554	2.27554	up	1.96574	4.34722	4.15099e-05	0.000952723	1.02944
TRBV15	3.35613	3.35613	up	-6.99653	4.34704	4.15366e-05	0.000952723	1.02882
ZBTB8B	-1.88155	1.88155	down	-6.45648	-4.34599	4.16968e-05	0.000956023	1.02511
FENDRR	2.25603	2.25603	up	-7.85465	4.34533	4.17966e-05	0.000957936	1.0228
CTC-260E6.3	-1.99556	1.99556	down	-7.98219	-4.34216	4.2285e-05	0.000967238	1.01161
PLEK	1.50464	1.50464	up	-0.107473	4.33721	4.30574e-05	0.000984138	0.994171
RP13-33H18.1	2.88126	2.88126	up	-5.7891	4.33594	4.32576e-05	0.000987942	0.989703
AC090505.5	-2.72303	2.72303	down	-6.86505	-4.33239	4.38211e-05	0.000999254	0.977235
RP11-496H1.1	-2.33471	2.33471	down	-1.66406	-4.32908	4.43542e-05	0.00101023	0.965588
LINC01389	2.69411	2.69411	up	-8.03348	4.32797	4.45345e-05	0.00101355	0.961681
RP11-16E18.3	1.50068	1.50068	up	-2.05931	4.3259	4.48723e-05	0.00101956	0.954402
CDCP1	1.88699	1.88699	up	-3.86816	4.32582	4.48856e-05	0.00101956	0.954116
BNIP3P17	-3.04708	3.04708	down	-6.53698	-4.32559	4.49239e-05	0.00102003	0.953294
FERMT3	1.58534	1.58534	up	5.34437	4.32414	4.51613e-05	0.00102384	0.94822
TRBV7-3	3.65748	3.65748	up	-6.74995	4.32196	4.55232e-05	0.00103045	0.940532
EMB	1.62202	1.62202	up	-1.91597	4.32137	4.56199e-05	0.00103224	0.938489
TRAV22	2.92665	2.92665	up	-8.06752	4.32123	4.56438e-05	0.00103238	0.937984
LY86-AS1	-2.90045	2.90045	down	-7.33738	-4.32076	4.57216e-05	0.00103374	0.936343
SGK1	1.71623	1.71623	up	3.82243	4.32004	4.58431e-05	0.00103548	0.933788
PALMD	-2.12327	2.12327	down	1.08778	-4.31905	4.60084e-05	0.00103822	0.930321
RP11-815J21.4	3.05427	3.05427	up	-6.14325	4.31856	4.60907e-05	0.00103894	0.9286
IBSP	3.00673	3.00673	up	-7.32585	4.3178	4.6219e-05	0.00104121	0.925925
RP11-20I20.4	1.81667	1.81667	up	0.944884	4.31595	4.65319e-05	0.00104683	0.919428
LINC00861	2.90757	2.90757	up	-6.38424	4.31583	4.65508e-05	0.00104683	0.919035
CA4	-2.16508	2.16508	down	0.512427	-4.31348	4.69524e-05	0.00105384	0.910764
AC108463.2	3.23997	3.23997	up	-7.21234	4.31114	4.73541e-05	0.00106164	0.90256
HMCN2	2.09452	2.09452	up	-6.01589	4.31064	4.74404e-05	0.00106316	0.900807
LPAR1	1.86681	1.86681	up	-2.62261	4.30863	4.77894e-05	0.00106894	0.893751
CACNG4	1.7951	1.7951	up	-5.71583	4.30632	4.81926e-05	0.00107549	0.885661
RP11-456K23.1	1.73706	1.73706	up	-3.90871	4.30612	4.82274e-05	0.00107586	0.884968
RP6-24A23.3	-2.39199	2.39199	down	-2.14881	-4.3048	4.846e-05	0.00108064	0.880335
PLA2G7	2.15278	2.15278	up	-0.96211	4.30311	4.87598e-05	0.00108608	0.874396
TRGV4	2.89611	2.89611	up	-7.54802	4.30161	4.90252e-05	0.00109034	0.869171
G0S2	2.04833	2.04833	up	-2.47926	4.30109	4.91191e-05	0.00109159	0.86733
RORC	-3.18031	3.18031	down	-2.80145	-4.30076	4.91782e-05	0.00109249	0.866171
KRT18P17	-2.33821	2.33821	down	-7.48947	-4.29923	4.94521e-05	0.00109775	0.860825
RP11-634B7.4	-2.95954	2.95954	down	-6.4563	-4.29855	4.95751e-05	0.00109997	0.858433
FDCSP	3.47396	3.47396	up	-3.19599	4.29837	4.96077e-05	0.00109997	0.8578
ANKRD29	1.65743	1.65743	up	-2.90101	4.29822	4.96337e-05	0.00110011	0.857296
GABRA5	2.87126	2.87126	up	-2.09078	4.29729	4.98028e-05	0.00110344	0.854022
S1PR5	1.86513	1.86513	up	-3.39872	4.29667	4.99142e-05	0.00110549	0.851872
RP11-1C8.5	1.84692	1.84692	up	-8.5118	4.29564	5.01028e-05	0.00110799	0.848242
CTD-2541J13.1	1.93811	1.93811	up	-7.65242	4.2953	5.01638e-05	0.00110809	0.847071
RP6-24A23.6	-3.4446	3.4446	down	-6.18093	-4.2941	5.03834e-05	0.0011121	0.842866
SULT4A1	-1.5013	1.5013	down	-0.269849	-4.29101	5.09524e-05	0.00112338	0.832056
MTUS2	2.15009	2.15009	up	-6.25198	4.29069	5.10119e-05	0.00112385	0.830933
BEX1	-2.5422	2.5422	down	0.899551	-4.28983	5.11715e-05	0.0011261	0.827928
DBX2	1.70261	1.70261	up	-8.5589	4.28829	5.14595e-05	0.00113116	0.822525
TMEM171	1.94826	1.94826	up	-1.65131	4.28638	5.18165e-05	0.00113688	0.815871
SH3PXD2A-AS1	1.52027	1.52027	up	-0.213934	4.28364	5.23362e-05	0.00114742	0.806267
ZNF702P	-1.9364	1.9364	down	-1.69934	-4.28326	5.24079e-05	0.00114831	0.80495
CECR7	-1.8856	1.8856	down	-2.28547	-4.28321	5.24161e-05	0.00114831	0.804798
SLAMF1	2.32399	2.32399	up	-4.25454	4.28182	5.26818e-05	0.0011537	0.799934
RP11-187O7.1	-2.29193	2.29193	down	-5.60673	-4.28127	5.27866e-05	0.00115557	0.798021
MC5R	2.58064	2.58064	up	-7.59432	4.27804	5.34096e-05	0.00116746	0.786731
RP11-203P23.2	3.95566	3.95566	up	-6.64907	4.27783	5.345e-05	0.00116791	0.786002
CORO2B	1.51852	1.51852	up	2.38603	4.27722	5.35692e-05	0.00116964	0.783859
TRAV13-1	3.63064	3.63064	up	-7.13166	4.27658	5.36943e-05	0.00117086	0.781616
CTD-2377O17.1	-2.46496	2.46496	down	-6.05078	-4.27526	5.39504e-05	0.00117533	0.777037
CTD-2341M24.1	2.3668	2.3668	up	-1.98695	4.27139	5.47138e-05	0.00118887	0.763519
CABP7	2.42117	2.42117	up	-2.7582	4.2699	5.50095e-05	0.00119369	0.758331
LINC01122	-2.22975	2.22975	down	-3.22937	-4.26826	5.5339e-05	0.00119801	0.752586
RASGRF1	1.8844	1.8844	up	-2.05876	4.26753	5.54839e-05	0.00120041	0.75007
ST8SIA4	1.7328	1.7328	up	-3.06683	4.26672	5.56486e-05	0.00120205	0.747219
SYT11	1.59835	1.59835	up	-0.727547	4.26036	5.69445e-05	0.00122732	0.725075
SCD5	1.5829	1.5829	up	0.70582	4.25062	5.89881e-05	0.0012659	0.691163
AC093620.5	2.7486	2.7486	up	-3.79181	4.25059	5.89935e-05	0.0012659	0.691075
TCTE1	-1.66078	1.66078	down	-4.41836	-4.25004	5.91118e-05	0.00126797	0.689149
RPL3L	-1.51364	1.51364	down	-3.9889	-4.24782	5.95871e-05	0.00127592	0.681447
KLRC1	2.82527	2.82527	up	-7.09959	4.24764	5.96253e-05	0.00127618	0.680831
RP11-472N13.3	3.61594	3.61594	up	-5.75607	4.24647	5.98793e-05	0.00128115	0.676742
LRAT	-1.57613	1.57613	down	-2.03279	-4.24549	6.00905e-05	0.00128495	0.673357
PXDNL	2.05814	2.05814	up	-5.1013	4.24534	6.01229e-05	0.00128495	0.672839
RP11-90P13.1	1.67887	1.67887	up	-4.42834	4.2452	6.0154e-05	0.00128515	0.672342
FLT3	2.23534	2.23534	up	-6.91766	4.24375	6.04704e-05	0.0012905	0.667297
PEG3	-2.22241	2.22241	down	-1.24725	-4.24339	6.05491e-05	0.00129171	0.666047
CRTAM	2.51219	2.51219	up	-4.99284	4.24325	6.05789e-05	0.00129187	0.665574
AGBL1	1.63349	1.63349	up	-8.55647	4.24236	6.0775e-05	0.00129511	0.662465
C19orf81	-2.63424	2.63424	down	-1.35023	-4.2385	6.16286e-05	0.00131187	0.649054
RP11-493L12.6	2.86047	2.86047	up	-8.4054	4.2382	6.16953e-05	0.00131281	0.648015
CLDN3	2.22271	2.22271	up	-2.93225	4.23786	6.17713e-05	0.00131395	0.646831
ZNF840P	-2.2015	2.2015	down	-7.56948	-4.236	6.21853e-05	0.00132084	0.640408
CLIC2	1.69725	1.69725	up	-0.623253	4.23582	6.22275e-05	0.00132126	0.639757
TRGV2	3.133	3.133	up	-7.48225	4.23546	6.23087e-05	0.0013225	0.638503
ITGB2-AS1	2.17944	2.17944	up	-4.12033	4.23347	6.27561e-05	0.00133055	0.631625
OR2W3	-2.78814	2.78814	down	-4.09001	-4.2309	6.33414e-05	0.0013415	0.6227
TCN1	3.2172	3.2172	up	-3.52809	4.2308	6.33648e-05	0.00134152	0.622344
PCDHB9	-1.86382	1.86382	down	-2.48092	-4.22953	6.36556e-05	0.0013467	0.617943
RP5-942I16.1	-2.54235	2.54235	down	-5.08596	-4.22912	6.37482e-05	0.00134768	0.616546
ATP1B1	1.52474	1.52474	up	2.22909	4.22902	6.3773e-05	0.00134772	0.616172
GRIK3	-2.34407	2.34407	down	-1.72742	-4.22862	6.38634e-05	0.00134915	0.61481
AC005609.20	-2.80209	2.80209	down	-7.87564	-4.22641	6.43755e-05	0.00135947	0.607132
RP11-430H10.1	-2.31086	2.31086	down	-1.25916	-4.2251	6.46798e-05	0.00136492	0.6026
LCE2A	3.16836	3.16836	up	-4.26011	4.22281	6.52149e-05	0.00137423	0.59468
POMC	2.32557	2.32557	up	-0.493332	4.22218	6.53634e-05	0.00137686	0.592495
CRYM	2.39937	2.39937	up	-1.321	4.22168	6.54825e-05	0.00137804	0.590744
CECR5-AS1	-2.45369	2.45369	down	-1.4057	-4.22144	6.55381e-05	0.00137806	0.589928
CTC-360J11.4	-2.36649	2.36649	down	-6.32872	-4.22083	6.56819e-05	0.00138059	0.587823
LINC00884	-1.63547	1.63547	down	-3.47683	-4.22072	6.57099e-05	0.00138069	0.587413
ANKRD22	2.96321	2.96321	up	-5.3866	4.22023	6.58242e-05	0.0013821	0.585742
RPS20P22	2.71711	2.71711	up	-6.63393	4.21963	6.59678e-05	0.00138462	0.583647
FAM216B	2.18747	2.18747	up	-7.34658	4.21789	6.63825e-05	0.00139132	0.577625
RP11-297N6.4	-1.71273	1.71273	down	-1.75579	-4.21713	6.65641e-05	0.00139402	0.575
TOX	2.08603	2.08603	up	-4.00625	4.21705	6.65824e-05	0.00139402	0.574734
ABCD2	2.36718	2.36718	up	-6.38008	4.21586	6.68691e-05	0.00139852	0.570606
ZNF727	-2.96003	2.96003	down	-5.79047	-4.21355	6.74266e-05	0.00140717	0.562627
ZNF66	-1.79396	1.79396	down	-2.12693	-4.21295	6.75737e-05	0.00140873	0.560532
RP11-295M3.4	2.23655	2.23655	up	-4.19411	4.21176	6.78628e-05	0.00141375	0.55643
ENPP7P2	-2.72329	2.72329	down	-6.76618	-4.21116	6.80087e-05	0.00141629	0.554367
ZNF385D	2.75308	2.75308	up	-5.30632	4.20989	6.83204e-05	0.00142026	0.549972
RP11-289F5.1	-2.59874	2.59874	down	-7.29441	-4.20651	6.91555e-05	0.00143253	0.538298
PRDM16	1.95987	1.95987	up	-4.36772	4.20251	7.0159e-05	0.00145075	0.524456
LRG1	1.84399	1.84399	up	-3.73579	4.20211	7.02593e-05	0.00145232	0.523083
SLC8A1-AS1	2.74365	2.74365	up	-4.5908	4.20148	7.04177e-05	0.00145456	0.520921
SSX1	3.49156	3.49156	up	-1.77783	4.1964	7.17144e-05	0.00147978	0.503391
IL27	2.79121	2.79121	up	-5.89176	4.19623	7.17593e-05	0.00147981	0.502789
HES2	2.05566	2.05566	up	-3.56354	4.1962	7.17661e-05	0.00147981	0.502698
KRTAP5-1	-1.828	1.828	down	-1.847	-4.19586	7.18537e-05	0.00148109	0.501526
RP6-24A23.7	-2.07025	2.07025	down	-2.99283	-4.19434	7.22482e-05	0.00148818	0.496267
NOG	2.42424	2.42424	up	-6.60022	4.19231	7.27763e-05	0.00149642	0.489271
RP11-320A16.1	-2.92176	2.92176	down	-7.56077	-4.18799	7.39142e-05	0.00151716	0.474368
RP11-341D18.4	1.53896	1.53896	up	-9.11958	4.18457	7.48242e-05	0.00153208	0.462617
PRIMA1	1.90922	1.90922	up	0.052438	4.1815	7.56531e-05	0.00154439	0.452037
SPATA41	-1.50396	1.50396	down	-4.33798	-4.18137	7.56885e-05	0.00154439	0.451587
PAPPA	1.94692	1.94692	up	-4.09839	4.18136	7.56907e-05	0.00154439	0.451559
SNCAIP	2.10518	2.10518	up	-5.05109	4.18121	7.57324e-05	0.00154439	0.45103
GREM2	2.41272	2.41272	up	-5.44987	4.18108	7.57683e-05	0.00154439	0.450575
RP11-758N13.3	3.23562	3.23562	up	-3.53303	4.18087	7.58235e-05	0.00154498	0.449875
MYL4	2.29822	2.29822	up	-3.14894	4.17926	7.62622e-05	0.00155176	0.444336
AC053503.4	-2.30726	2.30726	down	-6.05267	-4.1751	7.7407e-05	0.00157232	0.430028
RP5-1028K7.2	3.16119	3.16119	up	-6.05556	4.17406	7.76972e-05	0.00157712	0.426435
WNT10B	2.29458	2.29458	up	-4.52352	4.17132	7.84617e-05	0.00159099	0.417034
TMEM200B	2.14306	2.14306	up	0.342668	4.1708	7.86089e-05	0.00159287	0.415234
PMCH	2.6839	2.6839	up	-7.95681	4.17046	7.87039e-05	0.00159369	0.414075
ANKRD30B	2.66162	2.66162	up	-0.622948	4.16996	7.88452e-05	0.001596	0.412352
FOXL1	1.56433	1.56433	up	-3.95307	4.16903	7.91074e-05	0.0016002	0.409164
PRRX1	1.52062	1.52062	up	-1.28175	4.16817	7.93526e-05	0.00160461	0.406193
FAM72C	2.46969	2.46969	up	-3.86063	4.16709	7.96605e-05	0.00160973	0.402475
C11orf39	-2.27831	2.27831	down	-8.23929	-4.16616	7.99251e-05	0.00161451	0.399292
RP1-102E24.8	1.91074	1.91074	up	-3.41562	4.16587	8.00081e-05	0.00161564	0.398295
IGF2BP3	2.84933	2.84933	up	-5.70101	4.16561	8.00837e-05	0.0016166	0.397388
TRBV5-4	3.14958	3.14958	up	-7.23441	4.16277	8.08996e-05	0.00163054	0.387658
CNTNAP5	3.23651	3.23651	up	-3.87547	4.16272	8.09133e-05	0.00163054	0.387495
AC012354.6	2.27635	2.27635	up	-5.51213	4.16116	8.13657e-05	0.00163909	0.382142
CYSLTR1	2.03428	2.03428	up	-4.26557	4.15992	8.17283e-05	0.00164414	0.377874
VSTM2B	2.7776	2.7776	up	-5.56773	4.15719	8.25309e-05	0.001658	0.368495
PCDHB16	-1.72558	1.72558	down	-1.43822	-4.15644	8.27499e-05	0.00166184	0.36595
ARL5AP3	2.17046	2.17046	up	-8.89431	4.15597	8.28911e-05	0.00166353	0.364314
ALG1L12P	-3.00942	3.00942	down	-5.78243	-4.15479	8.32402e-05	0.00166996	0.36028
POU2AF1	3.205	3.205	up	-6.32743	4.15082	8.44294e-05	0.00169004	0.346666
ACTG1P1	-1.99274	1.99274	down	-4.12107	-4.15077	8.44427e-05	0.00169004	0.346515
TRBV5-1	3.40388	3.40388	up	-6.02584	4.1496	8.47979e-05	0.00169599	0.342486
RP11-1042B17.3	-2.91309	2.91309	down	-4.95696	-4.14939	8.48615e-05	0.00169663	0.341767
RP11-137J7.3	2.71495	2.71495	up	-8.12274	4.1493	8.48878e-05	0.00169663	0.34147
SNRK-AS1	-2.78592	2.78592	down	-7.17136	-4.14833	8.51823e-05	0.00170135	0.338145
TRBV12-3	3.78877	3.78877	up	-6.94381	4.14427	8.64267e-05	0.00172327	0.324228
TNFAIP6	2.42004	2.42004	up	-3.5895	4.14417	8.64572e-05	0.00172329	0.32389
TEX19	2.03871	2.03871	up	-7.0793	4.14393	8.65292e-05	0.00172414	0.323091
HOXC13	2.13367	2.13367	up	-8.15765	4.14358	8.66397e-05	0.00172517	0.321866
ERVMER61-1	-2.60022	2.60022	down	-8.37493	-4.1424	8.70022e-05	0.0017318	0.31786
RAB3B	1.8048	1.8048	up	-5.29009	4.13762	8.84996e-05	0.00175981	0.301486
RP11-379B18.5	-1.51052	1.51052	down	-0.442927	-4.1349	8.93611e-05	0.00177453	0.292193
PYHIN1	2.09353	2.09353	up	-2.2712	4.13176	9.03662e-05	0.00179166	0.281462
IL6	2.66463	2.66463	up	-4.44955	4.12886	9.13023e-05	0.00180695	0.271576
RP11-496B10.3	-2.54851	2.54851	down	-7.88332	-4.12771	9.16792e-05	0.00181258	0.267624
FGFR2	1.69566	1.69566	up	-0.146152	4.12751	9.17449e-05	0.00181326	0.266937
FAM86DP	-1.52583	1.52583	down	2.26209	-4.12444	9.27507e-05	0.00183129	0.256479
AC006129.2	3.20229	3.20229	up	-6.44392	4.12407	9.28731e-05	0.00183309	0.255214
PRDM8	2.47086	2.47086	up	-4.46464	4.12369	9.29975e-05	0.00183492	0.253929
CCDC26	2.02855	2.02855	up	-3.47161	4.12289	9.32647e-05	0.00183896	0.251178
RP5-881L22.5	-3.01071	3.01071	down	-6.40685	-4.12084	9.3946e-05	0.00185177	0.244197
RP11-455O6.2	-2.93638	2.93638	down	-4.61905	-4.11374	9.63465e-05	0.00189398	0.22
PCK1	2.41333	2.41333	up	-5.93458	4.11217	9.68851e-05	0.00190329	0.214655
RP11-13K12.2	1.81921	1.81921	up	-9.06771	4.1054	9.92436e-05	0.00194116	0.191593
CTD-2357A8.3	2.58551	2.58551	up	-8.18	4.10296	0.000100104	0.00195473	0.183315
RP11-415F23.3	-2.30563	2.30563	down	-3.34688	-4.1005	0.000100982	0.00196894	0.174945
EYA4	2.45091	2.45091	up	-6.18391	4.10045	0.000101	0.00196894	0.174776
SORCS1	1.52594	1.52594	up	-2.42085	4.09939	0.000101383	0.00197568	0.171148
UGT8	2.05106	2.05106	up	-3.79052	4.09887	0.000101566	0.00197801	0.169414
RP11-394A14.2	-1.9781	1.9781	down	-8.57686	-4.09461	0.000103112	0.00200336	0.154936
LRRC10B	1.752	1.752	up	-2.17533	4.09453	0.000103141	0.00200336	0.154661
RP11-76E17.3	2.32863	2.32863	up	-8.39965	4.09418	0.000103271	0.00200393	0.153455
CLEC2L	2.99412	2.99412	up	-6.06746	4.09303	0.000103691	0.00201136	0.14957
TRAV30	2.57164	2.57164	up	-8.69626	4.09111	0.0001044	0.00202311	0.143034
ENOX1	1.71393	1.71393	up	-2.21272	4.09016	0.000104753	0.00202727	0.139798
ARX	3.66674	3.66674	up	-2.05067	4.08686	0.000105983	0.00204701	0.128614
FGL2	1.77829	1.77829	up	-0.465628	4.08631	0.000106189	0.00204965	0.126749
RP1-199J3.6	2.00552	2.00552	up	-5.73251	4.08362	0.000107205	0.0020663	0.117623
ETNPPL	2.21118	2.21118	up	-3.7788	4.08252	0.000107623	0.00207263	0.113902
CFL1P5	2.70787	2.70787	up	-3.71774	4.08251	0.000107628	0.00207263	0.113854
FAM225A	2.09421	2.09421	up	-5.8471	4.08025	0.000108491	0.0020852	0.1062
RP11-541P9.3	-2.56771	2.56771	down	-7.96742	-4.07987	0.000108637	0.0020869	0.104909
LGALS2	2.73043	2.73043	up	-2.92583	4.07982	0.000108654	0.0020869	0.104762
RP11-415I12.2	1.51645	1.51645	up	-8.90239	4.07883	0.000109037	0.00209148	0.101386
RP11-74E22.8	-1.86638	1.86638	down	-2.52135	-4.07874	0.000109071	0.00209148	0.101095
NME2P1	-1.79136	1.79136	down	-0.86539	-4.07803	0.000109344	0.00209603	0.0986998
RAB27B	2.00261	2.00261	up	-7.91656	4.07766	0.000109489	0.00209745	0.097422
LINC01358	2.96448	2.96448	up	-7.27631	4.07623	0.000110042	0.00210596	0.092601
DPEP3	2.44431	2.44431	up	-4.80056	4.07283	0.000111373	0.00212734	0.0810826
SLC22A31	2.124	2.124	up	-2.10432	4.07274	0.000111407	0.00212734	0.0807838
GFI1	2.19554	2.19554	up	-4.35536	4.07137	0.00011195	0.00213412	0.0761301
RP11-33I11.3	2.42173	2.42173	up	-8.58277	4.06821	0.000113207	0.00215527	0.0654363
AC016907.3	-1.63963	1.63963	down	-6.30513	-4.06802	0.000113282	0.00215601	0.0647942
XXbac-BPG55C20.7	-3.52707	3.52707	down	-4.41763	-4.06378	0.000114989	0.00218282	0.05047
LINC00919	-2.59774	2.59774	down	-4.77653	-4.05955	0.00011672	0.00221066	0.0361613
RP4-785G19.5	2.82558	2.82558	up	-4.44502	4.05671	0.000117893	0.00222928	0.026581
MRPL23-AS1	-1.80236	1.80236	down	-2.59795	-4.05497	0.000118619	0.00224227	0.0207063
NAP1L2	-1.68393	1.68393	down	-0.745542	-4.05428	0.000118905	0.00224696	0.0183949
STATH	3.31658	3.31658	up	-7.53171	4.05388	0.000119074	0.0022487	0.0170392
AC024937.6	-2.71956	2.71956	down	-3.54379	-4.05319	0.000119365	0.00225346	0.0147031
LGI4	-1.89345	1.89345	down	0.712842	-4.05248	0.000119663	0.00225709	0.012312
ITK	2.25034	2.25034	up	-4.08769	4.0508	0.000120373	0.00226738	0.00665009
RP11-698N11.2	2.38962	2.38962	up	-8.61314	4.0507	0.000120414	0.00226744	0.00631765
ZNF229	-2.12317	2.12317	down	-1.24432	-4.0494	0.000120971	0.00227572	0.00190204
AC006116.15	-2.33925	2.33925	down	-5.65887	-4.04914	0.000121079	0.00227702	0.00104941
ZNF560	-3.56095	3.56095	down	-4.43053	-4.04561	0.000122596	0.00229964	-0.0108723
LBP	1.60231	1.60231	up	-8.81336	4.04455	0.00012305	0.00230743	-0.0144156
AC011516.2	-2.76086	2.76086	down	-7.53524	-4.04403	0.000123279	0.00231098	-0.0161945
MARVELD3	2.27039	2.27039	up	-5.4632	4.04302	0.000123718	0.00231772	-0.0195947
RP5-912I13.1	2.39604	2.39604	up	-6.96354	4.04105	0.000124577	0.00232976	-0.0262232
RP11-1143G9.4	3.83473	3.83473	up	-1.95191	4.03896	0.000125494	0.00234425	-0.0332424
LGALS7B	3.01641	3.01641	up	-7.28092	4.0344	0.000127524	0.0023761	-0.0486019
UNC5B-AS1	3.17163	3.17163	up	-4.87943	4.03427	0.00012758	0.0023764	-0.0490287
ACRC	1.51915	1.51915	up	-2.05485	4.03057	0.000129253	0.00240413	-0.0614969
SFN	2.18011	2.18011	up	-4.18247	4.02925	0.000129852	0.00241335	-0.0659245
TNFSF15	1.67964	1.67964	up	-5.2594	4.02682	0.000130965	0.00243171	-0.0740891
SLC28A3	1.70371	1.70371	up	-8.51933	4.02624	0.000131232	0.00243358	-0.076035
TRBV4-2	3.71486	3.71486	up	-6.30147	4.02573	0.000131465	0.00243713	-0.0777347
ZNF382	-1.90766	1.90766	down	-2.14096	-4.0235	0.000132501	0.00245458	-0.0852485
BIRC3	2.05633	2.05633	up	-2.60403	4.0192	0.000134515	0.00248738	-0.0996832
RP4-800J21.3	-2.21436	2.21436	down	-4.87772	-4.01874	0.000134729	0.002489	-0.101209
LINC00881	-2.81475	2.81475	down	-6.5707	-4.01874	0.00013473	0.002489	-0.101211
CTD-2231H16.1	2.59611	2.59611	up	-0.411706	4.01771	0.00013522	0.00249568	-0.104683
FMN1	1.50358	1.50358	up	2.96701	4.01347	0.000137245	0.00252591	-0.11891
RP11-10A14.4	-2.13871	2.13871	down	0.084157	-4.01298	0.000137481	0.00252945	-0.120552
LINC01593	-2.07001	2.07001	down	-8.9177	-4.01275	0.000137589	0.00252986	-0.121306
LGR6	1.64252	1.64252	up	-2.75868	4.01209	0.000137908	0.00253332	-0.123519
SLC3A1	-2.57645	2.57645	down	-2.57187	-4.012	0.000137951	0.00253332	-0.123815
FAM171B	1.64961	1.64961	up	-2.17701	4.01104	0.000138419	0.00254032	-0.127055
FCRL6	1.92745	1.92745	up	-3.97332	4.00771	0.00014004	0.00256687	-0.138199
CHRNA4	2.64972	2.64972	up	-6.04523	4.0073	0.000140242	0.00256976	-0.139576
LRRC3B	2.28404	2.28404	up	-5.67326	4.00715	0.000140317	0.00257019	-0.140086
CCL26	2.47838	2.47838	up	-2.28464	4.00218	0.000142776	0.0026056	-0.156705
TRBV19	3.4644	3.4644	up	-5.30003	3.99883	0.000144457	0.00263168	-0.167901
PIK3CG	1.63218	1.63218	up	-3.92828	3.99844	0.000144658	0.00263339	-0.169233
XXyac-YM21GA2.1	-2.524	2.524	down	-8.02537	-3.99708	0.000145344	0.00264341	-0.173757
RP11-387H17.4	-2.69055	2.69055	down	-4.34733	-3.99587	0.00014596	0.00265214	-0.1778
AL022341.3	-2.97831	2.97831	down	-4.51073	-3.99572	0.000146036	0.00265215	-0.1783
CTD-2552K11.2	2.13806	2.13806	up	-8.62809	3.99441	0.000146712	0.00266167	-0.182712
RBM24	1.73403	1.73403	up	-2.89312	3.9937	0.000147075	0.00266579	-0.185079
GPR55	2.25806	2.25806	up	-6.01401	3.9929	0.000147485	0.00267157	-0.187742
PTPRC	1.90254	1.90254	up	-1.37931	3.99258	0.00014765	0.00267372	-0.18881
CD300C	1.50085	1.50085	up	-2.16029	3.99211	0.000147893	0.00267647	-0.190384
ZNF781	-2.5156	2.5156	down	-1.34547	-3.98712	0.000150492	0.00271511	-0.207038
NTNG1	-1.57015	1.57015	down	-0.14179	-3.98657	0.000150782	0.00271783	-0.208879
THEMIS	2.49056	2.49056	up	-6.27249	3.98582	0.000151178	0.00272406	-0.211389
GRP	2.80062	2.80062	up	-7.18718	3.98574	0.00015122	0.00272406	-0.211654
ZDHHC11B	1.52446	1.52446	up	-0.117741	3.98152	0.000153462	0.00275935	-0.225724
NR5A2	1.85868	1.85868	up	-5.54651	3.98132	0.000153569	0.00276042	-0.226389
CTD-3035K23.7	2.23113	2.23113	up	-4.84863	3.9798	0.000154386	0.00277341	-0.231462
SLC6A1	1.60072	1.60072	up	-2.66774	3.97947	0.000154564	0.0027749	-0.232564
ADGRG5	1.74739	1.74739	up	-4.26547	3.9791	0.000154765	0.00277767	-0.23381
RP11-527H14.4	3.76581	3.76581	up	-3.77612	3.97847	0.000155106	0.00278122	-0.235909
SLC7A11	1.93407	1.93407	up	-5.35251	3.97808	0.000155315	0.00278412	-0.237198
AC008991.1	-1.81682	1.81682	down	-0.115744	-3.97777	0.000155485	0.00278631	-0.238242
AC007879.6	-2.08824	2.08824	down	-8.75639	-3.97626	0.000156306	0.00279846	-0.243278
AMER2	-2.16384	2.16384	down	-1.71878	-3.97504	0.000156971	0.00280865	-0.247336
RP11-181E10.3	1.87471	1.87471	up	-8.64772	3.97478	0.000157112	0.00281031	-0.248194
TWIST1	1.90629	1.90629	up	-2.17978	3.97274	0.000158234	0.00282866	-0.254999
RP11-290L1.3	-4.83921	4.83921	down	-1.78825	-3.9722	0.00015853	0.00283308	-0.256782
KCNA5	-1.51402	1.51402	down	-0.245842	-3.97122	0.000159071	0.00284093	-0.260041
LRRIQ4	-2.03427	2.03427	down	-7.29	-3.96848	0.0001606	0.00286308	-0.269181
ULBP2	2.11903	2.11903	up	-3.25201	3.96821	0.000160751	0.00286491	-0.27008
REG3G	2.74496	2.74496	up	-7.30598	3.96767	0.000161049	0.00286848	-0.271853
RP13-516M14.2	-1.68293	1.68293	down	-4.94493	-3.96378	0.000163249	0.0029006	-0.284816
NLRP9	-2.29728	2.29728	down	-7.11331	-3.96143	0.00016459	0.00292177	-0.292634
UNC93B3	-2.73351	2.73351	down	-6.12579	-3.96124	0.000164697	0.00292279	-0.293257
ADAMTS7P4	2.64087	2.64087	up	-7.76424	3.95989	0.000165474	0.00293391	-0.297753
OOSP1	2.01736	2.01736	up	-8.25376	3.95786	0.000166642	0.00294837	-0.304474
SUCNR1	2.24794	2.24794	up	-4.90552	3.95169	0.000170254	0.0030041	-0.324959
ADAM33	1.76976	1.76976	up	0.194867	3.94796	0.000172472	0.00304142	-0.337328
RP11-80H5.5	-2.57257	2.57257	down	-2.58894	-3.94545	0.000173986	0.00306443	-0.345678
UBXN7-AS1	-2.75659	2.75659	down	-7.69782	-3.94393	0.000174904	0.0030769	-0.350703
CCL4L2	2.06815	2.06815	up	-0.7346	3.94338	0.000175236	0.00308099	-0.352513
GATA3	1.50678	1.50678	up	-3.08338	3.94117	0.00017659	0.00310003	-0.359863
LINC01281	1.63709	1.63709	up	-9.15761	3.93989	0.000177373	0.00311285	-0.364089
LRRIQ1	-2.49425	2.49425	down	-6.15189	-3.93934	0.00017771	0.0031169	-0.365904
TLR7	1.51304	1.51304	up	-2.8626	3.93657	0.000179429	0.0031461	-0.375095
CTD-3064M3.7	2.64961	2.64961	up	-4.72025	3.93593	0.000179824	0.00315208	-0.377194
CTD-2083E4.7	2.36457	2.36457	up	-1.89552	3.93562	0.000180017	0.00315453	-0.378222
RP11-53I6.3	-2.89004	2.89004	down	-6.68469	-3.93517	0.0001803	0.00315536	-0.379721
RP11-44D19.1	-2.84528	2.84528	down	-5.45199	-3.93057	0.000183195	0.00319968	-0.39493
CALCA	2.21955	2.21955	up	-8.57452	3.92707	0.000185428	0.0032327	-0.4065
TIMP4	1.57683	1.57683	up	-2.62055	3.927	0.000185472	0.0032327	-0.406725
RP11-214O1.2	2.05368	2.05368	up	-5.48513	3.92679	0.000185609	0.00323385	-0.407432
HLA-DQB2	2.26753	2.26753	up	-0.96679	3.92595	0.000186147	0.00324072	-0.410194
LINC00463	-2.48364	2.48364	down	-5.73766	-3.92433	0.000187199	0.00325506	-0.415573
GPR12	2.12915	2.12915	up	-8.25645	3.92415	0.000187312	0.00325606	-0.416151
CTD-3193K9.11	-2.8532	2.8532	down	-4.23428	-3.92353	0.000187711	0.00326107	-0.418184
RP11-141O11.2	-2.66833	2.66833	down	-6.0309	-3.92048	0.000189706	0.00328828	-0.428277
WASIR2	-2.3174	2.3174	down	-5.51673	-3.92027	0.000189846	0.0032884	-0.428978
RP11-392A14.9	1.62217	1.62217	up	-8.83079	3.92012	0.000189942	0.00328909	-0.429463
C5orf58	2.85354	2.85354	up	-7.42877	3.91912	0.000190601	0.00329856	-0.432769
PRR16	1.81154	1.81154	up	-3.42433	3.91846	0.000191038	0.00330513	-0.434952
DLL3	-2.09815	2.09815	down	0.531922	-3.91406	0.00019396	0.00334483	-0.449445
RP11-556E13.1	2.44911	2.44911	up	-8.58689	3.9139	0.000194069	0.00334573	-0.449982
RP11-236B18.5	-3.72916	3.72916	down	-5.11418	-3.91344	0.000194378	0.00335006	-0.451497
LILRA4	2.49068	2.49068	up	-2.5752	3.91256	0.00019497	0.00335927	-0.454399
IL1RN	1.68183	1.68183	up	-2.96742	3.91244	0.000195051	0.00335968	-0.454796
ADGRE4P	2.36599	2.36599	up	-6.72655	3.90905	0.000197348	0.0033884	-0.465968
RP11-18B16.2	2.57993	2.57993	up	-3.43111	3.90887	0.00019747	0.0033884	-0.466561
AP1S3	1.64412	1.64412	up	-0.143905	3.90868	0.000197603	0.00338968	-0.4672
ATP1A2	1.61376	1.61376	up	-1.55423	3.90771	0.000198262	0.00339785	-0.470381
APOC2	2.77206	2.77206	up	-1.49535	3.90539	0.000199859	0.00341937	-0.478034
XCL2	2.79924	2.79924	up	-3.3321	3.90295	0.000201548	0.00344627	-0.486068
NAPSB	1.59412	1.59412	up	-0.199301	3.90232	0.000201985	0.00345171	-0.48813
RP11-432J24.5	2.39632	2.39632	up	-2.14099	3.89883	0.000204428	0.0034881	-0.499602
CTB-58E17.3	-2.15425	2.15425	down	-2.25442	-3.89587	0.000206527	0.00351805	-0.509349
PTPN22	2.17627	2.17627	up	-4.40024	3.89551	0.000206782	0.00352137	-0.510527
RP11-350G8.9	2.62195	2.62195	up	-7.46587	3.89524	0.000206971	0.00352355	-0.511396
EPHA5	2.32532	2.32532	up	-3.10613	3.89323	0.000208415	0.003543	-0.518033
TM4SF19	2.83702	2.83702	up	-4.08633	3.89033	0.000210505	0.00357231	-0.527549
PHOSPHO1	2.23572	2.23572	up	-4.80735	3.88798	0.000212214	0.00359922	-0.535261
LINC00315	-1.71067	1.71067	down	-5.46563	-3.88652	0.000213283	0.00361526	-0.540054
LL09NC01-251B2.3	-2.11338	2.11338	down	-3.21595	-3.88459	0.000214702	0.00363511	-0.54638
AC016757.3	-1.68942	1.68942	down	0.745389	-3.88448	0.000214785	0.00363528	-0.546748
AC024937.4	-2.6986	2.6986	down	-6.77141	-3.88394	0.000215181	0.003639	-0.548502
RP11-15J10.1	3.73785	3.73785	up	-2.63563	3.88327	0.000215684	0.00364646	-0.55073
C19orf35	1.72734	1.72734	up	-4.33897	3.88034	0.000217862	0.00367798	-0.560313
RP11-474I16.8	-2.38771	2.38771	down	-4.60137	-3.87833	0.000219374	0.0037003	-0.566906
LINC00520	3.84667	3.84667	up	-4.94662	3.87442	0.000222343	0.00374391	-0.579725
CREB3L3	1.53971	1.53971	up	-9.0094	3.87334	0.000223172	0.00375571	-0.583273
RP11-778D9.13	-2.54495	2.54495	down	-5.36688	-3.87067	0.00022522	0.00378582	-0.591982
IPCEF1	1.94263	1.94263	up	-5.09456	3.86864	0.000226797	0.00380688	-0.598638
CTD-2195M15.1	-3.45181	3.45181	down	-6.5755	-3.86662	0.000228372	0.00382673	-0.605234
CTC-459M5.2	-2.50045	2.50045	down	-8.06618	-3.86476	0.000229834	0.00384793	-0.611318
EMCN	-1.53202	1.53202	down	3.89295	-3.86247	0.000231646	0.00386988	-0.618801
EMBP1	2.10166	2.10166	up	-6.29537	3.86244	0.000231673	0.00386988	-0.618916
LINC01033	1.80353	1.80353	up	-9.07545	3.85918	0.000234274	0.00390552	-0.629556
PPARG	-1.59188	1.59188	down	1.69209	-3.85676	0.00023623	0.00393478	-0.637482
SRRM4	2.23013	2.23013	up	-7.24439	3.8547	0.000237902	0.00395925	-0.644203
PTPRO	1.88729	1.88729	up	-3.43489	3.85416	0.000238341	0.00396429	-0.645957
LINC00943	1.84571	1.84571	up	-8.64799	3.85364	0.000238764	0.00396908	-0.647648
CCDC173	-2.06748	2.06748	down	-6.61536	-3.85094	0.000240985	0.00400487	-0.656473
FXYD3	-2.05216	2.05216	down	-0.189685	-3.85015	0.000241636	0.00401454	-0.659042
GFRA3	-2.17081	2.17081	down	-3.06046	-3.84974	0.000241977	0.00401793	-0.660387
VN2R19P	-2.0879	2.0879	down	-8.10097	-3.84608	0.000245026	0.00405706	-0.672319
RP11-101O6.2	2.39663	2.39663	up	-6.0871	3.84561	0.000245418	0.0040601	-0.673839
MICALCL	1.73929	1.73929	up	-8.18699	3.84539	0.000245605	0.00406206	-0.674568
RP11-367G6.3	2.2539	2.2539	up	-8.21543	3.84281	0.000247776	0.00409565	-0.682951
RPS27AP2	-2.62811	2.62811	down	-7.1521	-3.84203	0.000248436	0.0041054	-0.685487
KB-1742H10.3	2.10812	2.10812	up	-4.45182	3.83837	0.000251565	0.00414774	-0.697407
NCAM1	1.76955	1.76955	up	-1.5074	3.83819	0.000251725	0.00414805	-0.698015
DTHD1	2.40584	2.40584	up	-7.2019	3.83584	0.000253747	0.00417902	-0.705636
AC078883.3	2.87589	2.87589	up	-5.86839	3.83438	0.000255021	0.00419079	-0.710407
LINC01460	-1.82702	1.82702	down	-5.16471	-3.83436	0.000255035	0.00419079	-0.710456
HCG15	-1.79461	1.79461	down	-3.05495	-3.83342	0.000255857	0.00420195	-0.713522
RP11-373N22.3	-1.61456	1.61456	down	-5.34998	-3.8298	0.000259033	0.00424816	-0.725274
FAIM2	1.98875	1.98875	up	-1.69978	3.82923	0.000259538	0.00425406	-0.727128
RP11-507K2.3	-2.0908	2.0908	down	-2.73534	-3.82619	0.000262249	0.00429369	-0.737025
RP11-71E19.1	-1.66459	1.66459	down	-1.61931	-3.82487	0.000263429	0.0043085	-0.741297
RP11-893F2.13	-2.36296	2.36296	down	-3.17026	-3.82485	0.000263448	0.0043085	-0.741367
CXCR6	2.45437	2.45437	up	-3.00723	3.82331	0.000264832	0.0043263	-0.746356
RP5-1049N15.2	-1.87648	1.87648	down	-8.12085	-3.82163	0.000266358	0.00434639	-0.751829
AF165138.7	2.12747	2.12747	up	-8.54217	3.8215	0.000266476	0.00434663	-0.752249
SPATA31A3	-2.28502	2.28502	down	-8.01217	-3.82122	0.000266723	0.0043487	-0.753131
ZNF536	2.2652	2.2652	up	-4.39544	3.82026	0.000267598	0.00436055	-0.756251
LAMP3	1.72471	1.72471	up	-4.21148	3.81858	0.00026914	0.0043808	-0.761721
SEMA3E	2.35938	2.35938	up	-4.18242	3.81752	0.000270106	0.00439165	-0.765133
RSPH14	2.18934	2.18934	up	-3.68349	3.81605	0.000271465	0.0044071	-0.769911
PVRIG	2.44342	2.44342	up	-2.58298	3.81552	0.000271951	0.00441307	-0.771613
RUFY4	2.48353	2.48353	up	-6.44044	3.81392	0.000273438	0.00443229	-0.776805
RPL4P1	1.98007	1.98007	up	-8.65019	3.81356	0.000273774	0.00443528	-0.777973
ZIM2	-2.43405	2.43405	down	-6.76903	-3.81216	0.000275086	0.00445283	-0.782523
LBX1	1.81158	1.81158	up	-8.41944	3.81056	0.000276586	0.00447094	-0.787702
RP11-48G14.3	-2.64268	2.64268	down	-6.22304	-3.80858	0.000278455	0.00449743	-0.794111
TLR8	1.89664	1.89664	up	-4.59311	3.80595	0.000280951	0.00453025	-0.802605
RP11-264J4.8	2.0475	2.0475	up	-7.53721	3.8052	0.000281671	0.00453936	-0.805041
VCAN	1.61213	1.61213	up	-1.70437	3.80281	0.000283966	0.0045688	-0.812762
RP3-441A12.1	-2.91615	2.91615	down	-5.62612	-3.80217	0.000284591	0.00457634	-0.814855
AC034228.3	2.67361	2.67361	up	-4.93854	3.80175	0.000284995	0.00458159	-0.816207
CPB2-AS1	-2.27746	2.27746	down	-2.54898	-3.80014	0.00028656	0.00460169	-0.821416
RGL4	2.04388	2.04388	up	-3.77491	3.79773	0.000288912	0.00463463	-0.829196
AQP12B	1.95084	1.95084	up	-7.41495	3.7963	0.00029032	0.00464808	-0.833823
HTR3B	-2.3463	2.3463	down	-5.70403	-3.7963	0.000290322	0.00464808	-0.833827
LINC01164	-1.97033	1.97033	down	-8.72177	-3.79598	0.000290637	0.00465059	-0.83486
TRAV3	2.98901	2.98901	up	-7.48562	3.79224	0.00029435	0.00470486	-0.846939
TRIM51	2.17816	2.17816	up	-3.10449	3.79142	0.000295164	0.00471402	-0.849567
FCRL3	2.75183	2.75183	up	-5.99444	3.78988	0.000296708	0.00473351	-0.85453
AC002454.1	-2.8034	2.8034	down	-3.78886	-3.78952	0.000297073	0.00473805	-0.8557
PRRT3-AS1	-1.7217	1.7217	down	0.608029	-3.78508	0.000301579	0.00480076	-0.870019
RP11-383J24.1	2.24455	2.24455	up	-8.56765	3.78413	0.000302555	0.00481499	-0.873093
LINC01140	2.18572	2.18572	up	-3.95749	3.78399	0.000302698	0.00481596	-0.873543
SOSTDC1	-3.00336	3.00336	down	-2.52058	-3.78262	0.000304103	0.00483306	-0.877947
LINC01336	2.09358	2.09358	up	-8.64218	3.78137	0.000305392	0.00484961	-0.881972
CTB-178M22.2	-2.17769	2.17769	down	-2.45722	-3.78064	0.000306153	0.00485904	-0.884336
RP5-1091N2.9	2.68296	2.68296	up	-5.74296	3.77955	0.000307279	0.00487296	-0.887829
LAX1	2.23428	2.23428	up	-5.61965	3.77877	0.000308097	0.00488064	-0.890357
ELFN1-AS1	3.43317	3.43317	up	-0.502096	3.77751	0.000309408	0.00489753	-0.894396
HOXA13	2.44542	2.44542	up	-6.71965	3.77724	0.000309693	0.00490016	-0.895271
RP11-98D18.9	-1.93261	1.93261	down	-3.33574	-3.777	0.000309944	0.00490064	-0.896044
IGHV1OR15-1	2.89546	2.89546	up	-6.69456	3.7768	0.000310158	0.00490136	-0.896697
RP11-294C11.4	2.89546	2.89546	up	-6.69456	3.7768	0.000310158	0.00490136	-0.896697
E2F8	1.55361	1.55361	up	-3.60613	3.77594	0.000311065	0.00491172	-0.899475
ABHD17AP6	2.09895	2.09895	up	-7.02981	3.77492	0.000312135	0.00492597	-0.902742
MDFI	1.63645	1.63645	up	1.32122	3.77337	0.000313774	0.0049465	-0.907721
UBE2E1-AS1	-2.3528	2.3528	down	-5.61842	-3.77264	0.00031455	0.00495606	-0.91007
NCR3LG1	1.52875	1.52875	up	-2.1373	3.77105	0.000316245	0.00497876	-0.915182
C21orf62-AS1	-1.50315	1.50315	down	-1.67826	-3.77092	0.000316389	0.00497969	-0.915614
DMRT2	-2.79224	2.79224	down	-2.12665	-3.77081	0.000316505	0.00498017	-0.915962
TRAV20	2.4974	2.4974	up	-8.07391	3.77062	0.000316707	0.00498068	-0.91657
RP1-59D14.5	1.81362	1.81362	up	-0.495504	3.76969	0.000317709	0.00499509	-0.919571
AC068499.10	-2.24524	2.24524	down	-0.635609	-3.76912	0.000318315	0.00500328	-0.921384
HS6ST3	1.80822	1.80822	up	-6.22695	3.76556	0.000322169	0.00506022	-0.932827
RP11-46H11.3	-1.60373	1.60373	down	-4.20357	-3.76554	0.000322197	0.00506022	-0.932909
FRMD5	2.26308	2.26308	up	-4.73153	3.7653	0.00032245	0.00506249	-0.933656
CNTF	2.03999	2.03999	up	-1.97182	3.76346	0.000324467	0.00508768	-0.939582
RP1-40G4P.1	-2.27102	2.27102	down	-4.23295	-3.7632	0.000324749	0.00509075	-0.94041
CDC20P1	-1.82226	1.82226	down	-4.08113	-3.76084	0.000327345	0.00512733	-0.947978
FUT7	2.1247	2.1247	up	-6.28919	3.76067	0.000327536	0.00512894	-0.948531
RP1-278O22.1	2.33856	2.33856	up	-1.72933	3.7596	0.000328718	0.00514471	-0.951958
RPL15P20	-1.66401	1.66401	down	-9.12326	-3.75948	0.000328854	0.00514546	-0.95235
AC005786.7	5.5077	5.5077	up	-1.00122	3.75874	0.000329677	0.0051542	-0.954725
NKX3-2	1.87977	1.87977	up	-7.06425	3.75522	0.00033362	0.0052103	-0.966028
RP11-369K16.1	-2.22506	2.22506	down	-5.53644	-3.75509	0.000333762	0.00521112	-0.966431
LINC00456	-2.27592	2.27592	down	-7.73748	-3.75482	0.000334065	0.00521445	-0.967292
ATP4B	-2.25574	2.25574	down	-4.64352	-3.75113	0.000338248	0.00526992	-0.979118
RP11-15I11.3	3.47401	3.47401	up	-4.15626	3.74829	0.000341497	0.00531348	-0.988205
OIT3	1.6482	1.6482	up	-5.01115	3.74756	0.000342342	0.00532521	-0.990552
U91328.21	3.20248	3.20248	up	-3.30998	3.7471	0.000342877	0.00532788	-0.992037
RP11-115D19.3	-1.97281	1.97281	down	-8.80922	-3.74571	0.000344488	0.00534714	-0.99649
TRBV3-1	3.29235	3.29235	up	-6.69584	3.74462	0.000345745	0.00536107	-0.999952
RP11-299H22.3	1.64743	1.64743	up	-9.06603	3.74282	0.000347857	0.00538833	-1.00574
TRAF3IP3	1.89604	1.89604	up	-1.53677	3.74227	0.000348502	0.00539523	-1.0075
CTD-2576D5.4	2.27796	2.27796	up	-8.13783	3.74096	0.000350031	0.00541462	-1.01166
CTD-2028E8.2	2.44216	2.44216	up	-5.97367	3.74086	0.000350159	0.00541518	-1.01201
RP11-193M21.1	-2.4858	2.4858	down	-7.32692	-3.74039	0.000350713	0.00541944	-1.0135
ZNF350-AS1	-3.07373	3.07373	down	-2.78002	-3.74017	0.000350967	0.00541994	-1.01419
RP11-440I14.2	-1.69187	1.69187	down	-8.64172	-3.73924	0.000352067	0.00543464	-1.01717
EXPH5	-1.72654	1.72654	down	-5.99955	-3.73842	0.000353039	0.00544442	-1.01979
KIAA0319	1.86807	1.86807	up	-6.88496	3.73839	0.000353073	0.00544442	-1.01988
SHH	1.61956	1.61956	up	-8.82033	3.73459	0.000357612	0.00551007	-1.03201
SYT2	2.03178	2.03178	up	-7.36889	3.73296	0.000359586	0.00553757	-1.03724
TPD52	1.59615	1.59615	up	1.44898	3.7317	0.000361113	0.00555379	-1.04127
TRBV9	3.55711	3.55711	up	-5.74356	3.73032	0.000362784	0.00557656	-1.04565
TRHDE-AS1	2.15996	2.15996	up	-6.78837	3.72982	0.000363396	0.0055845	-1.04725
RP11-620J15.2	-1.95282	1.95282	down	-5.09315	-3.7286	0.00036489	0.00560451	-1.05115
PCDHAC1	-2.2734	2.2734	down	-5.67727	-3.72737	0.000366398	0.00562473	-1.05506
RP5-1070G24.2	-3.09918	3.09918	down	-1.97184	-3.72709	0.000366743	0.00562855	-1.05596
RP11-8L8.2	2.19304	2.19304	up	-6.16556	3.7267	0.000367226	0.00563301	-1.05721
CTD-2240J17.4	-2.20438	2.20438	down	-8.11971	-3.72646	0.000367528	0.00563617	-1.05799
IFI16	1.64226	1.64226	up	3.96896	3.72564	0.000368531	0.00564564	-1.06058
RP11-10J5.1	2.01947	2.01947	up	-8.68116	3.72524	0.000369025	0.00564878	-1.06185
ERICH1-AS1	-2.30789	2.30789	down	-7.33023	-3.72477	0.000369615	0.00565485	-1.06337
FAM81B	2.16995	2.16995	up	-8.2116	3.72427	0.000370236	0.00566139	-1.06496
RP11-515O17.2	-1.55458	1.55458	down	-8.63864	-3.72186	0.000373239	0.00570583	-1.07263
HS3ST1	1.58712	1.58712	up	-3.86775	3.72174	0.000373395	0.00570671	-1.07303
CHST9	1.85511	1.85511	up	-0.814039	3.71756	0.000378666	0.00576771	-1.08634
RP11-489O18.1	2.81796	2.81796	up	-5.40228	3.7173	0.000378998	0.00576977	-1.08717
BTLA	2.51051	2.51051	up	-6.38352	3.7151	0.000381803	0.00580192	-1.09417
RP11-126O1.5	-2.17333	2.17333	down	-5.93251	-3.71091	0.000387202	0.00586954	-1.1075
XIRP2-AS1	-1.83089	1.83089	down	-8.79911	-3.71017	0.000388155	0.00587862	-1.10983
WI2-2118C23.2	-2.65901	2.65901	down	-7.86363	-3.70963	0.000388856	0.0058862	-1.11155
AZGP1P1	-1.88559	1.88559	down	-8.57266	-3.70907	0.000389588	0.00589271	-1.11333
RP11-520P18.5	2.5633	2.5633	up	-8.06475	3.70418	0.000396018	0.00597761	-1.12887
DRD1	2.10447	2.10447	up	-7.77287	3.70287	0.000397766	0.0060009	-1.13305
HLA-DPB2	2.41767	2.41767	up	-3.14303	3.70203	0.000398875	0.00601454	-1.13569
TRAV19	3.42741	3.42741	up	-6.5009	3.6991	0.000402813	0.00606456	-1.14501
HS3ST5	-2.12876	2.12876	down	-5.96631	-3.69791	0.000404412	0.00608394	-1.14877
RP11-304M2.3	-2.70383	2.70383	down	-7.19988	-3.69262	0.000411626	0.00617849	-1.16555
CABP4	2.17822	2.17822	up	-4.76267	3.69253	0.000411752	0.00617849	-1.16584
TRAT1	2.61193	2.61193	up	-6.16418	3.69056	0.000414471	0.00621452	-1.17208
CELA1	1.51878	1.51878	up	-9.10621	3.6884	0.000417467	0.00625144	-1.17892
AC073316.1	-2.06497	2.06497	down	-7.77437	-3.68753	0.000418679	0.00626479	-1.18167
XAF1	2.39122	2.39122	up	-0.291419	3.68716	0.000419202	0.00627101	-1.18285
IL1RAPL1	-1.9119	1.9119	down	-7.35862	-3.68703	0.000419378	0.00627204	-1.18325
RFPL2	2.20205	2.20205	up	-3.40942	3.68549	0.000421543	0.00629799	-1.18813
AC104820.2	2.39332	2.39332	up	-8.1006	3.68391	0.000423771	0.00631999	-1.19313
RP11-345P4.10	3.40121	3.40121	up	-5.99323	3.68251	0.000425757	0.00634637	-1.19757
TRBV14	2.81892	2.81892	up	-8.02718	3.68095	0.000427966	0.00637027	-1.20248
RP11-113E21.3	1.75916	1.75916	up	-8.19104	3.68061	0.000428462	0.00637535	-1.20357
LINC00989	1.74366	1.74366	up	-7.43473	3.68008	0.000429212	0.00638327	-1.20523
ZSCAN23	-2.48016	2.48016	down	-3.95592	-3.67989	0.00042948	0.00638562	-1.20582
LINC00939	-2.0223	2.0223	down	-6.70746	-3.67829	0.000431788	0.00641505	-1.21091
NRADDP	-2.24814	2.24814	down	-6.02743	-3.6782	0.000431906	0.00641518	-1.21117
ZNF728	-2.23704	2.23704	down	-7.23552	-3.6775	0.000432925	0.00642217	-1.2134
AKR1B10	2.20068	2.20068	up	-7.73918	3.67692	0.000433758	0.00642965	-1.21523
RP11-97O12.5	2.60758	2.60758	up	-1.94445	3.6749	0.000436681	0.00646153	-1.22159
RP11-297J22.1	2.39641	2.39641	up	-7.46136	3.67436	0.000437471	0.00647152	-1.22331
FOXE3	1.94447	1.94447	up	-6.90896	3.67429	0.000437577	0.00647152	-1.22354
CROCC2	1.90429	1.90429	up	-6.54654	3.67416	0.00043776	0.00647259	-1.22393
TPTE2	1.98727	1.98727	up	-5.67771	3.67189	0.00044108	0.00651347	-1.2311
RP11-762I7.5	3.00063	3.00063	up	-2.59853	3.67079	0.000442701	0.00653369	-1.23458
RP11-640L9.1	1.6368	1.6368	up	-8.90614	3.66744	0.000447666	0.00659907	-1.24515
TRAV1-1	2.36715	2.36715	up	-8.45121	3.66335	0.000453792	0.00668433	-1.25803
TRAV8-3	2.60335	2.60335	up	-8.15596	3.66065	0.000457882	0.0067368	-1.26654
PCDHA2	-2.29809	2.29809	down	-7.07951	-3.65626	0.000464607	0.00682134	-1.28036
RP11-170K4.2	-1.87344	1.87344	down	-7.44176	-3.65319	0.000469364	0.00687845	-1.29001
RP11-435O5.7	-2.41153	2.41153	down	-6.17825	-3.65196	0.000471293	0.00690048	-1.2939
DDX11L9	-2.43692	2.43692	down	-5.74591	-3.65121	0.000472469	0.00691251	-1.29626
LINC00643	1.68343	1.68343	up	-8.81459	3.65098	0.000472827	0.00691602	-1.29698
AC004878.2	2.08261	2.08261	up	-7.92667	3.64983	0.00047463	0.00694066	-1.30058
RP11-6I2.3	2.48698	2.48698	up	-5.22526	3.64743	0.000478417	0.00698784	-1.30811
LHFPL3	1.51654	1.51654	up	-0.380194	3.64651	0.00047988	0.00700695	-1.31101
RP3-527G5.1	-3.15471	3.15471	down	-4.17985	-3.64367	0.000484427	0.00706629	-1.31994
PRYP3	-2.02416	2.02416	down	-8.56388	-3.64304	0.000485436	0.00707748	-1.32191
TRBV6-1	2.92546	2.92546	up	-7.42359	3.6413	0.000488243	0.00711487	-1.32737
CDSN	-1.57113	1.57113	down	-8.88345	-3.64021	0.000490009	0.00713351	-1.33079
LINC00982	2.57449	2.57449	up	-3.57413	3.63851	0.000492778	0.00716847	-1.33613
LINC00486	-2.10976	2.10976	down	-8.17123	-3.63791	0.000493748	0.0071808	-1.338
CA2	1.72334	1.72334	up	-0.647476	3.63768	0.000494132	0.0071846	-1.33873
TRAV8-2	2.79766	2.79766	up	-7.22751	3.63686	0.000495464	0.00720218	-1.34128
TENM1	1.77519	1.77519	up	-8.12544	3.63649	0.000496087	0.00720765	-1.34247
THPO	1.88672	1.88672	up	-5.24106	3.63545	0.000497791	0.00722883	-1.34572
ZIC2	2.6203	2.6203	up	-6.65636	3.63381	0.000500493	0.00726207	-1.35085
RP11-348H3.2	2.55727	2.55727	up	-7.0815	3.62996	0.000506907	0.00734118	-1.3629
PCDHA7	-2.44678	2.44678	down	-6.47075	-3.62938	0.000507889	0.00734996	-1.36474
RP5-981L23.2	-2.33446	2.33446	down	-6.03169	-3.62805	0.00051012	0.00737678	-1.36889
RP11-283C24.2	1.85755	1.85755	up	-8.88608	3.62734	0.000511326	0.00738258	-1.37112
AC003092.1	1.78529	1.78529	up	-8.89143	3.62641	0.0005129	0.00740054	-1.37403
CH507-42P11.3	-1.78592	1.78592	down	-8.0363	-3.6262	0.000513251	0.00740379	-1.37468
KCND2	1.761	1.761	up	-8.64721	3.62584	0.000513864	0.00740897	-1.37581
RNF182	1.85877	1.85877	up	-5.10515	3.62546	0.000514515	0.00741653	-1.37701
ANO9	2.08871	2.08871	up	-0.0933924	3.62286	0.000518951	0.00747496	-1.38514
TRIM60P17	-1.98963	1.98963	down	-8.52596	-3.62268	0.000519258	0.00747498	-1.3857
NPAP1P7	-2.86397	2.86397	down	-7.27368	-3.62263	0.000519335	0.00747498	-1.38584
RP11-598F7.3	2.90805	2.90805	up	-6.7816	3.62055	0.00052292	0.0075155	-1.39235
TRBV6-6	3.04459	3.04459	up	-7.39759	3.61995	0.000523954	0.00752684	-1.39422
TRGV5	2.35945	2.35945	up	-5.99547	3.61984	0.000524136	0.00752744	-1.39455
RP1-302G2.5	1.97744	1.97744	up	-8.47372	3.61938	0.000524933	0.00753335	-1.39599
RP11-514O12.4	2.14841	2.14841	up	-2.91561	3.61574	0.000531282	0.00761141	-1.40737
OR2C3	-2.23697	2.23697	down	-7.35199	-3.61492	0.000532727	0.00762837	-1.40994
ULK4	1.55009	1.55009	up	1.42735	3.61354	0.000535155	0.00765939	-1.41424
RP11-484N16.1	2.16094	2.16094	up	-8.71573	3.6134	0.000535403	0.0076608	-1.41468
CTC-260E6.6	-2.18573	2.18573	down	-4.18687	-3.61333	0.000535515	0.0076608	-1.41488
RP11-103C16.2	-1.95198	1.95198	down	-8.69835	-3.61256	0.000536878	0.00767842	-1.41729
RN7SL526P	-3.09461	3.09461	down	-5.99242	-3.61088	0.000539857	0.00771351	-1.42253
CTD-2547L24.3	2.25877	2.25877	up	-5.80419	3.61057	0.000540423	0.00771939	-1.42352
RP11-429E11.2	1.9991	1.9991	up	3.34845	3.6105	0.000540533	0.00771939	-1.42371
KRT42P	-1.72635	1.72635	down	-8.68822	-3.60859	0.000543951	0.00775876	-1.42967
SLC12A3	1.86515	1.86515	up	-7.79313	3.60841	0.000544269	0.0077614	-1.43023
LEFTY2	3.0032	3.0032	up	-4.57683	3.60769	0.000545573	0.00777233	-1.43249
CNTN1	-1.78907	1.78907	down	-2.2237	-3.60656	0.000547606	0.0077957	-1.43601
OTOF	1.8001	1.8001	up	-5.70459	3.60646	0.000547788	0.0077964	-1.43633
AC007292.7	-2.73328	2.73328	down	-3.22263	-3.606	0.000548611	0.00780621	-1.43775
NAT8B	2.47397	2.47397	up	-6.14547	3.60194	0.000555993	0.00789782	-1.45039
CTD-2319I12.2	-1.91139	1.91139	down	-3.86065	-3.59886	0.000561666	0.00797068	-1.46
LAMP5	1.94289	1.94289	up	-3.3153	3.59865	0.000562046	0.00797413	-1.46064
LLNLR-285B5.1	-1.94219	1.94219	down	-8.53283	-3.59834	0.000562626	0.00798043	-1.46161
NR0B1	2.06789	2.06789	up	-7.31814	3.59761	0.000563981	0.0079954	-1.46389
KCNV2	2.20097	2.20097	up	-3.40729	3.5974	0.000564364	0.0079954	-1.46453
CTD-3064H18.4	-2.08176	2.08176	down	-2.96429	-3.5971	0.000564919	0.00800022	-1.46546
FAM24B	-1.741	1.741	down	-0.875185	-3.59666	0.000565729	0.00800893	-1.46682
PRDM12	1.83952	1.83952	up	-7.51337	3.59497	0.000568887	0.00804781	-1.47208
CD48	1.75184	1.75184	up	0.701959	3.59298	0.000572631	0.0080871	-1.47829
GREM1	2.13345	2.13345	up	-6.01752	3.59172	0.000575002	0.00811855	-1.4822
L3MBTL4-AS1	1.83093	1.83093	up	-3.25115	3.59082	0.000576691	0.00813267	-1.48497
MAPK10	1.51172	1.51172	up	-1.43099	3.58946	0.000579289	0.00816539	-1.48922
RP11-519G16.3	-1.94213	1.94213	down	-8.22716	-3.58919	0.000579802	0.00817064	-1.49006
RP11-65J21.3	2.71353	2.71353	up	-3.77282	3.58842	0.00058127	0.0081874	-1.49245
AC241585.2	1.52921	1.52921	up	0.549234	3.58762	0.000582802	0.00820502	-1.49494
RP11-381O7.3	1.85254	1.85254	up	-7.80433	3.58714	0.000583705	0.00821577	-1.4964
HRH4	1.77761	1.77761	up	-7.45079	3.58673	0.000584489	0.00822483	-1.49767
CTD-2529P6.4	-2.51619	2.51619	down	-6.70611	-3.58513	0.000587566	0.00826019	-1.50264
RP11-343D24.2	-3.16761	3.16761	down	-5.77365	-3.5848	0.000588217	0.00826538	-1.50369
GPR37L1	2.01823	2.01823	up	-5.32349	3.58358	0.000590568	0.00828846	-1.50746
CALCR	1.93868	1.93868	up	-6.99589	3.58344	0.000590852	0.00829046	-1.50791
AC092652.1	-3.8508	3.8508	down	-4.44419	-3.58122	0.000595151	0.00833682	-1.51477
RP11-563N12.2	-2.30158	2.30158	down	-8.06431	-3.57691	0.000603637	0.0084261	-1.52815
U82695.9	-2.33732	2.33732	down	-3.14095	-3.57685	0.000603755	0.0084261	-1.52834
ARHGAP31-AS1	-2.36791	2.36791	down	-5.48353	-3.57517	0.000607089	0.00845752	-1.53354
ATAD3C	-1.73686	1.73686	down	0.987951	-3.57438	0.000608661	0.00846936	-1.53599
BX470102.3	2.66029	2.66029	up	-6.86495	3.57375	0.000609918	0.00848281	-1.53794
GABRP	-1.54544	1.54544	down	-1.99757	-3.57319	0.000611024	0.00849416	-1.53965
IRF6	-1.68482	1.68482	down	-1.61399	-3.57269	0.000612036	0.0085042	-1.54122
CIDEC	-1.78062	1.78062	down	-4.18851	-3.57253	0.000612345	0.00850647	-1.54169
GALNT13	2.322	2.322	up	-6.34139	3.57195	0.000613525	0.0085166	-1.54351
AC004988.1	2.06106	2.06106	up	-6.05121	3.57044	0.000616549	0.00854948	-1.54816
CTD-2201I18.1	2.2741	2.2741	up	-6.51575	3.57041	0.000616608	0.00854948	-1.54825
RP11-450H6.3	1.86402	1.86402	up	-7.89793	3.56744	0.000622643	0.0086087	-1.55746
RP11-1094M14.8	2.71223	2.71223	up	-5.18765	3.56162	0.00063461	0.00874731	-1.57545
LINC01234	-1.9042	1.9042	down	-1.23133	-3.55929	0.000639449	0.00880666	-1.58262
CTA-246H3.11	-1.75311	1.75311	down	-0.540518	-3.55048	0.000658121	0.00903313	-1.60982
AC007879.2	2.4016	2.4016	up	-6.85486	3.54995	0.000659255	0.00904204	-1.61144
SPIC	1.9434	1.9434	up	-8.51466	3.54928	0.000660704	0.00904966	-1.61352
LINC00240	-1.61029	1.61029	down	-0.789689	-3.54921	0.000660838	0.00904966	-1.61371
AC069363.1	2.75701	2.75701	up	-5.95989	3.54858	0.000662217	0.00906174	-1.61568
ZSCAN5B	-1.83175	1.83175	down	-6.70105	-3.54792	0.000663645	0.00907704	-1.61771
AC010731.4	1.927	1.927	up	-8.78083	3.54639	0.000666954	0.00910955	-1.62241
GCK	2.01042	2.01042	up	-4.22264	3.54559	0.000668692	0.0091269	-1.62487
PCSK1	2.05844	2.05844	up	-2.37927	3.54489	0.000670215	0.00914342	-1.62701
LMOD3	1.67514	1.67514	up	-7.0114	3.54352	0.000673217	0.0091801	-1.63124
AC022182.1	1.63677	1.63677	up	-9.00403	3.54268	0.000675068	0.0092032	-1.63383
GS1-174L6.4	-2.49173	2.49173	down	-8.18501	-3.542	0.000676559	0.00922138	-1.63591
LRRC66	1.94376	1.94376	up	-6.87667	3.5413	0.000678102	0.00924026	-1.63806
MYL12BP2	1.9535	1.9535	up	-8.71779	3.54104	0.000678688	0.00924445	-1.63888
CTD-2292P10.4	1.51108	1.51108	up	-3.2229	3.54088	0.00067904	0.00924445	-1.63937
KCNQ5-IT1	-2.59322	2.59322	down	-5.62128	-3.53897	0.000683275	0.0092913	-1.64524
C1orf210	-2.0329	2.0329	down	-6.86139	-3.53774	0.000686023	0.00932434	-1.64903
CACNB4	2.01063	2.01063	up	-5.79266	3.53753	0.000686492	0.00932639	-1.64968
DPP10-AS1	-2.86511	2.86511	down	-5.37415	-3.53647	0.000688864	0.00935427	-1.65293
MIAT	1.85224	1.85224	up	-4.53826	3.53307	0.000696515	0.00944066	-1.66336
RP11-173C1.1	2.4306	2.4306	up	-3.03639	3.53246	0.000697913	0.00944929	-1.66525
ADGRL3	2.01349	2.01349	up	-6.21198	3.53123	0.000700696	0.0094776	-1.66901
RP11-356B19.11	-1.53569	1.53569	down	-1.43668	-3.53094	0.000701354	0.00948211	-1.6699
CD109	1.56234	1.56234	up	-1.16681	3.5301	0.000703291	0.00950611	-1.6725
IL15	1.59751	1.59751	up	-2.72872	3.52928	0.000705155	0.00952472	-1.675
CH507-24F1.1	-2.4477	2.4477	down	-4.15194	-3.52889	0.000706052	0.00953464	-1.6762
CD1A	1.59325	1.59325	up	-8.63868	3.5268	0.000710865	0.00958637	-1.68261
CYP39A1	-1.89461	1.89461	down	-3.24479	-3.52627	0.000712094	0.00959596	-1.68424
CTD-2240J17.1	-1.53346	1.53346	down	-9.18937	-3.52623	0.000712189	0.00959596	-1.68437
AC128709.4	-2.41857	2.41857	down	-7.11929	-3.52621	0.000712221	0.00959596	-1.68441
MTUS2-AS1	1.68481	1.68481	up	-7.58474	3.52356	0.000718381	0.00966151	-1.69254
HLA-J	1.69023	1.69023	up	-2.28317	3.52309	0.000719474	0.00967352	-1.69397
ZIC5	1.73169	1.73169	up	-8.54455	3.52227	0.00072141	0.00968865	-1.69651
CYP24A1	2.50001	2.50001	up	-4.24157	3.5187	0.000729808	0.00979223	-1.70743
LINC00475	2.23961	2.23961	up	-3.93771	3.51828	0.000730808	0.0098034	-1.70872
RP6-65G23.3	-1.90536	1.90536	down	-1.63373	-3.5171	0.000733605	0.00983191	-1.71233
AP000295.10	2.48266	2.48266	up	-5.85014	3.5164	0.000735272	0.009852	-1.71447
CBLN2	2.23605	2.23605	up	-6.5017	3.51516	0.000738226	0.00988707	-1.71825
KLHL30-AS1	1.55119	1.55119	up	-3.74188	3.51185	0.000746212	0.00997727	-1.7284
RP11-302B13.5	2.15657	2.15657	up	-3.02194	3.51172	0.000746525	0.00997768	-1.7288
SMIM2	2.72907	2.72907	up	-7.56417	3.51098	0.000748302	0.00999232	-1.73104
RP11-350G8.3	-2.14957	2.14957	down	-5.29552	-3.51069	0.000749023	0.00999626	-1.73195
RP4-742C19.12	2.62734	2.62734	up	-7.60599	3.51058	0.00074928	0.00999626	-1.73227
RP11-739L10.1	2.16069	2.16069	up	-4.16065	3.50936	0.000752237	0.0100334	-1.73599
CLEC9A	2.24025	2.24025	up	-5.17567	3.50898	0.000753176	0.0100414	-1.73717
CTB-109A12.1	1.73595	1.73595	up	-8.61569	3.50495	0.000763059	0.0101504	-1.74946
EXOC3L4	2.29849	2.29849	up	-4.55241	3.50426	0.000764762	0.0101661	-1.75156
KRT18P34	-1.94232	1.94232	down	-4.87095	-3.50112	0.00077258	0.0102581	-1.76116
TRGV3	2.73959	2.73959	up	-6.82596	3.49968	0.000776188	0.0102896	-1.76555
MUC7	-2.98998	2.98998	down	-2.96137	-3.49688	0.000783252	0.0103692	-1.77409
CHAD	-1.90258	1.90258	down	-4.2357	-3.49458	0.000789081	0.0104416	-1.78109
MT3	2.71771	2.71771	up	-2.38839	3.49421	0.000790038	0.0104519	-1.78223
LCN6	2.28483	2.28483	up	-6.88364	3.48982	0.000801326	0.0105798	-1.7956
SYNPO2L	2.05293	2.05293	up	-6.18837	3.48863	0.000804395	0.0106155	-1.79921
RP4-536B24.4	1.58147	1.58147	up	-9.06122	3.48736	0.00080771	0.0106497	-1.80308
CAPN13	2.10558	2.10558	up	-6.89017	3.48537	0.000812907	0.0107085	-1.80913
RP11-982M15.7	2.34606	2.34606	up	-7.55943	3.48458	0.000814995	0.0107264	-1.81155
C9orf171	-2.30804	2.30804	down	-5.68551	-3.48342	0.000818031	0.0107543	-1.81505
RP11-509J21.4	1.66969	1.66969	up	-8.87364	3.4828	0.000819665	0.0107709	-1.81693
C10orf67	-1.87703	1.87703	down	-5.78391	-3.48214	0.000821415	0.0107881	-1.81894
PKIA	1.71332	1.71332	up	-1.93556	3.48212	0.000821488	0.0107881	-1.81903
RP3-370M22.8	1.76938	1.76938	up	-8.51127	3.48147	0.000823208	0.0108078	-1.821
AC140725.4	-2.58829	2.58829	down	-5.37194	-3.47977	0.00082773	0.0108623	-1.82616
RP11-834C11.7	2.61719	2.61719	up	-6.68466	3.47873	0.0008305	0.0108962	-1.82931
PCDHB8	-1.95984	1.95984	down	-5.06505	-3.4786	0.000830852	0.0108984	-1.82971
ANK1	1.56859	1.56859	up	-3.37632	3.47804	0.000832351	0.0109156	-1.83141
JAKMIP2	2.10515	2.10515	up	-5.78547	3.47569	0.000838681	0.0109789	-1.83855
NKX2-2	2.66398	2.66398	up	-6.82054	3.47527	0.000839818	0.0109865	-1.83982
CCL24	3.13927	3.13927	up	-4.84795	3.4746	0.000841618	0.0110051	-1.84184
GS1-600G8.5	2.07173	2.07173	up	-7.67619	3.47355	0.000844459	0.0110373	-1.84501
RP11-89K11.1	-1.58135	1.58135	down	0.610471	-3.47171	0.000849485	0.0110857	-1.8506
STYK1	1.7827	1.7827	up	-8.07146	3.47112	0.000851101	0.0111043	-1.8524
CHRNA6	2.14207	2.14207	up	-7.30977	3.46779	0.000860275	0.0111991	-1.8625
AC006033.22	2.44627	2.44627	up	-7.65162	3.46698	0.000862506	0.0112206	-1.86494
NGFR	1.79488	1.79488	up	-1.1859	3.46581	0.000865777	0.0112582	-1.8685
ACKR1	2.27823	2.27823	up	-2.41372	3.46377	0.000871474	0.011316	-1.87468
FCER2	1.8899	1.8899	up	-4.59646	3.46373	0.000871573	0.011316	-1.87478
LA16c-360A4.1	2.361	2.361	up	-5.19172	3.46315	0.000873196	0.0113345	-1.87654
HOTAIRM1	2.70073	2.70073	up	-4.25186	3.46233	0.0008755	0.0113594	-1.87902
HHATL-AS1	-2.25199	2.25199	down	-3.13703	-3.46216	0.000875985	0.0113632	-1.87954
AC079776.1	-2.25438	2.25438	down	-4.70435	-3.46167	0.000877362	0.0113735	-1.88102
RP3-477O4.14	2.61933	2.61933	up	-6.1763	3.46144	0.000878012	0.0113794	-1.88172
ART3	-1.99817	1.99817	down	-2.98289	-3.46106	0.00087909	0.0113908	-1.88287
GUCY2D	1.60587	1.60587	up	-2.37425	3.46079	0.000879846	0.0113977	-1.88368
PCSK2	1.75457	1.75457	up	-0.980561	3.45917	0.00088443	0.0114448	-1.88858
CXorf21	2.06489	2.06489	up	-4.61013	3.45901	0.000884889	0.0114457	-1.88907
HSPA8P11	-1.65912	1.65912	down	-7.96131	-3.45694	0.000890784	0.0114991	-1.89532
SCG3	1.59582	1.59582	up	-1.10618	3.45672	0.000891407	0.0115046	-1.89598
LILRP2	1.57245	1.57245	up	-8.88343	3.45645	0.000892185	0.0115121	-1.8968
DLGAP1	1.94365	1.94365	up	-3.20875	3.45474	0.000897109	0.0115659	-1.90198
RP11-567P19.1	-2.42041	2.42041	down	-7.63003	-3.45473	0.000897142	0.0115659	-1.90201
RP11-455G16.1	-1.96142	1.96142	down	-7.42198	-3.4543	0.000898368	0.0115792	-1.9033
TSPAN8	-2.78194	2.78194	down	-4.26288	-3.45397	0.000899331	0.0115865	-1.90431
PAX6	1.59628	1.59628	up	-1.56092	3.45278	0.00090276	0.0116204	-1.90789
PTH2R	1.69201	1.69201	up	-8.14742	3.45155	0.000906318	0.0116483	-1.9116
TRBV6-5	3.15932	3.15932	up	-6.26835	3.45115	0.000907489	0.0116608	-1.91281
PCDHA5	-2.05098	2.05098	down	-7.49356	-3.45097	0.000908029	0.0116652	-1.91337
EIF4A2P1	1.98511	1.98511	up	-3.74321	3.44632	0.000921658	0.0118195	-1.9274
GABRB3	1.85549	1.85549	up	-0.40348	3.44494	0.000925735	0.0118563	-1.93155
THEGL	1.98484	1.98484	up	-4.87433	3.44264	0.000932578	0.0119335	-1.93848
RP11-205K6.1	-2.10765	2.10765	down	-7.98705	-3.44248	0.000933064	0.0119345	-1.93897
CTA-246H3.8	-2.44295	2.44295	down	-2.54079	-3.44218	0.000933957	0.0119381	-1.93987
RP11-539L10.2	1.6126	1.6126	up	-5.41526	3.44107	0.00093729	0.0119715	-1.94323
DYDC1	-1.95693	1.95693	down	-8.31597	-3.44082	0.000938015	0.0119742	-1.94395
SPP1	-2.34168	2.34168	down	5.59957	-3.43846	0.000945149	0.0120417	-1.95108
SV2C	1.9613	1.9613	up	-7.80467	3.43833	0.00094554	0.0120433	-1.95147
AF146191.4	-2.03528	2.03528	down	-4.72265	-3.43828	0.000945682	0.0120433	-1.95161
AL022393.9	-2.07791	2.07791	down	-5.35187	-3.43747	0.000948135	0.0120693	-1.95405
RP11-5P4.1	-2.77688	2.77688	down	-6.46398	-3.43712	0.000949184	0.01208	-1.95509
PP12613	1.53295	1.53295	up	-8.86309	3.437	0.000949563	0.0120822	-1.95547
RP11-94C24.13	-1.50794	1.50794	down	-6.94662	-3.43552	0.000954057	0.0121341	-1.95991
C6orf25	1.62414	1.62414	up	-6.60804	3.4347	0.000956574	0.0121614	-1.96239
SLC52A1	2.09952	2.09952	up	-5.64273	3.43382	0.000959272	0.0121898	-1.96504
TRBV7-9	3.42774	3.42774	up	-5.83273	3.43315	0.000961336	0.0122104	-1.96706
RP1-80N2.3	-1.5095	1.5095	down	-3.79076	-3.43309	0.000961516	0.0122104	-1.96724
AC006116.21	-2.20629	2.20629	down	-8.29141	-3.4328	0.000962386	0.012211	-1.96809
SSTR3	1.80473	1.80473	up	-8.47193	3.43112	0.000967575	0.0122581	-1.97315
AC015933.2	-2.09822	2.09822	down	-8.41117	-3.43047	0.000969596	0.0122727	-1.97511
PLA2R1	1.54774	1.54774	up	-2.20158	3.42997	0.000971151	0.0122875	-1.97662
LINC00977	2.01774	2.01774	up	-5.99323	3.429	0.000974149	0.0123174	-1.97952
P2RY10	2.53661	2.53661	up	-5.91795	3.428	0.000977286	0.0123471	-1.98254
IL17REL	1.71289	1.71289	up	-6.74145	3.42772	0.000978141	0.0123546	-1.98337
RP11-492E3.2	1.5524	1.5524	up	-8.767	3.42672	0.000981285	0.0123916	-1.98638
C9orf106	1.72436	1.72436	up	-8.06434	3.42561	0.000984748	0.0124246	-1.9897
CTC-548K16.1	2.34171	2.34171	up	-4.69839	3.42511	0.000986344	0.0124367	-1.99122
RP11-510M2.2	-2.24884	2.24884	down	-4.72763	-3.42078	0.00100005	0.012596	-2.0042
TGM5	1.64914	1.64914	up	-7.40418	3.41967	0.00100362	0.0126246	-2.00755
CTC-523E23.5	-1.71272	1.71272	down	-6.20148	-3.41802	0.00100888	0.0126709	-2.01247
RP4-646N3.1	-1.85199	1.85199	down	-7.89109	-3.41787	0.00100938	0.0126726	-2.01293
LINC00284	1.95904	1.95904	up	-8.08394	3.41758	0.0010103	0.0126788	-2.01379
RP11-212I21.2	2.84089	2.84089	up	-6.67837	3.41663	0.00101337	0.0126942	-2.01665
SLC6A11	-1.90352	1.90352	down	-3.08704	-3.41614	0.00101497	0.0127101	-2.01813
RP5-897D18.1	-1.8945	1.8945	down	-8.6609	-3.41516	0.00101814	0.0127308	-2.02106
GS1-204I12.4	-1.78893	1.78893	down	-8.50313	-3.41473	0.00101952	0.0127453	-2.02233
RP11-815N9.2	2.18282	2.18282	up	-5.24068	3.41239	0.00102714	0.0128296	-2.02933
CLIC3	1.60443	1.60443	up	-2.22777	3.41124	0.00103094	0.0128688	-2.0328
BEND4	1.60203	1.60203	up	-8.69585	3.41109	0.00103141	0.0128702	-2.03323
CATSPERD	-1.97238	1.97238	down	-1.88892	-3.40868	0.00103935	0.0129608	-2.04044
HLA-DOB	1.99993	1.99993	up	-3.25356	3.40823	0.00104084	0.0129744	-2.04179
RBAKDN	1.81324	1.81324	up	-0.821854	3.40817	0.00104106	0.0129744	-2.04199
AC007389.3	1.91002	1.91002	up	-7.33549	3.40569	0.00104929	0.0130603	-2.04939
HCG4P11	2.82165	2.82165	up	-4.91413	3.40329	0.00105733	0.0131366	-2.05656
SOX5	-1.5693	1.5693	down	-1.68857	-3.402	0.00106168	0.0131796	-2.06042
CACNG8	-1.71145	1.71145	down	-5.4664	-3.40194	0.00106186	0.0131796	-2.06058
OR7E22P	-2.0222	2.0222	down	-7.39509	-3.40021	0.00106774	0.0132463	-2.06577
RP11-616M22.12	2.82539	2.82539	up	-5.17441	3.39845	0.00107373	0.0133094	-2.07103
AP001058.3	1.72798	1.72798	up	-8.96448	3.39531	0.00108447	0.0134113	-2.08038
MPPED1	1.73287	1.73287	up	-7.22365	3.39401	0.00108897	0.0134556	-2.08427
RP11-981G7.1	-1.62225	1.62225	down	-7.32527	-3.3927	0.0010935	0.0135002	-2.08817
BTBD11	1.54898	1.54898	up	-3.07781	3.39128	0.00109842	0.0135524	-2.09239
AC013463.2	-2.63142	2.63142	down	-6.28083	-3.38909	0.0011061	0.0136356	-2.09894
AC005609.18	-2.26331	2.26331	down	-8.03749	-3.38851	0.00110813	0.0136519	-2.10066
CCR7	1.83749	1.83749	up	-3.75902	3.38735	0.00111222	0.0136938	-2.10412
MCF2	-1.66627	1.66627	down	0.00677468	-3.3864	0.00111557	0.0137235	-2.10695
RUNDC3A-AS1	1.82474	1.82474	up	-6.96043	3.38565	0.00111824	0.0137505	-2.10919
NOXO1	-1.76701	1.76701	down	-4.59227	-3.38528	0.00111954	0.0137636	-2.11028
TRDC	2.16149	2.16149	up	-3.27918	3.38348	0.00112592	0.0138247	-2.11562
RP11-298D21.3	-2.71309	2.71309	down	-5.70159	-3.38197	0.00113132	0.0138736	-2.12011
BCAP31P2	2.30966	2.30966	up	-8.15939	3.38114	0.00113432	0.0139074	-2.1226
IL1RL2	1.99738	1.99738	up	-6.70103	3.38067	0.001136	0.0139173	-2.12399
C6orf99	2.22413	2.22413	up	-3.45333	3.38058	0.00113631	0.0139173	-2.12425
TNFRSF11B	1.94834	1.94834	up	-3.70779	3.37973	0.0011394	0.0139434	-2.12679
IL7R	1.95208	1.95208	up	-4.56403	3.37896	0.00114217	0.01397	-2.12907
LINC01608	-2.63401	2.63401	down	-6.59127	-3.37867	0.00114322	0.0139727	-2.12994
AC007879.4	-2.16407	2.16407	down	-7.75945	-3.37828	0.00114465	0.0139813	-2.13111
RP11-454K7.1	-1.77532	1.77532	down	-8.72716	-3.37795	0.00114583	0.0139903	-2.13207
LINC01486	-2.24012	2.24012	down	-6.66001	-3.37552	0.00115466	0.0140684	-2.13928
IL1B	1.66139	1.66139	up	-3.75477	3.37363	0.00116159	0.014144	-2.1449
AC074366.3	1.64726	1.64726	up	-8.86229	3.37297	0.00116401	0.0141706	-2.14686
CMB9-94B1.2	-1.67113	1.67113	down	-0.537952	-3.37273	0.00116489	0.0141754	-2.14756
NR1H4	-1.86162	1.86162	down	-7.45705	-3.37171	0.00116866	0.0142184	-2.1506
GPR174	2.47328	2.47328	up	-6.72473	3.37143	0.00116969	0.014225	-2.15143
SAMD3	2.45789	2.45789	up	-4.79548	3.37078	0.00117212	0.0142484	-2.15338
RP11-159H10.3	2.15685	2.15685	up	-2.59127	3.37072	0.00117235	0.0142484	-2.15356
PPIAP19	2.38187	2.38187	up	-6.71557	3.36998	0.00117508	0.0142698	-2.15574
MT1A	1.51853	1.51853	up	1.08645	3.36961	0.00117646	0.0142836	-2.15685
TTC24	2.27245	2.27245	up	-7.16281	3.36863	0.0011801	0.01431	-2.15975
EEF1A1P29	-1.62375	1.62375	down	-4.59005	-3.3678	0.00118321	0.0143412	-2.16222
AC007879.5	2.30392	2.30392	up	-7.35081	3.36764	0.00118379	0.0143429	-2.16268
AC243945.1	2.53183	2.53183	up	-7.71774	3.36744	0.00118453	0.0143448	-2.16327
KLK14	-2.07943	2.07943	down	-5.13174	-3.36605	0.00118975	0.0143929	-2.16739
TRAV12-1	2.73039	2.73039	up	-7.42721	3.36601	0.00118989	0.0143929	-2.1675
ZBTB20-AS1	1.58925	1.58925	up	-9.03296	3.36581	0.00119066	0.0143992	-2.1681
SPIB	1.93838	1.93838	up	-3.19385	3.36363	0.00119889	0.0144838	-2.17457
RP11-541G9.2	-1.63585	1.63585	down	-8.86505	-3.36246	0.00120331	0.0145253	-2.17803
CTD-2240J17.2	-2.31821	2.31821	down	-7.5413	-3.36212	0.0012046	0.0145318	-2.17903
TRAV12-3	2.8439	2.8439	up	-7.08868	3.36103	0.00120877	0.0145732	-2.18228
AGGF1P1	-2.1403	2.1403	down	-5.5386	-3.36017	0.00121202	0.0146034	-2.1848
CDC37P1	-2.56614	2.56614	down	-6.24059	-3.35978	0.00121351	0.0146153	-2.18595
RP11-150O12.6	1.81549	1.81549	up	-2.69905	3.35898	0.00121661	0.0146455	-2.18834
RP11-435O5.2	-1.79787	1.79787	down	-3.67011	-3.35562	0.00122956	0.0147729	-2.19828
CTD-2540B15.9	-2.49648	2.49648	down	-7.03132	-3.35559	0.00122966	0.0147729	-2.19835
RP11-410D17.2	-2.14965	2.14965	down	-7.50454	-3.35485	0.00123254	0.0147958	-2.20055
INA	1.81738	1.81738	up	-4.08241	3.35426	0.00123482	0.0148201	-2.20228
[truncated: 561 more rows]
